# Supplementary material for: Application of machine-learning-based global optimization: potential-dependent co-electrosorbed structure and activity on the Pd(110) surface
Source: Royal Society of Chemistry journal article supplement (doi:10.1039/d2cp01610a), 2022-01-01
Supplement: d2cp01610a1.pdf [file d2cp01610a1.pdf]

# Application of Machine-learning-based global optimization: Potential-dependent Co-electrosorbed Structure and Activity on Pd(110) Surface

Li-yuan Wang and Ya-Hui Fang\*

<sup>a</sup>School of Chemical and Environmental Engineering, Shanghai Institute of Technology,  
Shanghai 201418, China;

\*E-mail: huihuifang@sit.edu.cn

## Table of Contents

- 1. Theoretical Methods and Calculation detail**
- 2. The surface structures of  $H_{r_i}/\text{Pd}(110)$  and  $H_{r_i}-\text{NH}_y/\text{Pd}(110)$  phases**
- 3. XYZ coordinates for the configurations in Fig. 1**
- 4. XYZ coordinates for the configurations in Fig. 2**

# 1. Theoretical Methods and Calculation detail

## 1.1 Architecture of neural network potential

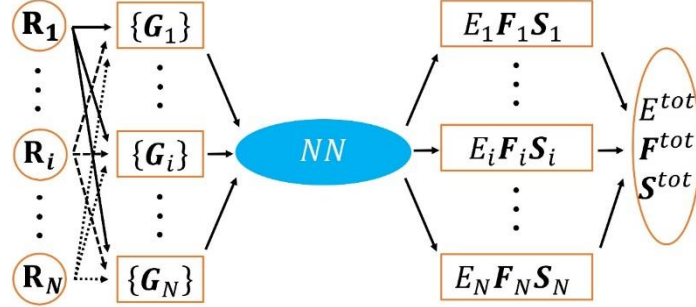

**Scheme S1.** Scheme of the HDNN architecture. The subscripts ( $1, i, \dots, N$ ) are atom indices and represent the total atoms in a structure. The inputs of NN are a set of structural descriptors  $\{G\}$ , which are constructed from the Cartesian coordinates  $\{R\}$  of the structure, while the outputs of NN are the atomic properties  $\{E_i, F_i, S_i\}$ , i.e., energies, forces, and stresses. The overall properties,  $E^{tot}$ ,  $F^{tot}$ , and  $S^{tot}$ , can be calculated from the individual atomic contributions.

In this work, we utilized the high dimensional neural network (HDNN) scheme to construct the global NN (G-NN) potential, as shown in Scheme S1. The input nodes to NN are a set of structural descriptors of a structure, as detailedly discussed in our previous works.<sup>1-3</sup> The total energy  $E^{tot}$  of the structure can be composed as a linear combination of its atomic energy  $E^i$  from the output of NN

$$E^{tot} = \sum_i E_i \quad (1)$$

Consistently, the atomic force can be analytically derived from the total energy, i.e., the force component  $F_{k,\alpha}$  ( $\alpha = x, y, \text{ or } z$ ) acting on atom  $k$  is the derivative of the total energy  $E^{tot}$  with respect to coordinate  $R_{k,\alpha}$ . In combination with Eq. 1, the force component  $F_{k,\alpha}$  then is related to the derivatives of the atomic energy  $E^i$  with respect to the  $j^{\text{th}}$  structural descriptors of atom  $i$ ,  $G_{j,i}$

$$F_{k,\alpha} = -\frac{\partial E^{tot}}{\partial R_{k,\alpha}} = -\sum_{i,j} \frac{\partial E_i}{\partial G_{j,i}} \frac{\partial G_{j,i}}{\partial R_{k,\alpha}} \quad (2)$$

Similarly, the element  $\sigma_{\alpha\beta}$  of static stress tensor matrix can be analytically derived as

$$\sigma_{\alpha\beta} = -\frac{1}{V} \sum_{i,j,d} \frac{(r_d)_\alpha (r_d)_\beta}{r_d} \frac{\partial E_i}{\partial G_{j,i}} \frac{\partial G_{j,i}}{\partial r_d} \quad (3)$$

where  $r_d$  and  $r_d$  are the distance vector, constituted by  $G_{j,i}$  and its module, respectively, and  $V$  is the volume of the structure.

## 1.2 Generation of global dataset using SSW-NN

The quality of the potential energy surface (PES) of G-NN is largely determined by its training dataset. Here we utilized the stochastic surface walking (SSW) global optimization<sup>4-6</sup> to generate a global dataset, which is fully automated and does not need a priori knowledge on the system, such as the structural motif, e.g. bonding patterns and symmetry. In brief, the SSW-NN method involves three stages to generate the global dataset, as described below.

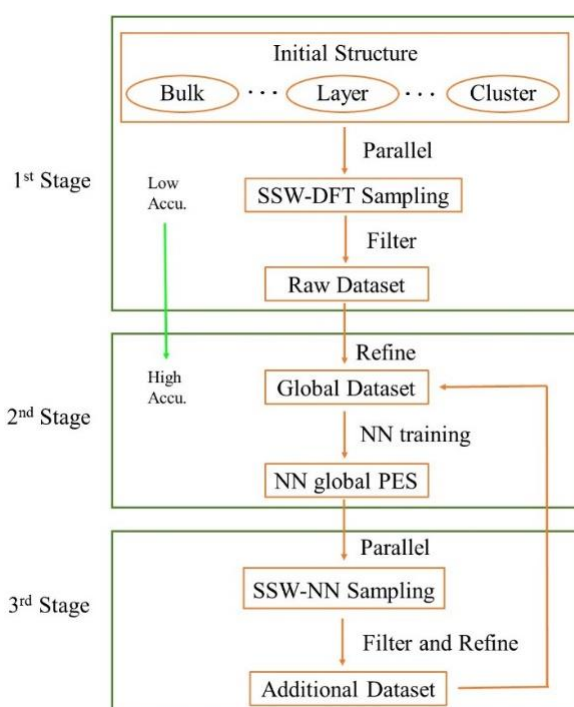

**Scheme S2.** Procedure for the generation of the global training dataset by SSW global optimization. In the first stage, the SSW sampling is typically performed by low accuracy DFT calculations. In the second stage, the global dataset is first refined with high accuracy DFT setups, and then a NN training is performed based on the accurate global dataset. In the third stage, an additional dataset is generated by SSW sampling utilizing the previously obtained NN PES, and is fed into the global dataset. A new cycle of NN training then starts based on the new global dataset (back to stage 2).

In brief, the SSW-NN method involves three stages to generate the global dataset (see Scheme S2), as described below.

**(i) The first stage** generates a raw dataset, which contains the most common atomic environment and serves to build an initial NN PES. This is done by performing density functional theory (DFT) SSW global optimization in a massively parallel way. In this stage, the DFT calculations have low accuracy setups and small unit cells to speed up the SSW search. By collecting and screening the structures from SSW trajectories, a raw dataset is obtained.

(ii) **The second stage** trains a NN global PES. This is done by refining the dataset using DFT calculations with high accuracy setups, followed by NN training on the accurate global dataset (see our previous work<sup>7</sup> for details). The NN architecture applied in this stage utilizes a small set of structural descriptors and a small network size.

(iii) **The third stage** iteratively expands the global dataset. It targets to increase the predictive power of NN PES by incorporating more structural patterns into the dataset. This is done by performing SSW PES search using the NN PES obtained in the second stage, starting from a variety of initial structures. These initial structures are randomly constructed, and also include large systems with many atoms per unit cell. The structures from all the SSW trajectories are collected and filtered to generate an additional dataset. The new dataset is then fed to the global dataset to start a new cycle of NN training (back to stage 2). For example, our final dataset for training the G-NN of Pd-H system contains 18738 structures. To pursue a high accuracy for PES, we have adopted a large set of power-type structure descriptors (PTSDs), which contains 166 descriptors for every element with only power-type structure descriptors, including 95 two-body, 63 three-body, 8 four-body descriptors, and compatibly, the network utilized is also large involving three-hidden layers. Min-max scaling is utilized to normalization the training data sets. Hyperbolic tangent activation functions were used for the hidden layers, while a linear transformation was applied to the output layer of all networks. The limited-memory Broyden-Fletcher-Goldfarb-Shanno (L-BFGS) method is used to minimize the loss function to match DFT energy, force and stress. The final energy and force criterions of the root mean square errors are around 2.808 meV/atom and 0.060 eV/Å respectively.

### 1.3 Benchmark of G-NN potential against DFT calculations

To examine the accuracy of the G-NN potential, we have calculated the total energy difference between G-NN and DFT for the representative surface structures of  $H_n$ Pd, which shows the mean error between DFT energy and NN energy is 3.52 meV/atom. It is quite standard for NN potentials and accurate enough for searching the stable structure candidates. The details for the comparison between DFT and NN results can be found in **Table S1**.

**Table S1.** Benchmark of NN calculations for  $H_{r_i}$ Pd systems as compared with DFT results. Listed data include the compositions, total atom number ( $N_{\text{atom}}$ ), DFT energy, NN energy and energy differences between DFT energy and NN energy ( $E_{\text{diff}}$ , meV/atom).

| composition | $N_{\text{atom}}$ | DFT-en (eV) | NN-en (eV) | $E_{\text{diff}}$ (meV/atom) |
|-------------|-------------------|-------------|------------|------------------------------|
| H15Pd66     | 81                | -386.0789   | -386.4090  | 4.08                         |
| H16Pd66     | 82                | -389.9915   | -390.3317  | 4.15                         |
| H18Pd66     | 84                | -397.8536   | -398.1436  | 3.45                         |
| H19Pd66     | 85                | -401.6662   | -401.9627  | 3.49                         |

|         |    |           |           |      |
|---------|----|-----------|-----------|------|
| H20Pd66 | 86 | -405.4500 | -405.7728 | 3.75 |
| H21Pd66 | 87 | -409.1982 | -409.5663 | 4.23 |
| H22Pd66 | 88 | -412.8209 | -413.0377 | 2.46 |
| H23Pd66 | 89 | -416.3344 | -416.6107 | 3.10 |
| H24Pd66 | 90 | -419.9015 | -420.1659 | 2.94 |

\*Mean error between DFT energy and NN energy is 3.52 meV/atom.

#### 1.4 Stochastic surface walking (SSW) global Structure Search

The potential energy surface (PES) of electroadsorbed  $H_{r_i}-NH_y/Pd(110)$  phase was explored using SSW-NN global structure search. The SSW method is capable of surmounting the high barrier on PES and identifying low energy minima. The efficiency of the method for exploring PES has been demonstrated for both aperiodic (molecules,<sup>8</sup> clusters<sup>9-11</sup>) and periodic (surfaces,<sup>12</sup> crystals<sup>8,13</sup>) systems. The algorithm of the SSW global optimization method can be found in our previous.<sup>14-16</sup> The key SSW parameters utilized are the same with those utilized previously for exploring PES of carbon and boron,<sup>11,15</sup> i.e. the Gaussian width being 0.6 Å, the number of Gaussian bias potential being 10.

The  $H_{r_i}-NH_y/Pd(110)$  structure at different compositions has been investigated in the Pd(110) supercell periodic calculations by recently developed SSW-NN method. It is reasonable to focus on the adsorbed structures at top two layers of Pd(110) with different  $H_{r_i}/Pd$  ratios, where the bottom surface is blocked by the fully covered hydrogen. The NN simulation is at least 3~4 orders of magnitude faster than DFT, while keeping the accuracy in energy and force comparable with those from DFT. The combination of SSW with NN potential thus allows to fast obtain the global PES of more complex materials.<sup>15,16</sup> The SSW-NN method to explore PES can be divided into three steps: (i) global dataset generation based on DFT calculations using selected structures from SSW simulation, (ii) G-NN potential fitting and (iii) SSW global optimization using G-NN potential. These steps are iteratively performed until the NN potential is transferable and robust enough to describe the global PES and more details can be found in our previous work.<sup>17</sup> The global minima at the key composition of  $H_{\theta_i}Pt$  as identified from the SSW-NN simulation, where each composition is simulated in the unit cells of ~200 atoms and explored to cover more than  $10^7$  structures on PES by SSW. Thus, a large variety of structures have been obtained from SSW-NN simulation. All the low energy structure candidates from SSW-NN exploration are finally verified by DFT calculations with high accuracy setups.

#### 1.5 DFT calculation on $H_{r_i}-NH_y/Pd(110)$ system

All DFT calculations were performed using the SIESTA package with numerical atomic orbital basis sets<sup>18,19</sup> and Troullier-Martins normconserving pseudopotentials.<sup>20</sup> The exchange-correlation functional utilized was at the generalized gradient approximation level, known as GGA-PBE.<sup>21</sup> The

optimized double- $\zeta$  plus (DZP) polarization basis set was employed. For the Pd(110) surfaces, we utilized  $p(3\times 2)$  (12 atoms per layer) six-layer slabs with top two layers being relaxed at the bulk-truncated position, where the bottom surface have been occupied by adsorbed hydrogen fully and fixed. The solid-liquid interface was described using the periodic continuum solvation model based on the modified Poisson-Boltzmann equation (CM-MPB), which can take into account the solvation and potential effect.<sup>22-24</sup> The charged-slab DFT/CM-MPB method developed previously<sup>22, 24, 25</sup> are utilized to add explicit charge onto the surface and the neutralizing countercharge are added into solvation following the MPB equation. The addition of surface excess charge will shift the electrochemical potential of system (the potential difference between Fermi level and the potential in solution) and thus can be determined explicitly via DFT/CM-MPB method. It should be mentioned that DFT calculations have been utilized to validate the low energy structures and confirm the identified global minimum. All energetics reported in this work are from DFT without specifically mentioning. The accuracy of the calculated energetics was examined by benchmarking the results from SIESTA with those from the plane-wave methodology and the difference in adsorption energy is generally below 0.06 eV for H (e.g, the H free energy of adsorption (with respect to the free energy of the gas-phase H<sub>2</sub> at the standard state) at H<sub>0.5</sub>Pd is calculated to be -0.24 eV from SIESTA, and it is -0.29 eV from the plane-wave method).

## References:

- 1 S.-D. Huang, C. Shang, X.-J. Zhang and Z.-P. Liu, *Chemical Science*, 2017, **8**, 6327-6337.
- 2 S.-D. Huang, C. Shang, P.-L. Kang and Z.-P. Liu, *Chemical Science*, 2018, **9**, 8644-8655.
- 3 C. Shang, S.-D. Huang and Z.-P. Liu, *Journal of Computational Chemistry*, 2019, **40**, 1091-1096.
- 4 C. Shang and Z.-P. Liu, *Journal of Chemical Theory and Computation*, 2013, **9**, 1838-1845.
- 5 X.-J. Zhang, C. Shang and Z.-P. Liu, *Journal of Chemical Theory and Computation*, 2013, **9**, 3252-3260.
- 6 C. Shang, X.-J. Zhang and Z.-P. Liu, *Physical Chemistry Chemical Physics*, 2014, **16**, 17845-17856.
- 7 S. Ma, C. Shang and Z.-P. Liu, *The Journal of Chemical Physics*, 2019, **151**, 050901.
- 8 S. H. Guan, X. J. Zhang and Z. P. Liu, *J. Am. Chem. Soc.*, 2015, **137**, 8010-8013.
- 9 G. F. Wei and Z. P. Liu, *Chem. Sci.*, 2015, **6**, 1485-1490.
- 10 G. F. Wei, C. Shang and Z. P. Liu, *Phys. Chem. Chem. Phys.*, 2015, **17**, 2078-2087.

- 11 H. J. Zhai, Y. F. Zhao, W. L. Li, Q. Chen, H. Bai, H. S. Hu, Z. A. Piazza, W. J. Tian, H. G. Lu, Y. B. Wu, Y. W. Mu, G. F. Wei, Z. P. Liu, J. Li, S. D. Li and L. S. Wang, *Nat. Chem.*, 2014, **6**, 727-731.
- 12 S. C. Zhu, S. H. Xie and Z. P. Liu, *J. Am. Chem. Soc.*, 2015, **137**, 11532-11539.
- 13 Y. F. Li, S. C. Zhu and Z.-P. Liu, *J. Am. Chem. Soc.*, 2016, **138**, 5371-5379.
- 14 C. Shang, X. J. Zhang and Z. P. Liu, *Phys. Chem. Chem. Phys.*, 2014, **16**, 17845-17856.
- 15 X. J. Zhang, C. Shang and Z. P. Liu, *J. Chem. Theory Comput.*, 2013, **9**, 3252-3260.
- 16 X. J. Zhang, C. Shang and Z. P. Liu, *J. Chem. Theory Comput.*, 2013, **9**, 5745-5753.
- 17 S.-D. Huang, C. Shang, X.-J. Zhang and Z.-P. Liu, *Chem. Sci.*, 2017, **8**, 6327-6337.
- 18 J. M. Soler, E. Artacho, J. D. Gale, A. Garcia, J. Junquera, P. Ordejon and D. Sanchez-Portal, *Journal of Physics-Condensed Matter*, 2002, **14**, 2745-2779.
- 19 J. Junquera, O. Paz, D. Sanchez-Portal and E. Artacho, *Physical Review B*, 2001, **64**, 235111
- 20 N. Troullier and J. L. Martins, *Physical Review B*, 1991, **43**, 1993-2006.
- 21 J. P. Perdew, K. Burke and M. Ernzerhof, *Physical Review Letters*, 1996, **77**, 3865-3868.
- 22 Y. H. Fang and Z. P. Liu, *J. Am. Chem. Soc.*, 2010, **132**, 18214-18222.
- 23 Y.-H. Fang, G.-F. Wei and Z.-P. Liu, *J. Phys. Chem. C*, 2013, **117**, 7669-7680.
- 24 C. Shang and Z. P. Liu, *J. Am. Chem. Soc.*, 2011, **133**, 9938-9947.
- 25 Y. F. Li, Z. P. Liu, L. L. Liu and W. G. Gao, *J. Am. Chem. Soc.*, 2010, **132**, 13008-13015.

## 2. The optimized structures of $H_{r_i}/\text{Pd}(110)$ and $H_{r_i}\text{-NH}_y/\text{Pd}(110)$

phases

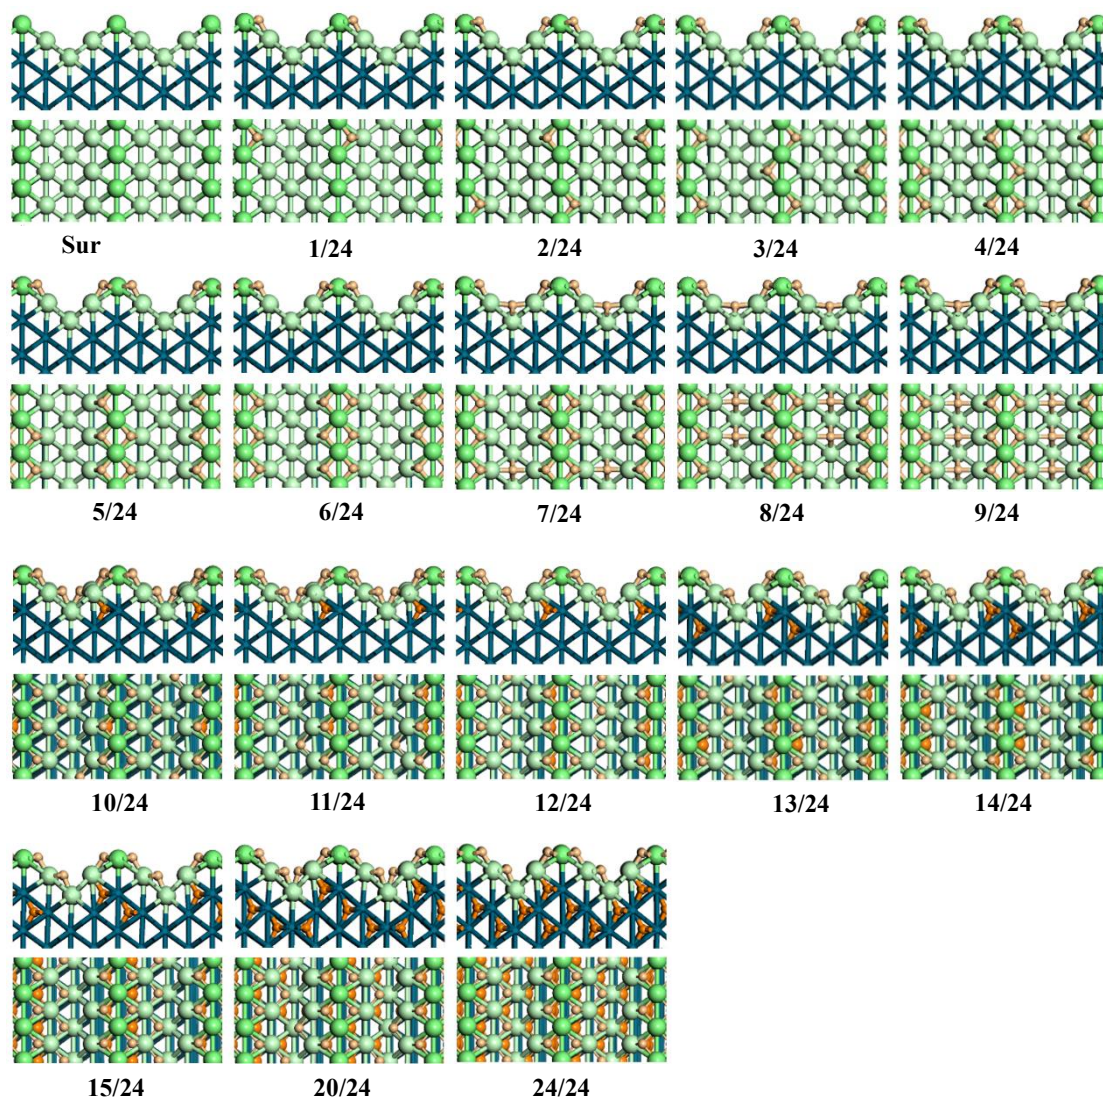

Figure S1. The optimized stable structures of different  $H_{r_i}/\text{Pd}(110)$  ratios. Large green ball: surface ridge Pd atoms, Large pale green ball: surface terrace Pd atoms, Small pale orange ball: surface H atoms, Small orange ball: subsurface H atoms.



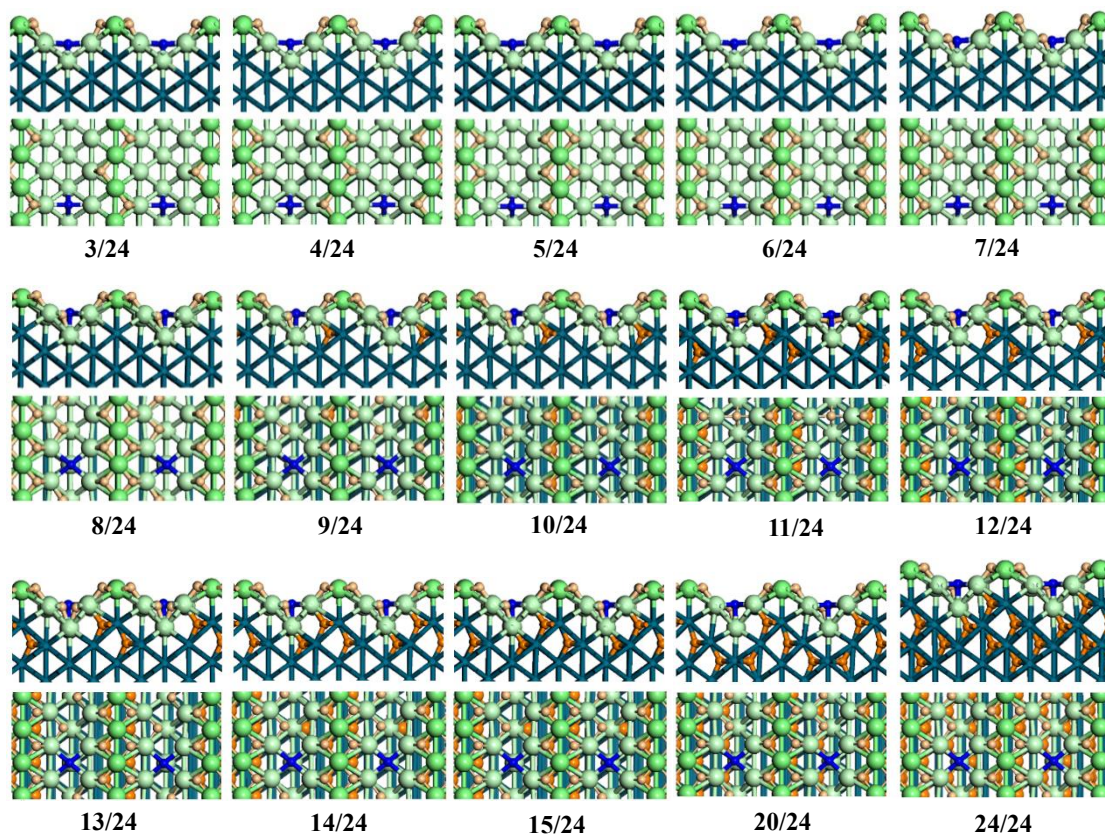

Figure S2. The optimized stable structure of the co-electrosorbed  $H_{r_i}$ - $N/Pd(110)$  surface phases at different  $H_{r_i}/Pd(110)$  ratios. Large green ball: surface bridge Pd atoms, Large pale green ball: surface terrace Pd atoms, Blue ball: N atoms, Small pale orange ball: surface H atoms, Small orange ball: subsurface H atoms.

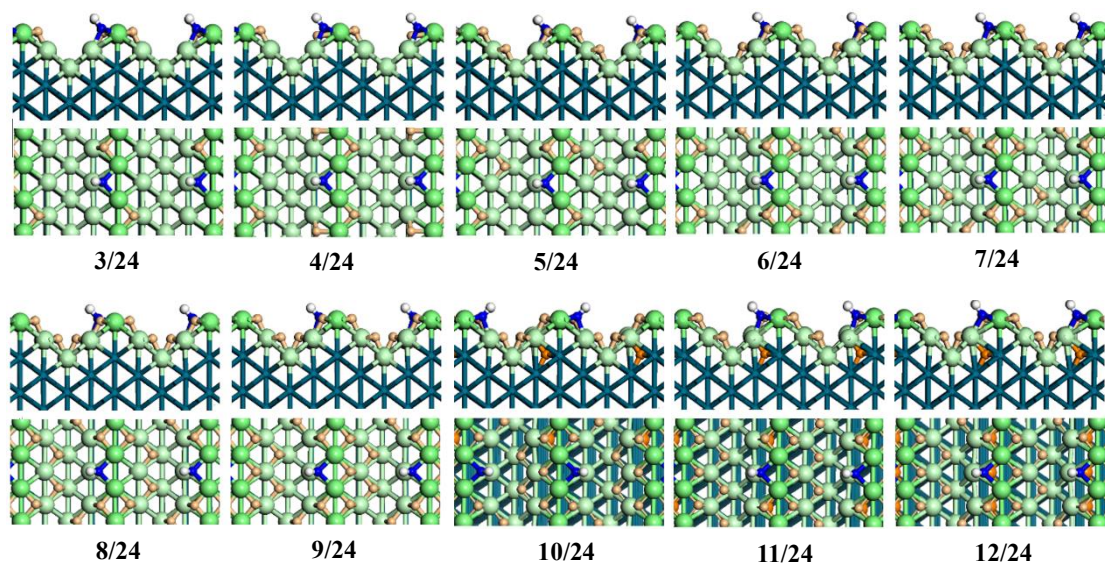

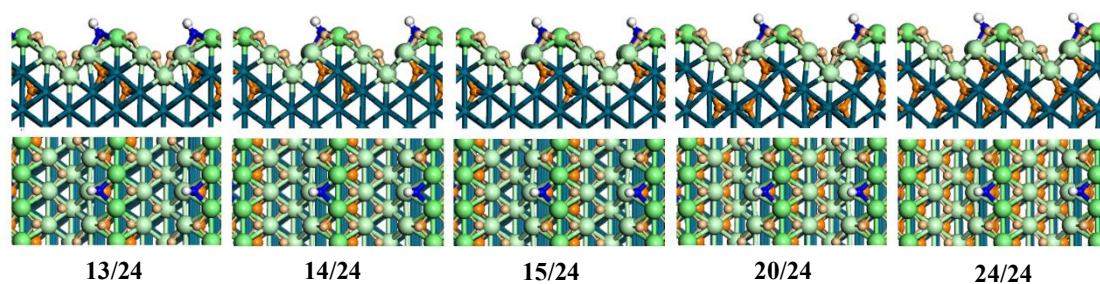

Figure S3. The optimized stable structure of the co-electrosorbed  $H_{r_i}$ -NH/Pd(110) surface phases at different  $H_{r_i}/Pd(110)$  ratios. Large green ball: surface bridge Pd atoms, Large pale green ball: surface terrace Pd atoms, Blue ball: N atoms, Small pale orange ball: surface H atoms, Small orange ball: subsurface H atoms.

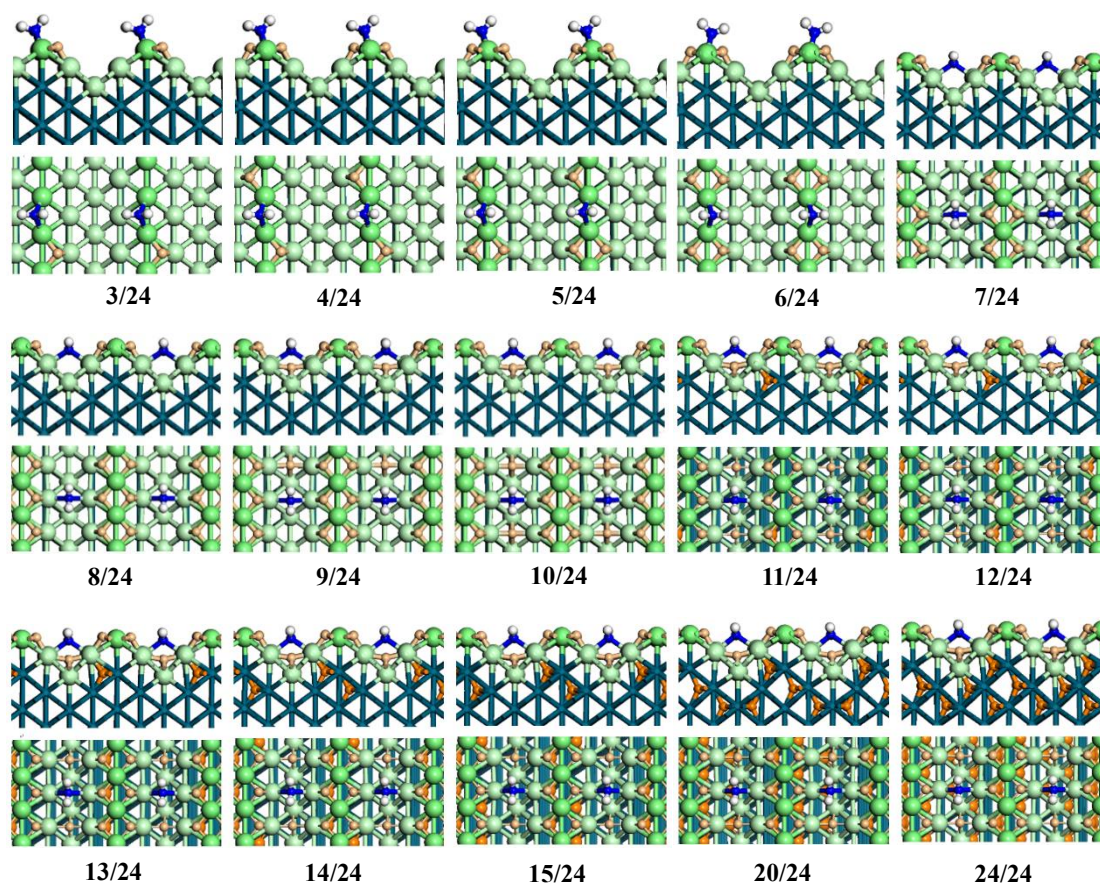

Figure S4. The optimized stable structure of the co-electrosorbed  $H_{r_i}$ -NH<sub>2</sub>/Pd(110) surface phases at different  $H_{r_i}/Pd(110)$  ratios. Large green ball: surface bridge Pd atoms, Large pale green ball: surface terrace Pd atoms, Blue ball: N atoms, Small pale orange ball: surface H atoms, Small orange ball: subsurface H atoms.

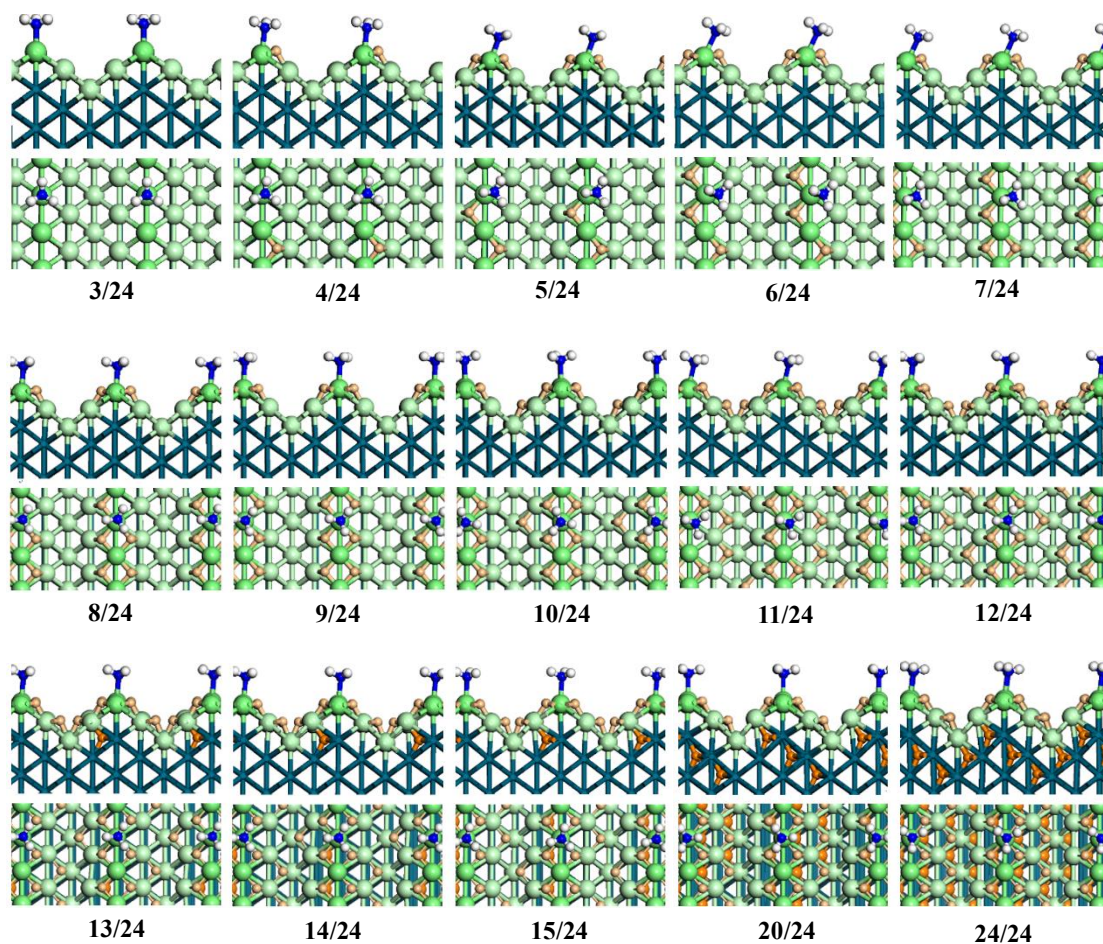

Figure S5. The optimized stable structure of the co-electrosorbed  $H_{r_i}\text{-NH}_3/\text{Pd}(110)$  surface phases at different  $H_{r_i}/\text{Pd}(110)$  ratios. Large green ball: surface bridge Pd atoms, Large pale green ball: surface terrace Pd atoms, Blue ball: N atoms, Small pale orange ball: surface H atoms, Small orange ball: subsurface H atoms.

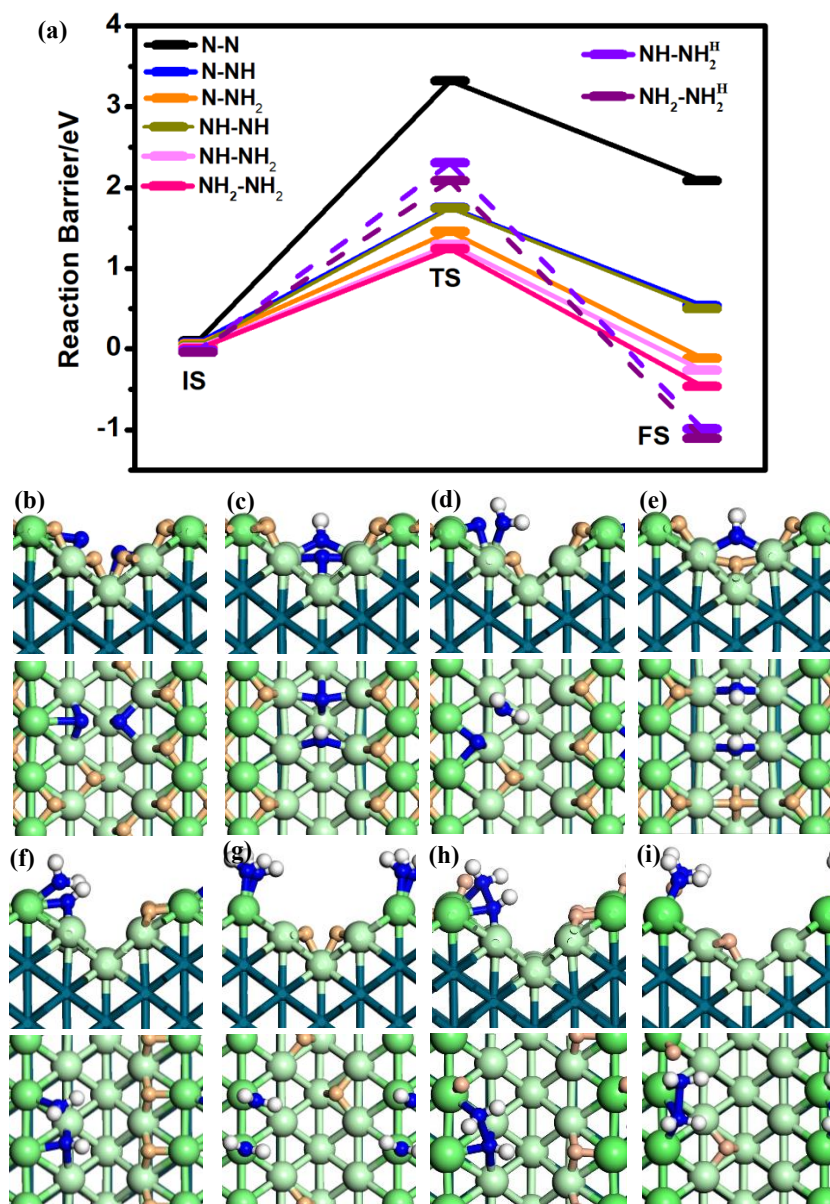

**Figure S6.** (a) The reaction barriers of  $\text{H}_y\text{N-NH}_y$  (N-N, N-NH, N-NH<sub>2</sub>, NH-NH, NH-NH<sub>2</sub> and NH<sub>2</sub>-NH<sub>2</sub>) directly dissociation and H-associative  $\text{H}_y\text{N-NH}_y$  dissociation (NH-NH<sub>2</sub><sup>H</sup> (NH-NH<sub>2</sub>+H→NH<sub>3</sub>+NH) and NH<sub>2</sub>-NH<sub>2</sub><sup>H</sup> (NH<sub>2</sub>-NH<sub>2</sub>+H→NH<sub>3</sub>+NH<sub>2</sub>)) at 0.25 V. The optimized structures of transition states for (b) N-N, (c) N-NH, (d) N-NH<sub>2</sub>, (e) NH-NH, (f) NH-NH<sub>2</sub>, (g) NH<sub>2</sub>-NH<sub>2</sub>, (h) NH-NH<sub>2</sub><sup>H</sup> and (i) NH<sub>2</sub>-NH<sub>2</sub><sup>H</sup>. Large green ball: surface bridge Pd atoms, Large pale green ball: surface terrace Pd atoms, Blue ball: N atoms, Small pale orange ball: surface H atoms

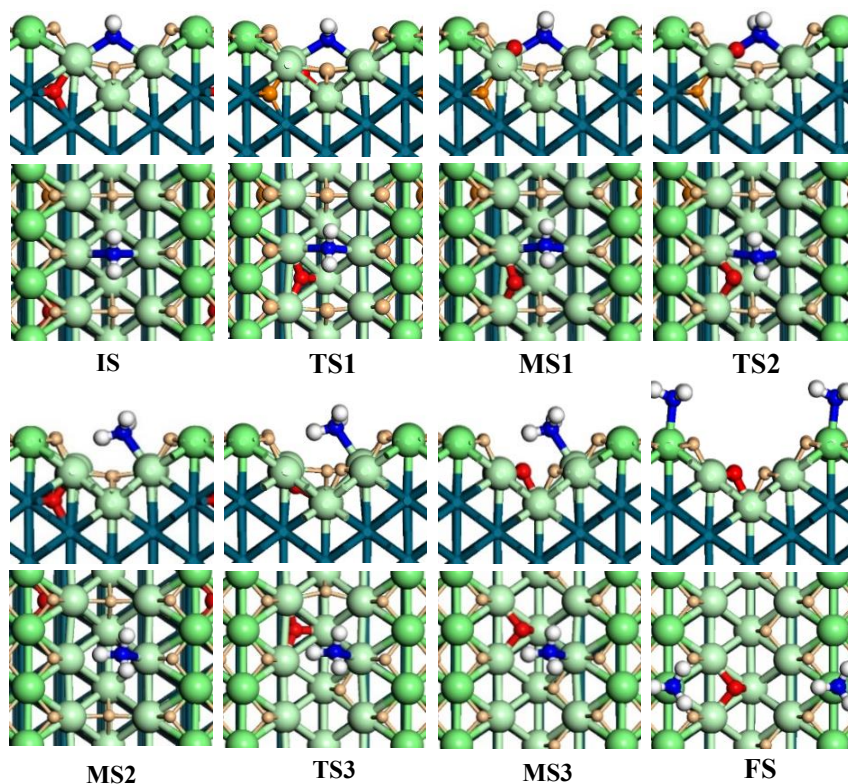

**Figure S7.** The optimized structures of intermediate states for  $\text{NH}_2$  and H coupling at 0.5 ratio hydrogen. Large green ball: surface bridge Pd atoms, Large pale green ball: surface terrace Pd atoms, Blue ball: N atoms, Small red ball: reactive H atom, Small pale orange ball: surface H atoms, Small orange ball: subsurface H atoms.

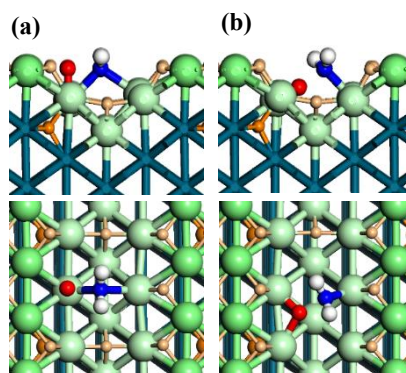

**Figure S8.** The optimized transition state (TS) structures of  $\text{NH}_2$  coupling with (a) surface fcc and (b) valley bridge H atoms at 0.5 ratio. Large green ball: surface bridge Pd atoms, Large pale green ball: surface terrace Pd atoms, Blue ball: N atoms, Small red ball: reactive H atom, Small pale orange ball: surface H atoms, Small orange ball: subsurface H atoms.

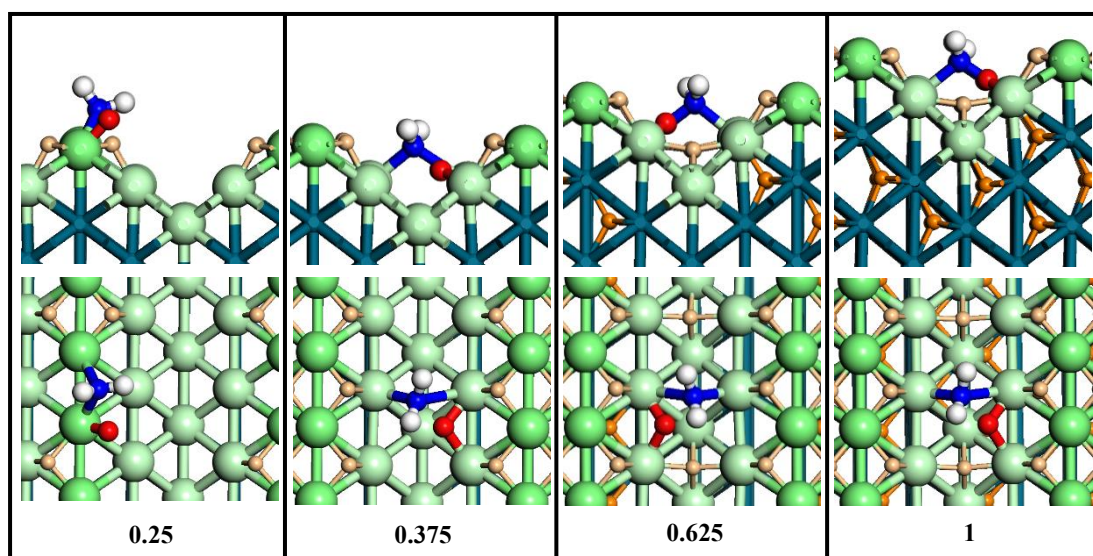

**Figure S9.** The optimized TS structures for  $\text{NH}_2$  and H coupling at 0.25, 0.375, 0.625 and 1 hydrogen ratio. Large green ball: surface bridge Pd atoms, Large pale green ball: surface terrace Pd atoms, Blue ball: N atoms, Small red ball: reaction H atom, Small pale orange ball: surface H atoms, Small orange ball: subsurface H atoms.

### 3. XYZ coordinates for the structures in Fig. 1

$H_{r_i}/\text{Pd}(110)$  ( $r_i = 0$ )

| PBC  | 7.8743      | 8.3520      | 45.3120      | 90.0000 | 90.0000 | 90.0000 (P1) |    |       |
|------|-------------|-------------|--------------|---------|---------|--------------|----|-------|
| Pd1  | 5.905756000 | 1.392028000 | 23.351992000 | XXXX    | 1       | xx           | Pd | 0.000 |
| Pd2  | 5.905756000 | 4.176000000 | 23.351992000 | XXXX    | 1       | xx           | Pd | 0.000 |
| Pd3  | 5.905756000 | 6.959972000 | 23.351992000 | XXXX    | 1       | xx           | Pd | 0.000 |
| Pd4  | 1.968585000 | 1.392028000 | 23.351992000 | XXXX    | 1       | xx           | Pd | 0.000 |
| Pd5  | 1.968585000 | 4.176000000 | 23.351992000 | XXXX    | 1       | xx           | Pd | 0.000 |
| Pd6  | 1.968585000 | 6.959972000 | 23.351992000 | XXXX    | 1       | xx           | Pd | 0.000 |
| Pd7  | 0.000000000 | 2.783972000 | 24.743977000 | XXXX    | 1       | xx           | Pd | 0.000 |
| Pd8  | 0.000000000 | 5.568028000 | 24.743977000 | XXXX    | 1       | xx           | Pd | 0.000 |
| Pd9  | 0.000000000 | 0.000000000 | 24.743977000 | XXXX    | 1       | xx           | Pd | 0.000 |
| Pd10 | 0.000000000 | 0.000000000 | 21.960008000 | XXXX    | 1       | xx           | Pd | 0.000 |
| Pd11 | 0.000000000 | 2.783972000 | 21.960008000 | XXXX    | 1       | xx           | Pd | 0.000 |
| Pd12 | 0.000000000 | 5.568028000 | 21.960008000 | XXXX    | 1       | xx           | Pd | 0.000 |
| Pd13 | 1.968585000 | 1.392028000 | 20.568023000 | XXXX    | 1       | xx           | Pd | 0.000 |
| Pd14 | 1.968585000 | 4.176000000 | 20.568023000 | XXXX    | 1       | xx           | Pd | 0.000 |
| Pd15 | 1.968585000 | 6.959972000 | 20.568023000 | XXXX    | 1       | xx           | Pd | 0.000 |
| Pd16 | 3.937171000 | 0.000000000 | 21.960008000 | XXXX    | 1       | xx           | Pd | 0.000 |
| Pd17 | 3.937171000 | 2.783972000 | 21.960008000 | XXXX    | 1       | xx           | Pd | 0.000 |
| Pd18 | 3.937171000 | 5.568028000 | 21.960008000 | XXXX    | 1       | xx           | Pd | 0.000 |
| Pd19 | 5.905756000 | 1.392028000 | 20.568023000 | XXXX    | 1       | xx           | Pd | 0.000 |
| Pd20 | 5.905756000 | 4.176000000 | 20.568023000 | XXXX    | 1       | xx           | Pd | 0.000 |
| Pd21 | 5.905756000 | 6.959972000 | 20.568023000 | XXXX    | 1       | xx           | Pd | 0.000 |
| Pd22 | 3.937171000 | 0.000000000 | 19.176038000 | XXXX    | 1       | xx           | Pd | 0.000 |
| Pd23 | 3.937171000 | 2.783972000 | 19.176038000 | XXXX    | 1       | xx           | Pd | 0.000 |
| Pd24 | 3.937171000 | 5.568028000 | 19.176038000 | XXXX    | 1       | xx           | Pd | 0.000 |
| Pd25 | 0.030552000 | 0.000585000 | 19.175585000 | XXXX    | 1       | xx           | Pd | 0.000 |
| Pd26 | 0.030552000 | 2.784640000 | 19.175585000 | XXXX    | 1       | xx           | Pd | 0.000 |
| Pd27 | 0.030474000 | 5.568612000 | 19.175585000 | XXXX    | 1       | xx           | Pd | 0.000 |
| Pd28 | 1.984491000 | 1.391777000 | 17.725601000 | XXXX    | 1       | xx           | Pd | 0.000 |
| Pd29 | 1.984413000 | 4.175749000 | 17.725148000 | XXXX    | 1       | xx           | Pd | 0.000 |
| Pd30 | 1.984334000 | 6.959638000 | 17.725148000 | XXXX    | 1       | xx           | Pd | 0.000 |
| Pd31 | 5.921662000 | 1.392362000 | 17.831631000 | XXXX    | 1       | xx           | Pd | 0.000 |
| Pd32 | 5.921426000 | 4.176251000 | 17.831178000 | XXXX    | 1       | xx           | Pd | 0.000 |
| Pd33 | 5.921505000 | 6.960139000 | 17.831178000 | XXXX    | 1       | xx           | Pd | 0.000 |
| Pd34 | 0.040002000 | 8.351749000 | 16.401585000 | XXXX    | 1       | xx           | Pd | 0.000 |
| Pd35 | 0.040159000 | 2.783638000 | 16.401585000 | XXXX    | 1       | xx           | Pd | 0.000 |
| Pd36 | 0.039844000 | 5.567527000 | 16.401132000 | XXXX    | 1       | xx           | Pd | 0.000 |
| Pd37 | 3.928115000 | 2.783388000 | 16.402491000 | XXXX    | 1       | xx           | Pd | 0.000 |
| Pd38 | 3.928036000 | 5.567193000 | 16.402038000 | XXXX    | 1       | xx           | Pd | 0.000 |
| Pd39 | 3.928351000 | 8.351499000 | 16.402944000 | XXXX    | 1       | xx           | Pd | 0.000 |
| Pd40 | 5.920323000 | 1.391026000 | 15.136474000 | XXXX    | 1       | xx           | Pd | 0.000 |
| Pd41 | 5.920087000 | 4.174831000 | 15.136020000 | XXXX    | 1       | xx           | Pd | 0.000 |
| Pd42 | 5.920008000 | 6.958803000 | 15.136020000 | XXXX    | 1       | xx           | Pd | 0.000 |
| H43  | 4.784448000 | 2.783509000 | 14.813653000 | XXXX    | 1       | xx           | H  | 0.000 |
| H44  | 4.784327000 | 5.567528000 | 14.813308000 | XXXX    | 1       | xx           | H  | 0.000 |
| H45  | 4.784472000 | 8.351801000 | 14.814017000 | XXXX    | 1       | xx           | H  | 0.000 |
| H46  | 1.083094000 | 1.397647000 | 16.146732000 | XXXX    | 1       | xx           | H  | 0.000 |
| H47  | 1.082973000 | 4.181726000 | 16.146330000 | XXXX    | 1       | xx           | H  | 0.000 |
| H48  | 1.082856000 | 6.965576000 | 16.146515000 | XXXX    | 1       | xx           | H  | 0.000 |
| H49  | 2.883673000 | 1.392031000 | 16.147297000 | XXXX    | 1       | xx           | H  | 0.000 |
| H50  | 2.883493000 | 4.175967000 | 16.146767000 | XXXX    | 1       | xx           | H  | 0.000 |
| H51  | 2.883790000 | 6.960290000 | 16.147130000 | XXXX    | 1       | xx           | H  | 0.000 |
| H52  | 7.056651000 | 8.350437000 | 14.813892000 | XXXX    | 1       | xx           | H  | 0.000 |
| H53  | 7.056827000 | 2.782554000 | 14.813815000 | XXXX    | 1       | xx           | H  | 0.000 |
| H54  | 7.056528000 | 5.566429000 | 14.813346000 | XXXX    | 1       | xx           | H  | 0.000 |
| Pd55 | 3.937436000 | 0.000515000 | 24.775895000 | XXXX    | 1       | xx           | Pd | 0.000 |
| Pd56 | 3.937412000 | 2.784530000 | 24.775805000 | XXXX    | 1       | xx           | Pd | 0.000 |
| Pd57 | 3.937432000 | 5.568543000 | 24.776028000 | XXXX    | 1       | xx           | Pd | 0.000 |
| Pd58 | 2.016582000 | 1.394042000 | 29.039665000 | XXXX    | 1       | xx           | Pd | 0.000 |
| Pd59 | 2.016435000 | 4.177533000 | 29.039795000 | XXXX    | 1       | xx           | Pd | 0.000 |
| Pd60 | 2.016459000 | 6.962066000 | 29.039805000 | XXXX    | 1       | xx           | Pd | 0.000 |
| Pd61 | 0.001097000 | 0.000361000 | 30.350024000 | XXXX    | 1       | xx           | Pd | 0.000 |
| Pd62 | 0.001077000 | 2.784416000 | 30.350055000 | XXXX    | 1       | xx           | Pd | 0.000 |
| Pd63 | 0.001086000 | 5.568389000 | 30.350003000 | XXXX    | 1       | xx           | Pd | 0.000 |
| Pd64 | 5.861679000 | 1.393696000 | 29.042750000 | XXXX    | 1       | xx           | Pd | 0.000 |

|      |             |             |              |        |    |    |       |
|------|-------------|-------------|--------------|--------|----|----|-------|
| Pd65 | 5.861717000 | 4.177735000 | 29.042743000 | XXXX 1 | xx | Pd | 0.000 |
| Pd66 | 5.861615000 | 6.961695000 | 29.042556000 | XXXX 1 | xx | Pd | 0.000 |
| Pd67 | 0.003386000 | 0.005744000 | 27.590458000 | XXXX 1 | xx | Pd | 0.000 |
| Pd68 | 0.003306000 | 2.789735000 | 27.590600000 | XXXX 1 | xx | Pd | 0.000 |
| Pd69 | 0.003537000 | 5.573760000 | 27.590314000 | XXXX 1 | xx | Pd | 0.000 |
| Pd70 | 1.978305000 | 1.393986000 | 26.193544000 | XXXX 1 | xx | Pd | 0.000 |
| Pd71 | 1.978205000 | 4.177801000 | 26.193402000 | XXXX 1 | xx | Pd | 0.000 |
| Pd72 | 1.978320000 | 6.961813000 | 26.193435000 | XXXX 1 | xx | Pd | 0.000 |
| Pd73 | 3.940755000 | 0.003058000 | 27.645799000 | XXXX 1 | xx | Pd | 0.000 |
| Pd74 | 3.940584000 | 2.786848000 | 27.645488000 | XXXX 1 | xx | Pd | 0.000 |
| Pd75 | 3.941833000 | 5.571712000 | 27.646016000 | XXXX 1 | xx | Pd | 0.000 |
| Pd76 | 5.897798000 | 1.393736000 | 26.189901000 | XXXX 1 | xx | Pd | 0.000 |
| Pd77 | 5.897719000 | 4.178005000 | 26.189905000 | XXXX 1 | xx | Pd | 0.000 |
| Pd78 | 5.897525000 | 6.961850000 | 26.190086000 | XXXX 1 | xx | Pd | 0.000 |
| end  |             |             |              |        |    |    |       |

### $H_{r_i}/Pd(110)$ ( $r_i = 0.25$ )

| PBC  | 7.8743      | 8.3520       | 45.3120      | 90.0000 | 90.0000 | 90.0000 (P1) |       |  |
|------|-------------|--------------|--------------|---------|---------|--------------|-------|--|
| Pd1  | 5.905756000 | 1.392028000  | 23.351992000 | XXXX 1  | xx      | Pd           | 0.000 |  |
| Pd2  | 5.905756000 | 4.176000000  | 23.351992000 | XXXX 1  | xx      | Pd           | 0.000 |  |
| Pd3  | 5.905756000 | 6.959972000  | 23.351992000 | XXXX 1  | xx      | Pd           | 0.000 |  |
| Pd4  | 1.968585000 | 1.392028000  | 23.351992000 | XXXX 1  | xx      | Pd           | 0.000 |  |
| Pd5  | 1.968585000 | 4.176000000  | 23.351992000 | XXXX 1  | xx      | Pd           | 0.000 |  |
| Pd6  | 1.968585000 | 6.959972000  | 23.351992000 | XXXX 1  | xx      | Pd           | 0.000 |  |
| Pd7  | 0.000000000 | 2.783972000  | 24.743977000 | XXXX 1  | xx      | Pd           | 0.000 |  |
| Pd8  | 0.000000000 | 5.568028000  | 24.743977000 | XXXX 1  | xx      | Pd           | 0.000 |  |
| Pd9  | 0.000000000 | 0.000000000  | 24.743977000 | XXXX 1  | xx      | Pd           | 0.000 |  |
| Pd10 | 0.000000000 | 0.000000000  | 21.960008000 | XXXX 1  | xx      | Pd           | 0.000 |  |
| Pd11 | 0.000000000 | 2.783972000  | 21.960008000 | XXXX 1  | xx      | Pd           | 0.000 |  |
| Pd12 | 0.000000000 | 5.568028000  | 21.960008000 | XXXX 1  | xx      | Pd           | 0.000 |  |
| Pd13 | 1.968585000 | 1.392028000  | 20.568023000 | XXXX 1  | xx      | Pd           | 0.000 |  |
| Pd14 | 1.968585000 | 4.176000000  | 20.568023000 | XXXX 1  | xx      | Pd           | 0.000 |  |
| Pd15 | 1.968585000 | 6.959972000  | 20.568023000 | XXXX 1  | xx      | Pd           | 0.000 |  |
| Pd16 | 3.937171000 | 0.000000000  | 21.960008000 | XXXX 1  | xx      | Pd           | 0.000 |  |
| Pd17 | 3.937171000 | 2.783972000  | 21.960008000 | XXXX 1  | xx      | Pd           | 0.000 |  |
| Pd18 | 3.937171000 | 5.568028000  | 21.960008000 | XXXX 1  | xx      | Pd           | 0.000 |  |
| Pd19 | 5.905756000 | 1.392028000  | 20.568023000 | XXXX 1  | xx      | Pd           | 0.000 |  |
| Pd20 | 5.905756000 | 4.176000000  | 20.568023000 | XXXX 1  | xx      | Pd           | 0.000 |  |
| Pd21 | 5.905756000 | 6.959972000  | 20.568023000 | XXXX 1  | xx      | Pd           | 0.000 |  |
| Pd22 | 3.937171000 | 0.000000000  | 19.176038000 | XXXX 1  | xx      | Pd           | 0.000 |  |
| Pd23 | 3.937171000 | 2.783972000  | 19.176038000 | XXXX 1  | xx      | Pd           | 0.000 |  |
| Pd24 | 3.937171000 | 5.568028000  | 19.176038000 | XXXX 1  | xx      | Pd           | 0.000 |  |
| Pd25 | 0.030552000 | 0.000585000  | 19.175585000 | XXXX 1  | xx      | Pd           | 0.000 |  |
| Pd26 | 0.030552000 | 2.784640000  | 19.175585000 | XXXX 1  | xx      | Pd           | 0.000 |  |
| Pd27 | 0.030474000 | 5.568612000  | 19.175585000 | XXXX 1  | xx      | Pd           | 0.000 |  |
| Pd28 | 1.984491000 | 1.391777000  | 17.725601000 | XXXX 1  | xx      | Pd           | 0.000 |  |
| Pd29 | 1.984413000 | 4.175749000  | 17.725148000 | XXXX 1  | xx      | Pd           | 0.000 |  |
| Pd30 | 1.984334000 | 6.959638000  | 17.725148000 | XXXX 1  | xx      | Pd           | 0.000 |  |
| Pd31 | 5.921662000 | 1.392362000  | 17.831631000 | XXXX 1  | xx      | Pd           | 0.000 |  |
| Pd32 | 5.921426000 | 4.176251000  | 17.831178000 | XXXX 1  | xx      | Pd           | 0.000 |  |
| Pd33 | 5.921505000 | 6.960139000  | 17.831178000 | XXXX 1  | xx      | Pd           | 0.000 |  |
| Pd34 | 0.040002000 | -0.000251000 | 16.401585000 | XXXX 1  | xx      | Pd           | 0.000 |  |
| Pd35 | 0.040159000 | 2.783638000  | 16.401585000 | XXXX 1  | xx      | Pd           | 0.000 |  |
| Pd36 | 0.039844000 | 5.567527000  | 16.401132000 | XXXX 1  | xx      | Pd           | 0.000 |  |
| Pd37 | 3.928115000 | 2.783388000  | 16.402491000 | XXXX 1  | xx      | Pd           | 0.000 |  |
| Pd38 | 3.928036000 | 5.567193000  | 16.402038000 | XXXX 1  | xx      | Pd           | 0.000 |  |
| Pd39 | 3.928351000 | -0.000501000 | 16.402944000 | XXXX 1  | xx      | Pd           | 0.000 |  |
| Pd40 | 5.920323000 | 1.391026000  | 15.136474000 | XXXX 1  | xx      | Pd           | 0.000 |  |
| Pd41 | 5.920087000 | 4.174831000  | 15.136020000 | XXXX 1  | xx      | Pd           | 0.000 |  |
| Pd42 | 5.920008000 | 6.958803000  | 15.136020000 | XXXX 1  | xx      | Pd           | 0.000 |  |
| H43  | 4.784448000 | 2.783509000  | 14.813653000 | XXXX 1  | xx      | H            | 0.000 |  |
| H44  | 4.784327000 | 5.567528000  | 14.813308000 | XXXX 1  | xx      | H            | 0.000 |  |
| H45  | 4.784472000 | 8.351801000  | 14.814017000 | XXXX 1  | xx      | H            | 0.000 |  |
| H46  | 1.083094000 | 1.397647000  | 16.146732000 | XXXX 1  | xx      | H            | 0.000 |  |
| H47  | 1.082973000 | 4.181726000  | 16.146330000 | XXXX 1  | xx      | H            | 0.000 |  |
| H48  | 1.082856000 | 6.965576000  | 16.146515000 | XXXX 1  | xx      | H            | 0.000 |  |
| H49  | 2.883673000 | 1.392031000  | 16.147297000 | XXXX 1  | xx      | H            | 0.000 |  |
| H50  | 2.883493000 | 4.175967000  | 16.146767000 | XXXX 1  | xx      | H            | 0.000 |  |



|      |              |             |              |      |   |    |    |       |
|------|--------------|-------------|--------------|------|---|----|----|-------|
| H51  | 2.883790000  | 6.960290000 | 16.147130000 | XXXX | 1 | xx | H  | 0.000 |
| H52  | 7.056651000  | 8.350437000 | 14.813892000 | XXXX | 1 | xx | H  | 0.000 |
| H53  | 7.056827000  | 2.782554000 | 14.813815000 | XXXX | 1 | xx | H  | 0.000 |
| H54  | 7.056528000  | 5.566429000 | 14.813346000 | XXXX | 1 | xx | H  | 0.000 |
| Pd55 | 3.937876000  | 8.351777000 | 24.772164000 | XXXX | 1 | xx | Pd | 0.000 |
| Pd56 | 3.937854000  | 2.784537000 | 24.769067000 | XXXX | 1 | xx | Pd | 0.000 |
| Pd57 | 3.937876000  | 5.567334000 | 24.769181000 | XXXX | 1 | xx | Pd | 0.000 |
| Pd58 | 2.075540000  | 1.394306000 | 29.031075000 | XXXX | 1 | xx | Pd | 0.000 |
| Pd59 | 2.078730000  | 4.176487000 | 29.031239000 | XXXX | 1 | xx | Pd | 0.000 |
| Pd60 | 2.077221000  | 6.959638000 | 29.029828000 | XXXX | 1 | xx | Pd | 0.000 |
| Pd61 | -0.000199000 | 8.351676000 | 30.433067000 | XXXX | 1 | xx | Pd | 0.000 |
| Pd62 | -0.000433000 | 2.787880000 | 30.432241000 | XXXX | 1 | xx | Pd | 0.000 |
| Pd63 | -0.000457000 | 5.566584000 | 30.432319000 | XXXX | 1 | xx | Pd | 0.000 |
| Pd64 | 5.801097000  | 1.394162000 | 29.028706000 | XXXX | 1 | xx | Pd | 0.000 |
| Pd65 | 5.798156000  | 4.176631000 | 29.029125000 | XXXX | 1 | xx | Pd | 0.000 |
| Pd66 | 5.799506000  | 6.959943000 | 29.027638000 | XXXX | 1 | xx | Pd | 0.000 |
| Pd67 | 0.001093000  | 8.352045000 | 27.613339000 | XXXX | 1 | xx | Pd | 0.000 |
| Pd68 | 0.001142000  | 2.785395000 | 27.610803000 | XXXX | 1 | xx | Pd | 0.000 |
| Pd69 | 0.001167000  | 5.566826000 | 27.610845000 | XXXX | 1 | xx | Pd | 0.000 |
| Pd70 | 1.954560000  | 1.389838000 | 26.177030000 | XXXX | 1 | xx | Pd | 0.000 |
| Pd71 | 1.953550000  | 4.176255000 | 26.175335000 | XXXX | 1 | xx | Pd | 0.000 |
| Pd72 | 1.956188000  | 6.963315000 | 26.178126000 | XXXX | 1 | xx | Pd | 0.000 |
| Pd73 | 3.935867000  | 8.354778000 | 27.595309000 | XXXX | 1 | xx | Pd | 0.000 |
| Pd74 | 3.935998000  | 2.787672000 | 27.584523000 | XXXX | 1 | xx | Pd | 0.000 |
| Pd75 | 3.936086000  | 5.569383000 | 27.584325000 | XXXX | 1 | xx | Pd | 0.000 |
| Pd76 | 5.918197000  | 1.389248000 | 26.177350000 | XXXX | 1 | xx | Pd | 0.000 |
| Pd77 | 5.919545000  | 4.176032000 | 26.175381000 | XXXX | 1 | xx | Pd | 0.000 |
| Pd78 | 5.916735000  | 6.963313000 | 26.178443000 | XXXX | 1 | xx | Pd | 0.000 |
| H79  | 1.197545000  | 1.393073000 | 30.581709000 | XXXX | 1 | xx | H  | 0.000 |
| H80  | 1.197004000  | 4.176652000 | 30.582539000 | XXXX | 1 | xx | H  | 0.000 |
| H81  | 1.197464000  | 6.960325000 | 30.581431000 | XXXX | 1 | xx | H  | 0.000 |
| H82  | 6.672669000  | 1.393060000 | 30.583812000 | XXXX | 1 | xx | H  | 0.000 |
| H83  | 6.673315000  | 4.176699000 | 30.584712000 | XXXX | 1 | xx | H  | 0.000 |
| H84  | 6.672762000  | 6.960454000 | 30.583555000 | XXXX | 1 | xx | H  | 0.000 |
| end  |              |             |              |      |   |    |    |       |

**$H_{r_i}/Pd(110)$  ( $r_i = 0.375$ )**

| PBC  | 7.8743      | 8.3520      | 45.3120      | 90.0000 | 90.0000 | 90.0000 (P1) |    |       |
|------|-------------|-------------|--------------|---------|---------|--------------|----|-------|
| Pd1  | 5.905756000 | 1.392028000 | 23.351992000 | XXXX    | 1       | xx           | Pd | 0.000 |
| Pd2  | 5.905756000 | 4.176000000 | 23.351992000 | XXXX    | 1       | xx           | Pd | 0.000 |
| Pd3  | 5.905756000 | 6.959972000 | 23.351992000 | XXXX    | 1       | xx           | Pd | 0.000 |
| Pd4  | 1.968585000 | 1.392028000 | 23.351992000 | XXXX    | 1       | xx           | Pd | 0.000 |
| Pd5  | 1.968585000 | 4.176000000 | 23.351992000 | XXXX    | 1       | xx           | Pd | 0.000 |
| Pd6  | 1.968585000 | 6.959972000 | 23.351992000 | XXXX    | 1       | xx           | Pd | 0.000 |
| Pd7  | 0.000000000 | 2.783972000 | 24.743977000 | XXXX    | 1       | xx           | Pd | 0.000 |
| Pd8  | 0.000000000 | 5.568028000 | 24.743977000 | XXXX    | 1       | xx           | Pd | 0.000 |
| Pd9  | 0.000000000 | 0.000000000 | 24.743977000 | XXXX    | 1       | xx           | Pd | 0.000 |
| Pd10 | 0.000000000 | 0.000000000 | 21.960008000 | XXXX    | 1       | xx           | Pd | 0.000 |
| Pd11 | 0.000000000 | 2.783972000 | 21.960008000 | XXXX    | 1       | xx           | Pd | 0.000 |
| Pd12 | 0.000000000 | 5.568028000 | 21.960008000 | XXXX    | 1       | xx           | Pd | 0.000 |
| Pd13 | 1.968585000 | 1.392028000 | 20.568023000 | XXXX    | 1       | xx           | Pd | 0.000 |
| Pd14 | 1.968585000 | 4.176000000 | 20.568023000 | XXXX    | 1       | xx           | Pd | 0.000 |
| Pd15 | 1.968585000 | 6.959972000 | 20.568023000 | XXXX    | 1       | xx           | Pd | 0.000 |
| Pd16 | 3.937171000 | 0.000000000 | 21.960008000 | XXXX    | 1       | xx           | Pd | 0.000 |
| Pd17 | 3.937171000 | 2.783972000 | 21.960008000 | XXXX    | 1       | xx           | Pd | 0.000 |
| Pd18 | 3.937171000 | 5.568028000 | 21.960008000 | XXXX    | 1       | xx           | Pd | 0.000 |
| Pd19 | 5.905756000 | 1.392028000 | 20.568023000 | XXXX    | 1       | xx           | Pd | 0.000 |
| Pd20 | 5.905756000 | 4.176000000 | 20.568023000 | XXXX    | 1       | xx           | Pd | 0.000 |
| Pd21 | 5.905756000 | 6.959972000 | 20.568023000 | XXXX    | 1       | xx           | Pd | 0.000 |
| Pd22 | 3.937171000 | 0.000000000 | 19.176038000 | XXXX    | 1       | xx           | Pd | 0.000 |
| Pd23 | 3.937171000 | 2.783972000 | 19.176038000 | XXXX    | 1       | xx           | Pd | 0.000 |
| Pd24 | 3.937171000 | 5.568028000 | 19.176038000 | XXXX    | 1       | xx           | Pd | 0.000 |
| Pd25 | 0.030552000 | 0.000585000 | 19.175585000 | XXXX    | 1       | xx           | Pd | 0.000 |
| Pd26 | 0.030552000 | 2.784640000 | 19.175585000 | XXXX    | 1       | xx           | Pd | 0.000 |
| Pd27 | 0.030474000 | 5.568612000 | 19.175585000 | XXXX    | 1       | xx           | Pd | 0.000 |
| Pd28 | 1.984491000 | 1.391777000 | 17.725601000 | XXXX    | 1       | xx           | Pd | 0.000 |
| Pd29 | 1.984413000 | 4.175749000 | 17.725148000 | XXXX    | 1       | xx           | Pd | 0.000 |
| Pd30 | 1.984334000 | 6.959638000 | 17.725148000 | XXXX    | 1       | xx           | Pd | 0.000 |
| Pd31 | 5.921662000 | 1.392362000 | 17.831631000 | XXXX    | 1       | xx           | Pd | 0.000 |

|      |              |             |              |        |    |    |       |
|------|--------------|-------------|--------------|--------|----|----|-------|
| Pd32 | 5.921426000  | 4.176251000 | 17.831178000 | XXXX 1 | xx | Pd | 0.000 |
| Pd33 | 5.921505000  | 6.960139000 | 17.831178000 | XXXX 1 | xx | Pd | 0.000 |
| Pd34 | 0.040002000  | 8.351749000 | 16.401585000 | XXXX 1 | xx | Pd | 0.000 |
| Pd35 | 0.040159000  | 2.783638000 | 16.401585000 | XXXX 1 | xx | Pd | 0.000 |
| Pd36 | 0.039844000  | 5.567527000 | 16.401132000 | XXXX 1 | xx | Pd | 0.000 |
| Pd37 | 3.928115000  | 2.783388000 | 16.402491000 | XXXX 1 | xx | Pd | 0.000 |
| Pd38 | 3.928036000  | 5.567193000 | 16.402038000 | XXXX 1 | xx | Pd | 0.000 |
| Pd39 | 3.928351000  | 8.351499000 | 16.402944000 | XXXX 1 | xx | Pd | 0.000 |
| Pd40 | 5.920323000  | 1.391026000 | 15.136474000 | XXXX 1 | xx | Pd | 0.000 |
| Pd41 | 5.920087000  | 4.174831000 | 15.136020000 | XXXX 1 | xx | Pd | 0.000 |
| Pd42 | 5.920008000  | 6.958803000 | 15.136020000 | XXXX 1 | xx | Pd | 0.000 |
| H43  | 4.784448000  | 2.783509000 | 14.813653000 | XXXX 1 | xx | H  | 0.000 |
| H44  | 4.784327000  | 5.567528000 | 14.813308000 | XXXX 1 | xx | H  | 0.000 |
| H45  | 4.784472000  | 8.351801000 | 14.814017000 | XXXX 1 | xx | H  | 0.000 |
| H46  | 1.083094000  | 1.397647000 | 16.146732000 | XXXX 1 | xx | H  | 0.000 |
| H47  | 1.082973000  | 4.181726000 | 16.146330000 | XXXX 1 | xx | H  | 0.000 |
| H48  | 1.082856000  | 6.965576000 | 16.146515000 | XXXX 1 | xx | H  | 0.000 |
| H49  | 2.883673000  | 1.392031000 | 16.147297000 | XXXX 1 | xx | H  | 0.000 |
| H50  | 2.883493000  | 4.175967000 | 16.146767000 | XXXX 1 | xx | H  | 0.000 |
| H51  | 2.883790000  | 6.960290000 | 16.147130000 | XXXX 1 | xx | H  | 0.000 |
| H52  | 7.056651000  | 8.350437000 | 14.813892000 | XXXX 1 | xx | H  | 0.000 |
| H53  | 7.056827000  | 2.782554000 | 14.813815000 | XXXX 1 | xx | H  | 0.000 |
| H54  | 7.056528000  | 5.566429000 | 14.813346000 | XXXX 1 | xx | H  | 0.000 |
| Pd55 | 3.935631000  | 8.353426000 | 24.786501000 | XXXX 1 | xx | Pd | 0.000 |
| Pd56 | 3.935845000  | 2.786337000 | 24.787100000 | XXXX 1 | xx | Pd | 0.000 |
| Pd57 | 3.935830000  | 5.568245000 | 24.786607000 | XXXX 1 | xx | Pd | 0.000 |
| Pd58 | 1.872731000  | 4.177747000 | 29.125158000 | XXXX 1 | xx | Pd | 0.000 |
| Pd59 | 5.994154000  | 1.392897000 | 29.123145000 | XXXX 1 | xx | Pd | 0.000 |
| Pd60 | 3.935962000  | 2.785770000 | 30.544774000 | XXXX 1 | xx | Pd | 0.000 |
| Pd61 | 5.994513000  | 6.962984000 | 29.121433000 | XXXX 1 | xx | Pd | 0.000 |
| Pd62 | 1.871949000  | 6.961925000 | 29.127817000 | XXXX 1 | xx | Pd | 0.000 |
| Pd63 | 3.926917000  | 8.346903000 | 30.552540000 | XXXX 1 | xx | Pd | 0.000 |
| Pd64 | 3.936091000  | 5.567719000 | 30.544909000 | XXXX 1 | xx | Pd | 0.000 |
| Pd65 | 1.871669000  | 1.394589000 | 29.129591000 | XXXX 1 | xx | Pd | 0.000 |
| Pd66 | 5.996308000  | 4.177267000 | 29.120293000 | XXXX 1 | xx | Pd | 0.000 |
| Pd67 | 7.872600000  | 5.571608000 | 27.586017000 | XXXX 1 | xx | Pd | 0.000 |
| Pd68 | 7.873037000  | 8.360224000 | 27.594414000 | XXXX 1 | xx | Pd | 0.000 |
| Pd69 | 7.872864000  | 2.788957000 | 27.586512000 | XXXX 1 | xx | Pd | 0.000 |
| Pd70 | 1.987819000  | 1.393133000 | 26.201810000 | XXXX 1 | xx | Pd | 0.000 |
| Pd71 | 1.987862000  | 4.179045000 | 26.201349000 | XXXX 1 | xx | Pd | 0.000 |
| Pd72 | 1.987309000  | 6.965219000 | 26.202075000 | XXXX 1 | xx | Pd | 0.000 |
| Pd73 | 3.934257000  | 5.571540000 | 27.679426000 | XXXX 1 | xx | Pd | 0.000 |
| Pd74 | 3.930906000  | 0.006604000 | 27.685151000 | XXXX 1 | xx | Pd | 0.000 |
| Pd75 | 3.934219000  | 2.788992000 | 27.679905000 | XXXX 1 | xx | Pd | 0.000 |
| Pd76 | 5.882173000  | 6.965629000 | 26.201771000 | XXXX 1 | xx | Pd | 0.000 |
| Pd77 | 5.881739000  | 1.392442000 | 26.201407000 | XXXX 1 | xx | Pd | 0.000 |
| Pd78 | 5.882235000  | 4.178861000 | 26.200068000 | XXXX 1 | xx | Pd | 0.000 |
| H79  | 5.135716000  | 4.174834000 | 30.697954000 | XXXX 1 | xx | H  | 0.000 |
| H80  | -0.003643000 | 6.960673000 | 28.896063000 | XXXX 1 | xx | H  | 0.000 |
| H81  | 2.743167000  | 4.174648000 | 30.701533000 | XXXX 1 | xx | H  | 0.000 |
| H82  | -0.003704000 | 1.394504000 | 28.897958000 | XXXX 1 | xx | H  | 0.000 |
| H83  | 5.130341000  | 1.389416000 | 30.701778000 | XXXX 1 | xx | H  | 0.000 |
| H84  | 2.739228000  | 6.954253000 | 30.705180000 | XXXX 1 | xx | H  | 0.000 |
| H85  | 2.739802000  | 1.393732000 | 30.706733000 | XXXX 1 | xx | H  | 0.000 |
| H86  | 5.131108000  | 6.959327000 | 30.700048000 | XXXX 1 | xx | H  | 0.000 |
| H87  | -0.002173000 | 4.177744000 | 28.896321000 | XXXX 1 | xx | H  | 0.000 |
| end  |              |             |              |        |    |    |       |

$H_{r_i}/Pd(110) (r_i = 0.5)$

|     |             |             |              |         |         |              |       |
|-----|-------------|-------------|--------------|---------|---------|--------------|-------|
| PBC | 7.8743      | 8.3520      | 45.3120      | 90.0000 | 90.0000 | 90.0000 (P1) |       |
| Pd1 | 5.905756000 | 1.392028000 | 23.351992000 | XXXX 1  | xx      | Pd           | 0.000 |
| Pd2 | 5.905756000 | 4.176000000 | 23.351992000 | XXXX 1  | xx      | Pd           | 0.000 |
| Pd3 | 5.905756000 | 6.959972000 | 23.351992000 | XXXX 1  | xx      | Pd           | 0.000 |
| Pd4 | 1.968585000 | 1.392028000 | 23.351992000 | XXXX 1  | xx      | Pd           | 0.000 |
| Pd5 | 1.968585000 | 4.176000000 | 23.351992000 | XXXX 1  | xx      | Pd           | 0.000 |
| Pd6 | 1.968585000 | 6.959972000 | 23.351992000 | XXXX 1  | xx      | Pd           | 0.000 |
| Pd7 | 0.000000000 | 2.783972000 | 24.743977000 | XXXX 1  | xx      | Pd           | 0.000 |
| Pd8 | 0.000000000 | 5.568028000 | 24.743977000 | XXXX 1  | xx      | Pd           | 0.000 |
| Pd9 | 0.000000000 | 0.000000000 | 24.743977000 | XXXX 1  | xx      | Pd           | 0.000 |

|      |             |             |              |        |    |    |       |
|------|-------------|-------------|--------------|--------|----|----|-------|
| Pd10 | 0.00000000  | 0.00000000  | 21.96000800  | XXXX 1 | xx | Pd | 0.000 |
| Pd11 | 0.00000000  | 2.783972000 | 21.96000800  | XXXX 1 | xx | Pd | 0.000 |
| Pd12 | 0.00000000  | 5.568028000 | 21.96000800  | XXXX 1 | xx | Pd | 0.000 |
| Pd13 | 1.968585000 | 1.392028000 | 20.568023000 | XXXX 1 | xx | Pd | 0.000 |
| Pd14 | 1.968585000 | 4.176000000 | 20.568023000 | XXXX 1 | xx | Pd | 0.000 |
| Pd15 | 1.968585000 | 6.959972000 | 20.568023000 | XXXX 1 | xx | Pd | 0.000 |
| Pd16 | 3.937171000 | 0.000000000 | 21.960008000 | XXXX 1 | xx | Pd | 0.000 |
| Pd17 | 3.937171000 | 2.783972000 | 21.960008000 | XXXX 1 | xx | Pd | 0.000 |
| Pd18 | 3.937171000 | 5.568028000 | 21.960008000 | XXXX 1 | xx | Pd | 0.000 |
| Pd19 | 5.905756000 | 1.392028000 | 20.568023000 | XXXX 1 | xx | Pd | 0.000 |
| Pd20 | 5.905756000 | 4.176000000 | 20.568023000 | XXXX 1 | xx | Pd | 0.000 |
| Pd21 | 5.905756000 | 6.959972000 | 20.568023000 | XXXX 1 | xx | Pd | 0.000 |
| Pd22 | 3.937171000 | 0.000000000 | 19.176038000 | XXXX 1 | xx | Pd | 0.000 |
| Pd23 | 3.937171000 | 2.783972000 | 19.176038000 | XXXX 1 | xx | Pd | 0.000 |
| Pd24 | 3.937171000 | 5.568028000 | 19.176038000 | XXXX 1 | xx | Pd | 0.000 |
| Pd25 | 0.030552000 | 0.000585000 | 19.175585000 | XXXX 1 | xx | Pd | 0.000 |
| Pd26 | 0.030552000 | 2.784640000 | 19.175585000 | XXXX 1 | xx | Pd | 0.000 |
| Pd27 | 0.030474000 | 5.568612000 | 19.175585000 | XXXX 1 | xx | Pd | 0.000 |
| Pd28 | 1.984491000 | 1.391777000 | 17.725601000 | XXXX 1 | xx | Pd | 0.000 |
| Pd29 | 1.984413000 | 4.175749000 | 17.725148000 | XXXX 1 | xx | Pd | 0.000 |
| Pd30 | 1.984334000 | 6.959638000 | 17.725148000 | XXXX 1 | xx | Pd | 0.000 |
| Pd31 | 5.921662000 | 1.392362000 | 17.831631000 | XXXX 1 | xx | Pd | 0.000 |
| Pd32 | 5.921426000 | 4.176251000 | 17.831178000 | XXXX 1 | xx | Pd | 0.000 |
| Pd33 | 5.921505000 | 6.960139000 | 17.831178000 | XXXX 1 | xx | Pd | 0.000 |
| Pd34 | 0.040002000 | 8.351749000 | 16.401585000 | XXXX 1 | xx | Pd | 0.000 |
| Pd35 | 0.040159000 | 2.783638000 | 16.401585000 | XXXX 1 | xx | Pd | 0.000 |
| Pd36 | 0.039844000 | 5.567527000 | 16.401132000 | XXXX 1 | xx | Pd | 0.000 |
| Pd37 | 3.928115000 | 2.783388000 | 16.402491000 | XXXX 1 | xx | Pd | 0.000 |
| Pd38 | 3.928036000 | 5.567193000 | 16.402038000 | XXXX 1 | xx | Pd | 0.000 |
| Pd39 | 3.928351000 | 8.351499000 | 16.402944000 | XXXX 1 | xx | Pd | 0.000 |
| Pd40 | 5.920323000 | 1.391026000 | 15.136474000 | XXXX 1 | xx | Pd | 0.000 |
| Pd41 | 5.920087000 | 4.174831000 | 15.136020000 | XXXX 1 | xx | Pd | 0.000 |
| Pd42 | 5.920008000 | 6.958803000 | 15.136020000 | XXXX 1 | xx | Pd | 0.000 |
| H43  | 4.784448000 | 2.783509000 | 14.813653000 | XXXX 1 | xx | H  | 0.000 |
| H44  | 4.784327000 | 5.567528000 | 14.813308000 | XXXX 1 | xx | H  | 0.000 |
| H45  | 4.784472000 | 8.351801000 | 14.814017000 | XXXX 1 | xx | H  | 0.000 |
| H46  | 1.083094000 | 1.397647000 | 16.146732000 | XXXX 1 | xx | H  | 0.000 |
| H47  | 1.082973000 | 4.181726000 | 16.146330000 | XXXX 1 | xx | H  | 0.000 |
| H48  | 1.082856000 | 6.965576000 | 16.146515000 | XXXX 1 | xx | H  | 0.000 |
| H49  | 2.883673000 | 1.392031000 | 16.147297000 | XXXX 1 | xx | H  | 0.000 |
| H50  | 2.883493000 | 4.175967000 | 16.146767000 | XXXX 1 | xx | H  | 0.000 |
| H51  | 2.883790000 | 6.960290000 | 16.147130000 | XXXX 1 | xx | H  | 0.000 |
| H52  | 7.056651000 | 8.350437000 | 14.813892000 | XXXX 1 | xx | H  | 0.000 |
| H53  | 7.056827000 | 2.782554000 | 14.813815000 | XXXX 1 | xx | H  | 0.000 |
| H54  | 7.056528000 | 5.566429000 | 14.813346000 | XXXX 1 | xx | H  | 0.000 |
| Pd55 | 3.954560000 | 8.349423000 | 24.789523000 | XXXX 1 | xx | Pd | 0.000 |
| Pd56 | 3.954317000 | 2.781400000 | 24.789535000 | XXXX 1 | xx | Pd | 0.000 |
| Pd57 | 3.954535000 | 5.565443000 | 24.789588000 | XXXX 1 | xx | Pd | 0.000 |
| Pd58 | 1.750997000 | 4.164671000 | 29.239422000 | XXXX 1 | xx | Pd | 0.000 |
| Pd59 | 1.751068000 | 6.948732000 | 29.239527000 | XXXX 1 | xx | Pd | 0.000 |
| Pd60 | 1.750888000 | 1.380788000 | 29.239255000 | XXXX 1 | xx | Pd | 0.000 |
| Pd61 | 6.041667000 | 4.164470000 | 29.202234000 | XXXX 1 | xx | Pd | 0.000 |
| Pd62 | 6.041659000 | 6.948280000 | 29.202245000 | XXXX 1 | xx | Pd | 0.000 |
| Pd63 | 6.041917000 | 1.379990000 | 29.201906000 | XXXX 1 | xx | Pd | 0.000 |
| Pd64 | 3.916196000 | 8.337996000 | 30.556516000 | XXXX 1 | xx | Pd | 0.000 |
| Pd65 | 3.916131000 | 2.770920000 | 30.556546000 | XXXX 1 | xx | Pd | 0.000 |
| Pd66 | 3.916245000 | 5.554895000 | 30.556543000 | XXXX 1 | xx | Pd | 0.000 |
| Pd67 | 0.016351000 | 5.559254000 | 27.592486000 | XXXX 1 | xx | Pd | 0.000 |
| Pd68 | 0.016193000 | 8.343452000 | 27.592648000 | XXXX 1 | xx | Pd | 0.000 |
| Pd69 | 0.016402000 | 2.775072000 | 27.592533000 | XXXX 1 | xx | Pd | 0.000 |
| Pd70 | 1.966541000 | 1.383617000 | 26.170244000 | XXXX 1 | xx | Pd | 0.000 |
| Pd71 | 1.966516000 | 4.167716000 | 26.170211000 | XXXX 1 | xx | Pd | 0.000 |
| Pd72 | 1.966540000 | 6.951429000 | 26.170177000 | XXXX 1 | xx | Pd | 0.000 |
| Pd73 | 4.024138000 | 8.343384000 | 27.705538000 | XXXX 1 | xx | Pd | 0.000 |
| Pd74 | 4.024085000 | 2.775274000 | 27.705530000 | XXXX 1 | xx | Pd | 0.000 |
| Pd75 | 4.024144000 | 5.559267000 | 27.705561000 | XXXX 1 | xx | Pd | 0.000 |
| Pd76 | 5.922707000 | 1.386094000 | 26.196117000 | XXXX 1 | xx | Pd | 0.000 |
| Pd77 | 5.922657000 | 4.170193000 | 26.196058000 | XXXX 1 | xx | Pd | 0.000 |
| Pd78 | 5.922670000 | 6.954139000 | 26.196083000 | XXXX 1 | xx | Pd | 0.000 |

|     |             |             |              |      |   |    |   |       |
|-----|-------------|-------------|--------------|------|---|----|---|-------|
| H79 | 7.233313000 | 2.771363000 | 29.266114000 | XXXX | 1 | xx | H | 0.000 |
| H80 | 2.738432000 | 4.161935000 | 30.745820000 | XXXX | 1 | xx | H | 0.000 |
| H81 | 5.086864000 | 6.945794000 | 30.739584000 | XXXX | 1 | xx | H | 0.000 |
| H82 | 2.807386000 | 4.165366000 | 27.781998000 | XXXX | 1 | xx | H | 0.000 |
| H83 | 2.807380000 | 6.949359000 | 27.781994000 | XXXX | 1 | xx | H | 0.000 |
| H84 | 2.738424000 | 1.377976000 | 30.745857000 | XXXX | 1 | xx | H | 0.000 |
| H85 | 7.233296000 | 5.555363000 | 29.266117000 | XXXX | 1 | xx | H | 0.000 |
| H86 | 2.738490000 | 6.946000000 | 30.745767000 | XXXX | 1 | xx | H | 0.000 |
| H87 | 5.086919000 | 4.161794000 | 30.739619000 | XXXX | 1 | xx | H | 0.000 |
| H88 | 5.086995000 | 1.377819000 | 30.739704000 | XXXX | 1 | xx | H | 0.000 |
| H89 | 7.233194000 | 8.339444000 | 29.266008000 | XXXX | 1 | xx | H | 0.000 |
| H90 | 2.807399000 | 1.381370000 | 27.781960000 | XXXX | 1 | xx | H | 0.000 |
| end |             |             |              |      |   |    |   |       |

**$H_{r_i}/Pd(110)$  ( $r_i = 0.625$ )**

|      |             |             |              |      |   |    |    |       |
|------|-------------|-------------|--------------|------|---|----|----|-------|
| Pd1  | 5.905756000 | 1.392028000 | 23.351992000 | XXXX | 1 | xx | Pd | 0.000 |
| Pd2  | 5.905756000 | 4.176000000 | 23.351992000 | XXXX | 1 | xx | Pd | 0.000 |
| Pd3  | 5.905756000 | 6.959972000 | 23.351992000 | XXXX | 1 | xx | Pd | 0.000 |
| Pd4  | 1.968585000 | 1.392028000 | 23.351992000 | XXXX | 1 | xx | Pd | 0.000 |
| Pd5  | 1.968585000 | 4.176000000 | 23.351992000 | XXXX | 1 | xx | Pd | 0.000 |
| Pd6  | 1.968585000 | 6.959972000 | 23.351992000 | XXXX | 1 | xx | Pd | 0.000 |
| Pd7  | 0.000000000 | 2.783972000 | 24.743977000 | XXXX | 1 | xx | Pd | 0.000 |
| Pd8  | 0.000000000 | 5.568028000 | 24.743977000 | XXXX | 1 | xx | Pd | 0.000 |
| Pd9  | 0.000000000 | 0.000000000 | 24.743977000 | XXXX | 1 | xx | Pd | 0.000 |
| Pd10 | 0.000000000 | 0.000000000 | 21.960008000 | XXXX | 1 | xx | Pd | 0.000 |
| Pd11 | 0.000000000 | 2.783972000 | 21.960008000 | XXXX | 1 | xx | Pd | 0.000 |
| Pd12 | 0.000000000 | 5.568028000 | 21.960008000 | XXXX | 1 | xx | Pd | 0.000 |
| Pd13 | 1.968585000 | 1.392028000 | 20.568023000 | XXXX | 1 | xx | Pd | 0.000 |
| Pd14 | 1.968585000 | 4.176000000 | 20.568023000 | XXXX | 1 | xx | Pd | 0.000 |
| Pd15 | 1.968585000 | 6.959972000 | 20.568023000 | XXXX | 1 | xx | Pd | 0.000 |
| Pd16 | 3.937171000 | 0.000000000 | 21.960008000 | XXXX | 1 | xx | Pd | 0.000 |
| Pd17 | 3.937171000 | 2.783972000 | 21.960008000 | XXXX | 1 | xx | Pd | 0.000 |
| Pd18 | 3.937171000 | 5.568028000 | 21.960008000 | XXXX | 1 | xx | Pd | 0.000 |
| Pd19 | 5.905756000 | 1.392028000 | 20.568023000 | XXXX | 1 | xx | Pd | 0.000 |
| Pd20 | 5.905756000 | 4.176000000 | 20.568023000 | XXXX | 1 | xx | Pd | 0.000 |
| Pd21 | 5.905756000 | 6.959972000 | 20.568023000 | XXXX | 1 | xx | Pd | 0.000 |
| Pd22 | 3.937171000 | 0.000000000 | 19.176038000 | XXXX | 1 | xx | Pd | 0.000 |
| Pd23 | 3.937171000 | 2.783972000 | 19.176038000 | XXXX | 1 | xx | Pd | 0.000 |
| Pd24 | 3.937171000 | 5.568028000 | 19.176038000 | XXXX | 1 | xx | Pd | 0.000 |
| Pd25 | 0.030552000 | 0.000585000 | 19.175585000 | XXXX | 1 | xx | Pd | 0.000 |
| Pd26 | 0.030552000 | 2.784640000 | 19.175585000 | XXXX | 1 | xx | Pd | 0.000 |
| Pd27 | 0.030474000 | 5.568612000 | 19.175585000 | XXXX | 1 | xx | Pd | 0.000 |
| Pd28 | 1.984491000 | 1.391777000 | 17.725601000 | XXXX | 1 | xx | Pd | 0.000 |
| Pd29 | 1.984413000 | 4.175749000 | 17.725148000 | XXXX | 1 | xx | Pd | 0.000 |
| Pd30 | 1.984334000 | 6.959638000 | 17.725148000 | XXXX | 1 | xx | Pd | 0.000 |
| Pd31 | 5.921662000 | 1.392362000 | 17.831631000 | XXXX | 1 | xx | Pd | 0.000 |
| Pd32 | 5.921426000 | 4.176251000 | 17.831178000 | XXXX | 1 | xx | Pd | 0.000 |
| Pd33 | 5.921505000 | 6.960139000 | 17.831178000 | XXXX | 1 | xx | Pd | 0.000 |
| Pd34 | 0.040002000 | 8.351749000 | 16.401585000 | XXXX | 1 | xx | Pd | 0.000 |
| Pd35 | 0.040159000 | 2.783638000 | 16.401585000 | XXXX | 1 | xx | Pd | 0.000 |
| Pd36 | 0.039844000 | 5.567527000 | 16.401132000 | XXXX | 1 | xx | Pd | 0.000 |
| Pd37 | 3.928115000 | 2.783388000 | 16.402491000 | XXXX | 1 | xx | Pd | 0.000 |
| Pd38 | 3.928036000 | 5.567193000 | 16.402038000 | XXXX | 1 | xx | Pd | 0.000 |
| Pd39 | 3.928351000 | 8.351499000 | 16.402944000 | XXXX | 1 | xx | Pd | 0.000 |
| Pd40 | 5.920323000 | 1.391026000 | 15.136474000 | XXXX | 1 | xx | Pd | 0.000 |
| Pd41 | 5.920087000 | 4.174831000 | 15.136020000 | XXXX | 1 | xx | Pd | 0.000 |
| Pd42 | 5.920008000 | 6.958803000 | 15.136020000 | XXXX | 1 | xx | Pd | 0.000 |
| H43  | 4.784448000 | 2.783509000 | 14.813653000 | XXXX | 1 | xx | H  | 0.000 |
| H44  | 4.784327000 | 5.567528000 | 14.813308000 | XXXX | 1 | xx | H  | 0.000 |
| H45  | 4.784472000 | 8.351801000 | 14.814017000 | XXXX | 1 | xx | H  | 0.000 |
| H46  | 1.083094000 | 1.397647000 | 16.146732000 | XXXX | 1 | xx | H  | 0.000 |
| H47  | 1.082973000 | 4.181726000 | 16.146330000 | XXXX | 1 | xx | H  | 0.000 |
| H48  | 1.082856000 | 6.965576000 | 16.146515000 | XXXX | 1 | xx | H  | 0.000 |
| H49  | 2.883673000 | 1.392031000 | 16.147297000 | XXXX | 1 | xx | H  | 0.000 |
| H50  | 2.883493000 | 4.175967000 | 16.146767000 | XXXX | 1 | xx | H  | 0.000 |
| H51  | 2.883790000 | 6.960290000 | 16.147130000 | XXXX | 1 | xx | H  | 0.000 |
| H52  | 7.056651000 | 8.350437000 | 14.813892000 | XXXX | 1 | xx | H  | 0.000 |
| H53  | 7.056827000 | 2.782554000 | 14.813815000 | XXXX | 1 | xx | H  | 0.000 |
| H54  | 7.056528000 | 5.566429000 | 14.813346000 | XXXX | 1 | xx | H  | 0.000 |

|      |             |             |              |        |    |    |       |
|------|-------------|-------------|--------------|--------|----|----|-------|
| Pd55 | 3.924928000 | 0.000773000 | 24.760223000 | XXXX 1 | xx | Pd | 0.000 |
| Pd56 | 3.924736000 | 2.785184000 | 24.760131000 | XXXX 1 | xx | Pd | 0.000 |
| Pd57 | 3.924745000 | 5.569204000 | 24.759843000 | XXXX 1 | xx | Pd | 0.000 |
| Pd58 | 1.760438000 | 6.965317000 | 29.383990000 | XXXX 1 | xx | Pd | 0.000 |
| Pd59 | 1.760294000 | 1.397451000 | 29.384561000 | XXXX 1 | xx | Pd | 0.000 |
| Pd60 | 1.761655000 | 4.181803000 | 29.381818000 | XXXX 1 | xx | Pd | 0.000 |
| Pd61 | 6.064872000 | 4.182404000 | 29.286174000 | XXXX 1 | xx | Pd | 0.000 |
| Pd62 | 6.065291000 | 6.966079000 | 29.287201000 | XXXX 1 | xx | Pd | 0.000 |
| Pd63 | 6.066997000 | 1.397922000 | 29.288667000 | XXXX 1 | xx | Pd | 0.000 |
| Pd64 | 3.952197000 | 0.007837000 | 30.698119000 | XXXX 1 | xx | Pd | 0.000 |
| Pd65 | 3.951834000 | 2.791362000 | 30.697141000 | XXXX 1 | xx | Pd | 0.000 |
| Pd66 | 3.951690000 | 5.575564000 | 30.696847000 | XXXX 1 | xx | Pd | 0.000 |
| Pd67 | 0.076065000 | 5.572132000 | 27.689466000 | XXXX 1 | xx | Pd | 0.000 |
| Pd68 | 0.074092000 | 0.004539000 | 27.691831000 | XXXX 1 | xx | Pd | 0.000 |
| Pd69 | 0.075250000 | 2.787529000 | 27.690410000 | XXXX 1 | xx | Pd | 0.000 |
| Pd70 | 1.959934000 | 1.394379000 | 26.202137000 | XXXX 1 | xx | Pd | 0.000 |
| Pd71 | 1.960153000 | 4.177870000 | 26.200896000 | XXXX 1 | xx | Pd | 0.000 |
| Pd72 | 1.960481000 | 6.962569000 | 26.201764000 | XXXX 1 | xx | Pd | 0.000 |
| Pd73 | 3.961758000 | 0.004018000 | 27.881437000 | XXXX 1 | xx | Pd | 0.000 |
| Pd74 | 3.961447000 | 2.788263000 | 27.880355000 | XXXX 1 | xx | Pd | 0.000 |
| Pd75 | 3.960674000 | 5.572141000 | 27.880094000 | XXXX 1 | xx | Pd | 0.000 |
| Pd76 | 6.005380000 | 1.394337000 | 26.271801000 | XXXX 1 | xx | Pd | 0.000 |
| Pd77 | 6.004791000 | 4.178256000 | 26.271219000 | XXXX 1 | xx | Pd | 0.000 |
| Pd78 | 6.004755000 | 6.963249000 | 26.271483000 | XXXX 1 | xx | Pd | 0.000 |
| H79  | 5.127259000 | 6.967639000 | 30.840284000 | XXXX 1 | xx | H  | 0.000 |
| H80  | 4.821906000 | 2.786622000 | 26.297787000 | XXXX 1 | xx | H  | 0.000 |
| H81  | 7.256914000 | 2.793149000 | 29.350546000 | XXXX 1 | xx | H  | 0.000 |
| H82  | 4.821281000 | 0.002977000 | 26.298675000 | XXXX 1 | xx | H  | 0.000 |
| H83  | 2.719338000 | 4.180047000 | 27.829845000 | XXXX 1 | xx | H  | 0.000 |
| H84  | 2.775898000 | 6.968335000 | 30.875867000 | XXXX 1 | xx | H  | 0.000 |
| H85  | 7.253666000 | 0.005944000 | 29.351004000 | XXXX 1 | xx | H  | 0.000 |
| H86  | 2.717425000 | 6.966353000 | 27.832215000 | XXXX 1 | xx | H  | 0.000 |
| H87  | 4.821717000 | 5.570828000 | 26.297796000 | XXXX 1 | xx | H  | 0.000 |
| H88  | 2.717162000 | 1.396211000 | 27.832713000 | XXXX 1 | xx | H  | 0.000 |
| H89  | 5.127101000 | 4.184105000 | 30.838566000 | XXXX 1 | xx | H  | 0.000 |
| H90  | 5.127253000 | 1.400226000 | 30.841092000 | XXXX 1 | xx | H  | 0.000 |
| H91  | 2.775515000 | 4.183993000 | 30.874512000 | XXXX 1 | xx | H  | 0.000 |
| H92  | 2.776118000 | 1.399884000 | 30.876023000 | XXXX 1 | xx | H  | 0.000 |
| H93  | 7.256923000 | 5.574752000 | 29.347557000 | XXXX 1 | xx | H  | 0.000 |
| end  |             |             |              |        |    |    |       |

### $H_{r_i}/Pd(110) (r_i = 1)$

| PBC  | 7.8743      | 8.3520      | 45.3120      | 90.0000 | 90.0000 | 90.0000 (P1) |       |  |
|------|-------------|-------------|--------------|---------|---------|--------------|-------|--|
| Pd1  | 5.905756000 | 1.392028000 | 23.351992000 | XXXX 1  | xx      | Pd           | 0.000 |  |
| Pd2  | 5.905756000 | 4.176000000 | 23.351992000 | XXXX 1  | xx      | Pd           | 0.000 |  |
| Pd3  | 5.905756000 | 6.959972000 | 23.351992000 | XXXX 1  | xx      | Pd           | 0.000 |  |
| Pd4  | 1.968585000 | 1.392028000 | 23.351992000 | XXXX 1  | xx      | Pd           | 0.000 |  |
| Pd5  | 1.968585000 | 4.176000000 | 23.351992000 | XXXX 1  | xx      | Pd           | 0.000 |  |
| Pd6  | 1.968585000 | 6.959972000 | 23.351992000 | XXXX 1  | xx      | Pd           | 0.000 |  |
| Pd7  | 0.000000000 | 2.783972000 | 24.743977000 | XXXX 1  | xx      | Pd           | 0.000 |  |
| Pd8  | 0.000000000 | 5.568028000 | 24.743977000 | XXXX 1  | xx      | Pd           | 0.000 |  |
| Pd9  | 0.000000000 | 0.000000000 | 24.743977000 | XXXX 1  | xx      | Pd           | 0.000 |  |
| Pd10 | 0.000000000 | 0.000000000 | 21.960008000 | XXXX 1  | xx      | Pd           | 0.000 |  |
| Pd11 | 0.000000000 | 2.783972000 | 21.960008000 | XXXX 1  | xx      | Pd           | 0.000 |  |
| Pd12 | 0.000000000 | 5.568028000 | 21.960008000 | XXXX 1  | xx      | Pd           | 0.000 |  |
| Pd13 | 1.968585000 | 1.392028000 | 20.568023000 | XXXX 1  | xx      | Pd           | 0.000 |  |
| Pd14 | 1.968585000 | 4.176000000 | 20.568023000 | XXXX 1  | xx      | Pd           | 0.000 |  |
| Pd15 | 1.968585000 | 6.959972000 | 20.568023000 | XXXX 1  | xx      | Pd           | 0.000 |  |
| Pd16 | 3.937171000 | 0.000000000 | 21.960008000 | XXXX 1  | xx      | Pd           | 0.000 |  |
| Pd17 | 3.937171000 | 2.783972000 | 21.960008000 | XXXX 1  | xx      | Pd           | 0.000 |  |
| Pd18 | 3.937171000 | 5.568028000 | 21.960008000 | XXXX 1  | xx      | Pd           | 0.000 |  |
| Pd19 | 5.905756000 | 1.392028000 | 20.568023000 | XXXX 1  | xx      | Pd           | 0.000 |  |
| Pd20 | 5.905756000 | 4.176000000 | 20.568023000 | XXXX 1  | xx      | Pd           | 0.000 |  |
| Pd21 | 5.905756000 | 6.959972000 | 20.568023000 | XXXX 1  | xx      | Pd           | 0.000 |  |
| Pd22 | 3.937171000 | 0.000000000 | 19.176038000 | XXXX 1  | xx      | Pd           | 0.000 |  |
| Pd23 | 3.937171000 | 2.783972000 | 19.176038000 | XXXX 1  | xx      | Pd           | 0.000 |  |
| Pd24 | 3.937171000 | 5.568028000 | 19.176038000 | XXXX 1  | xx      | Pd           | 0.000 |  |
| Pd25 | 0.030552000 | 0.000585000 | 19.175585000 | XXXX 1  | xx      | Pd           | 0.000 |  |

|      |             |             |              |        |    |    |       |
|------|-------------|-------------|--------------|--------|----|----|-------|
| Pd26 | 0.030552000 | 2.784640000 | 19.175585000 | XXXX 1 | xx | Pd | 0.000 |
| Pd27 | 0.030474000 | 5.568612000 | 19.175585000 | XXXX 1 | xx | Pd | 0.000 |
| Pd28 | 1.984491000 | 1.391777000 | 17.725601000 | XXXX 1 | xx | Pd | 0.000 |
| Pd29 | 1.984413000 | 4.175749000 | 17.725148000 | XXXX 1 | xx | Pd | 0.000 |
| Pd30 | 1.984334000 | 6.959638000 | 17.725148000 | XXXX 1 | xx | Pd | 0.000 |
| Pd31 | 5.921662000 | 1.392362000 | 17.831631000 | XXXX 1 | xx | Pd | 0.000 |
| Pd32 | 5.921426000 | 4.176251000 | 17.831178000 | XXXX 1 | xx | Pd | 0.000 |
| Pd33 | 5.921505000 | 6.960139000 | 17.831178000 | XXXX 1 | xx | Pd | 0.000 |
| Pd34 | 0.040002000 | 8.351749000 | 16.401585000 | XXXX 1 | xx | Pd | 0.000 |
| Pd35 | 0.040159000 | 2.783638000 | 16.401585000 | XXXX 1 | xx | Pd | 0.000 |
| Pd36 | 0.039844000 | 5.567527000 | 16.401132000 | XXXX 1 | xx | Pd | 0.000 |
| Pd37 | 3.928115000 | 2.783388000 | 16.402491000 | XXXX 1 | xx | Pd | 0.000 |
| Pd38 | 3.928036000 | 5.567193000 | 16.402038000 | XXXX 1 | xx | Pd | 0.000 |
| Pd39 | 3.928351000 | 8.351499000 | 16.402944000 | XXXX 1 | xx | Pd | 0.000 |
| Pd40 | 5.920323000 | 1.391026000 | 15.136474000 | XXXX 1 | xx | Pd | 0.000 |
| Pd41 | 5.920087000 | 4.174831000 | 15.136020000 | XXXX 1 | xx | Pd | 0.000 |
| Pd42 | 5.920008000 | 6.958803000 | 15.136020000 | XXXX 1 | xx | Pd | 0.000 |
| H43  | 4.784448000 | 2.783509000 | 14.813653000 | XXXX 1 | xx | H  | 0.000 |
| H44  | 4.784327000 | 5.567528000 | 14.813308000 | XXXX 1 | xx | H  | 0.000 |
| H45  | 4.784472000 | 8.351801000 | 14.814017000 | XXXX 1 | xx | H  | 0.000 |
| H46  | 1.083094000 | 1.397647000 | 16.146732000 | XXXX 1 | xx | H  | 0.000 |
| H47  | 1.082973000 | 4.181726000 | 16.146330000 | XXXX 1 | xx | H  | 0.000 |
| H48  | 1.082856000 | 6.965576000 | 16.146515000 | XXXX 1 | xx | H  | 0.000 |
| H49  | 2.883673000 | 1.392031000 | 16.147297000 | XXXX 1 | xx | H  | 0.000 |
| H50  | 2.883493000 | 4.175967000 | 16.146767000 | XXXX 1 | xx | H  | 0.000 |
| H51  | 2.883790000 | 6.960290000 | 16.147130000 | XXXX 1 | xx | H  | 0.000 |
| H52  | 7.056651000 | 8.350437000 | 14.813892000 | XXXX 1 | xx | H  | 0.000 |
| H53  | 7.056827000 | 2.782554000 | 14.813815000 | XXXX 1 | xx | H  | 0.000 |
| H54  | 7.056528000 | 5.566429000 | 14.813346000 | XXXX 1 | xx | H  | 0.000 |
| Pd55 | 4.020880000 | 8.351076000 | 24.905627000 | XXXX 1 | xx | Pd | 0.000 |
| Pd56 | 4.020694000 | 2.783435000 | 24.905387000 | XXXX 1 | xx | Pd | 0.000 |
| Pd57 | 4.020749000 | 5.567455000 | 24.905493000 | XXXX 1 | xx | Pd | 0.000 |
| Pd58 | 3.885331000 | 2.783236000 | 31.071378000 | XXXX 1 | xx | Pd | 0.000 |
| Pd59 | 3.948056000 | 8.351257000 | 28.221673000 | XXXX 1 | xx | Pd | 0.000 |
| Pd60 | 1.735095000 | 6.959361000 | 29.739393000 | XXXX 1 | xx | Pd | 0.000 |
| Pd61 | 6.003610000 | 1.391676000 | 29.706757000 | XXXX 1 | xx | Pd | 0.000 |
| Pd62 | 1.735349000 | 1.391300000 | 29.738120000 | XXXX 1 | xx | Pd | 0.000 |
| Pd63 | 3.885199000 | 8.350747000 | 31.071983000 | XXXX 1 | xx | Pd | 0.000 |
| Pd64 | 6.003597000 | 4.175296000 | 29.706247000 | XXXX 1 | xx | Pd | 0.000 |
| Pd65 | 1.735454000 | 4.175185000 | 29.737880000 | XXXX 1 | xx | Pd | 0.000 |
| Pd66 | 3.885224000 | 5.566956000 | 31.071638000 | XXXX 1 | xx | Pd | 0.000 |
| Pd67 | 7.871717000 | 5.567328000 | 28.115365000 | XXXX 1 | xx | Pd | 0.000 |
| Pd68 | 7.871539000 | 8.351544000 | 28.115910000 | XXXX 1 | xx | Pd | 0.000 |
| Pd69 | 7.871948000 | 2.783376000 | 28.114914000 | XXXX 1 | xx | Pd | 0.000 |
| Pd70 | 1.957303000 | 1.391172000 | 26.523874000 | XXXX 1 | xx | Pd | 0.000 |
| Pd71 | 1.957416000 | 4.175974000 | 26.523735000 | XXXX 1 | xx | Pd | 0.000 |
| Pd72 | 1.956908000 | 6.960003000 | 26.524344000 | XXXX 1 | xx | Pd | 0.000 |
| Pd73 | 3.948717000 | 2.783164000 | 28.220901000 | XXXX 1 | xx | Pd | 0.000 |
| Pd74 | 3.948190000 | 5.567453000 | 28.221357000 | XXXX 1 | xx | Pd | 0.000 |
| Pd75 | 6.003158000 | 6.959287000 | 29.706849000 | XXXX 1 | xx | Pd | 0.000 |
| Pd76 | 5.962440000 | 1.391156000 | 26.624856000 | XXXX 1 | xx | Pd | 0.000 |
| Pd77 | 5.962550000 | 4.175446000 | 26.624618000 | XXXX 1 | xx | Pd | 0.000 |
| Pd78 | 5.962502000 | 6.959487000 | 26.624939000 | XXXX 1 | xx | Pd | 0.000 |
| H79  | 5.048671000 | 6.958793000 | 31.265341000 | XXXX 1 | xx | H  | 0.000 |
| H80  | 4.738683000 | 5.567414000 | 26.579677000 | XXXX 1 | xx | H  | 0.000 |
| H81  | 5.048837000 | 1.391052000 | 31.265173000 | XXXX 1 | xx | H  | 0.000 |
| H82  | 7.165949000 | 8.351349000 | 29.806732000 | XXXX 1 | xx | H  | 0.000 |
| H83  | 2.724902000 | 4.174982000 | 28.234120000 | XXXX 1 | xx | H  | 0.000 |
| H84  | 4.738494000 | 8.351134000 | 26.580100000 | XXXX 1 | xx | H  | 0.000 |
| H85  | 5.048851000 | 4.174870000 | 31.264394000 | XXXX 1 | xx | H  | 0.000 |
| H86  | 2.714568000 | 4.174805000 | 31.260064000 | XXXX 1 | xx | H  | 0.000 |
| H87  | 2.724601000 | 1.391366000 | 28.234236000 | XXXX 1 | xx | H  | 0.000 |
| H88  | 2.714635000 | 1.390986000 | 31.260341000 | XXXX 1 | xx | H  | 0.000 |
| H89  | 4.739093000 | 2.783367000 | 26.579241000 | XXXX 1 | xx | H  | 0.000 |
| H90  | 2.723944000 | 6.959110000 | 28.235444000 | XXXX 1 | xx | H  | 0.000 |
| H91  | 2.714766000 | 6.958923000 | 31.261187000 | XXXX 1 | xx | H  | 0.000 |
| H92  | 6.671796000 | 4.176639000 | 24.972607000 | XXXX 1 | xx | H  | 0.000 |
| H93  | 6.671316000 | 1.392655000 | 24.972676000 | XXXX 1 | xx | H  | 0.000 |
| H94  | 6.671186000 | 6.961309000 | 24.972665000 | XXXX 1 | xx | H  | 0.000 |

|      |             |             |              |        |    |   |       |
|------|-------------|-------------|--------------|--------|----|---|-------|
| H95  | 7.166269000 | 5.567630000 | 29.805507000 | XXXX 1 | xx | H | 0.000 |
| H96  | 7.167702000 | 2.783480000 | 29.804541000 | XXXX 1 | xx | H | 0.000 |
| H97  | 2.828483000 | 4.175130000 | 24.902337000 | XXXX 1 | xx | H | 0.000 |
| H98  | 0.736509000 | 5.568065000 | 26.413481000 | XXXX 1 | xx | H | 0.000 |
| H99  | 2.827839000 | 6.958962000 | 24.902870000 | XXXX 1 | xx | H | 0.000 |
| H100 | 0.738427000 | 2.783680000 | 26.412342000 | XXXX 1 | xx | H | 0.000 |
| H101 | 2.828573000 | 1.390480000 | 24.902182000 | XXXX 1 | xx | H | 0.000 |
| H102 | 0.735045000 | 0.000056000 | 26.414758000 | XXXX 1 | xx | H | 0.000 |
| end  |             |             |              |        |    |   |       |

## 4. XYZ coordinates for the configurations in Fig. 2

$H_{r_i}$ -N/Pd(110) ( $r_i = 0.25$ )

| PBC  | 7.8743      | 8.3520      | 45.3120      | 90.0000 | 90.0000 | 90.0000 (P1) |    |       |
|------|-------------|-------------|--------------|---------|---------|--------------|----|-------|
| Pd1  | 5.905756000 | 1.392028000 | 23.351992000 | XXXX    | 1       | xx           | Pd | 0.000 |
| Pd2  | 5.905756000 | 4.176000000 | 23.351992000 | XXXX    | 1       | xx           | Pd | 0.000 |
| Pd3  | 5.905756000 | 6.959972000 | 23.351992000 | XXXX    | 1       | xx           | Pd | 0.000 |
| Pd4  | 1.968585000 | 1.392028000 | 23.351992000 | XXXX    | 1       | xx           | Pd | 0.000 |
| Pd5  | 1.968585000 | 4.176000000 | 23.351992000 | XXXX    | 1       | xx           | Pd | 0.000 |
| Pd6  | 1.968585000 | 6.959972000 | 23.351992000 | XXXX    | 1       | xx           | Pd | 0.000 |
| Pd7  | 0.000000000 | 2.783972000 | 24.743977000 | XXXX    | 1       | xx           | Pd | 0.000 |
| Pd8  | 0.000000000 | 5.568028000 | 24.743977000 | XXXX    | 1       | xx           | Pd | 0.000 |
| Pd9  | 0.000000000 | 0.000000000 | 24.743977000 | XXXX    | 1       | xx           | Pd | 0.000 |
| Pd10 | 0.000000000 | 0.000000000 | 21.960008000 | XXXX    | 1       | xx           | Pd | 0.000 |
| Pd11 | 0.000000000 | 2.783972000 | 21.960008000 | XXXX    | 1       | xx           | Pd | 0.000 |
| Pd12 | 0.000000000 | 5.568028000 | 21.960008000 | XXXX    | 1       | xx           | Pd | 0.000 |
| Pd13 | 1.968585000 | 1.392028000 | 20.568023000 | XXXX    | 1       | xx           | Pd | 0.000 |
| Pd14 | 1.968585000 | 4.176000000 | 20.568023000 | XXXX    | 1       | xx           | Pd | 0.000 |
| Pd15 | 1.968585000 | 6.959972000 | 20.568023000 | XXXX    | 1       | xx           | Pd | 0.000 |
| Pd16 | 3.937171000 | 0.000000000 | 21.960008000 | XXXX    | 1       | xx           | Pd | 0.000 |
| Pd17 | 3.937171000 | 2.783972000 | 21.960008000 | XXXX    | 1       | xx           | Pd | 0.000 |
| Pd18 | 3.937171000 | 5.568028000 | 21.960008000 | XXXX    | 1       | xx           | Pd | 0.000 |
| Pd19 | 5.905756000 | 1.392028000 | 20.568023000 | XXXX    | 1       | xx           | Pd | 0.000 |
| Pd20 | 5.905756000 | 4.176000000 | 20.568023000 | XXXX    | 1       | xx           | Pd | 0.000 |
| Pd21 | 5.905756000 | 6.959972000 | 20.568023000 | XXXX    | 1       | xx           | Pd | 0.000 |
| Pd22 | 3.937171000 | 0.000000000 | 19.176038000 | XXXX    | 1       | xx           | Pd | 0.000 |
| Pd23 | 3.937171000 | 2.783972000 | 19.176038000 | XXXX    | 1       | xx           | Pd | 0.000 |
| Pd24 | 3.937171000 | 5.568028000 | 19.176038000 | XXXX    | 1       | xx           | Pd | 0.000 |
| Pd25 | 0.030552000 | 0.000585000 | 19.175585000 | XXXX    | 1       | xx           | Pd | 0.000 |
| Pd26 | 0.030552000 | 2.784640000 | 19.175585000 | XXXX    | 1       | xx           | Pd | 0.000 |
| Pd27 | 0.030474000 | 5.568612000 | 19.175585000 | XXXX    | 1       | xx           | Pd | 0.000 |
| Pd28 | 1.984491000 | 1.391777000 | 17.725601000 | XXXX    | 1       | xx           | Pd | 0.000 |
| Pd29 | 1.984413000 | 4.175749000 | 17.725148000 | XXXX    | 1       | xx           | Pd | 0.000 |
| Pd30 | 1.984334000 | 6.959638000 | 17.725148000 | XXXX    | 1       | xx           | Pd | 0.000 |
| Pd31 | 5.921662000 | 1.392362000 | 17.831631000 | XXXX    | 1       | xx           | Pd | 0.000 |
| Pd32 | 5.921426000 | 4.176251000 | 17.831178000 | XXXX    | 1       | xx           | Pd | 0.000 |
| Pd33 | 5.921505000 | 6.960139000 | 17.831178000 | XXXX    | 1       | xx           | Pd | 0.000 |
| Pd34 | 0.040002000 | 8.351749000 | 16.401585000 | XXXX    | 1       | xx           | Pd | 0.000 |
| Pd35 | 0.040159000 | 2.783638000 | 16.401585000 | XXXX    | 1       | xx           | Pd | 0.000 |
| Pd36 | 0.039844000 | 5.567527000 | 16.401132000 | XXXX    | 1       | xx           | Pd | 0.000 |
| Pd37 | 3.928115000 | 2.783388000 | 16.402491000 | XXXX    | 1       | xx           | Pd | 0.000 |
| Pd38 | 3.928036000 | 5.567193000 | 16.402038000 | XXXX    | 1       | xx           | Pd | 0.000 |
| Pd39 | 3.928351000 | 8.351499000 | 16.402944000 | XXXX    | 1       | xx           | Pd | 0.000 |
| Pd40 | 5.920323000 | 1.391026000 | 15.136474000 | XXXX    | 1       | xx           | Pd | 0.000 |
| Pd41 | 5.920087000 | 4.174831000 | 15.136020000 | XXXX    | 1       | xx           | Pd | 0.000 |
| Pd42 | 5.920008000 | 6.958803000 | 15.136020000 | XXXX    | 1       | xx           | Pd | 0.000 |
| H43  | 4.784448000 | 2.783509000 | 14.813653000 | XXXX    | 1       | xx           | H  | 0.000 |
| H44  | 4.784327000 | 5.567528000 | 14.813308000 | XXXX    | 1       | xx           | H  | 0.000 |
| H45  | 4.784472000 | 8.351801000 | 14.814017000 | XXXX    | 1       | xx           | H  | 0.000 |
| H46  | 1.083094000 | 1.397647000 | 16.146732000 | XXXX    | 1       | xx           | H  | 0.000 |
| H47  | 1.082973000 | 4.181726000 | 16.146330000 | XXXX    | 1       | xx           | H  | 0.000 |
| H48  | 1.082856000 | 6.965576000 | 16.146515000 | XXXX    | 1       | xx           | H  | 0.000 |
| H49  | 2.883673000 | 1.392031000 | 16.147297000 | XXXX    | 1       | xx           | H  | 0.000 |
| H50  | 2.883493000 | 4.175967000 | 16.146767000 | XXXX    | 1       | xx           | H  | 0.000 |
| H51  | 2.883790000 | 6.960290000 | 16.147130000 | XXXX    | 1       | xx           | H  | 0.000 |
| H52  | 7.056651000 | 8.350437000 | 14.813892000 | XXXX    | 1       | xx           | H  | 0.000 |
| H53  | 7.056827000 | 2.782554000 | 14.813815000 | XXXX    | 1       | xx           | H  | 0.000 |
| H54  | 7.056528000 | 5.566429000 | 14.813346000 | XXXX    | 1       | xx           | H  | 0.000 |
| Pd55 | 3.937731000 | 8.350654000 | 24.800340000 | XXXX    | 1       | xx           | Pd | 0.000 |
| Pd56 | 3.940191000 | 2.783815000 | 24.796769000 | XXXX    | 1       | xx           | Pd | 0.000 |
| Pd57 | 3.937738000 | 5.570135000 | 24.799781000 | XXXX    | 1       | xx           | Pd | 0.000 |
| Pd58 | 2.052149000 | 1.413960000 | 29.092799000 | XXXX    | 1       | xx           | Pd | 0.000 |
| Pd59 | 2.051781000 | 4.149712000 | 29.092568000 | XXXX    | 1       | xx           | Pd | 0.000 |
| Pd60 | 1.997360000 | 6.957223000 | 29.159257000 | XXXX    | 1       | xx           | Pd | 0.000 |
| Pd61 | 0.030240000 | 0.005851000 | 30.615332000 | XXXX    | 1       | xx           | Pd | 0.000 |
| Pd62 | 0.022053000 | 2.778909000 | 30.535942000 | XXXX    | 1       | xx           | Pd | 0.000 |



|      |             |             |              |        |    |    |       |
|------|-------------|-------------|--------------|--------|----|----|-------|
| Pd63 | 0.026687000 | 5.553837000 | 30.614038000 | XXXX 1 | xx | Pd | 0.000 |
| Pd64 | 5.848954000 | 1.413581000 | 29.111733000 | XXXX 1 | xx | Pd | 0.000 |
| Pd65 | 5.847421000 | 4.149696000 | 29.111469000 | XXXX 1 | xx | Pd | 0.000 |
| Pd66 | 5.912919000 | 6.958398000 | 29.195459000 | XXXX 1 | xx | Pd | 0.000 |
| Pd67 | 7.875405000 | 8.357200000 | 27.686487000 | XXXX 1 | xx | Pd | 0.000 |
| Pd68 | 7.883763000 | 2.785382000 | 27.656454000 | XXXX 1 | xx | Pd | 0.000 |
| Pd69 | 7.874929000 | 5.562415000 | 27.685551000 | XXXX 1 | xx | Pd | 0.000 |
| Pd70 | 1.949969000 | 1.394584000 | 26.215836000 | XXXX 1 | xx | Pd | 0.000 |
| Pd71 | 1.949814000 | 4.173779000 | 26.215975000 | XXXX 1 | xx | Pd | 0.000 |
| Pd72 | 1.921416000 | 6.960336000 | 26.200408000 | XXXX 1 | xx | Pd | 0.000 |
| Pd73 | 3.955547000 | 0.023113000 | 27.619657000 | XXXX 1 | xx | Pd | 0.000 |
| Pd74 | 3.953996000 | 2.783165000 | 27.627066000 | XXXX 1 | xx | Pd | 0.000 |
| Pd75 | 3.955841000 | 5.543636000 | 27.619938000 | XXXX 1 | xx | Pd | 0.000 |
| Pd76 | 5.938423000 | 1.393127000 | 26.210687000 | XXXX 1 | xx | Pd | 0.000 |
| Pd77 | 5.938311000 | 4.175216000 | 26.210419000 | XXXX 1 | xx | Pd | 0.000 |
| Pd78 | 5.959992000 | 6.960257000 | 26.195051000 | XXXX 1 | xx | Pd | 0.000 |
| N79  | 3.956384000 | 6.959563000 | 28.988223000 | XXXX 1 | xx | N  | 0.000 |
| H80  | 1.240323000 | 1.416690000 | 30.692787000 | XXXX 1 | xx | H  | 0.000 |
| H81  | 1.236746000 | 4.142864000 | 30.691817000 | XXXX 1 | xx | H  | 0.000 |
| H82  | 1.169344000 | 6.962767000 | 30.840379000 | XXXX 1 | xx | H  | 0.000 |
| H83  | 6.689972000 | 1.404438000 | 30.694509000 | XXXX 1 | xx | H  | 0.000 |
| H84  | 6.682951000 | 4.146220000 | 30.695422000 | XXXX 1 | xx | H  | 0.000 |
| H85  | 6.766238000 | 6.955963000 | 30.845460000 | XXXX 1 | xx | H  | 0.000 |
| end  |             |             |              |        |    |    |       |

**$H_{r_i} - N/Pd(110)$  ( $r_i = 0.375$ )**

| PBC  | 7.8743      | 8.3520      | 45.3120      | 90.0000 | 90.0000 | 90.0000 (P1) |       |  |
|------|-------------|-------------|--------------|---------|---------|--------------|-------|--|
| Pd1  | 5.905756000 | 1.392028000 | 23.351992000 | XXXX 1  | xx      | Pd           | 0.000 |  |
| Pd2  | 5.905756000 | 4.176000000 | 23.351992000 | XXXX 1  | xx      | Pd           | 0.000 |  |
| Pd3  | 5.905756000 | 6.959972000 | 23.351992000 | XXXX 1  | xx      | Pd           | 0.000 |  |
| Pd4  | 1.968585000 | 1.392028000 | 23.351992000 | XXXX 1  | xx      | Pd           | 0.000 |  |
| Pd5  | 1.968585000 | 4.176000000 | 23.351992000 | XXXX 1  | xx      | Pd           | 0.000 |  |
| Pd6  | 1.968585000 | 6.959972000 | 23.351992000 | XXXX 1  | xx      | Pd           | 0.000 |  |
| Pd7  | 0.000000000 | 2.783972000 | 24.743977000 | XXXX 1  | xx      | Pd           | 0.000 |  |
| Pd8  | 0.000000000 | 5.568028000 | 24.743977000 | XXXX 1  | xx      | Pd           | 0.000 |  |
| Pd9  | 0.000000000 | 0.000000000 | 24.743977000 | XXXX 1  | xx      | Pd           | 0.000 |  |
| Pd10 | 0.000000000 | 0.000000000 | 21.960008000 | XXXX 1  | xx      | Pd           | 0.000 |  |
| Pd11 | 0.000000000 | 2.783972000 | 21.960008000 | XXXX 1  | xx      | Pd           | 0.000 |  |
| Pd12 | 0.000000000 | 5.568028000 | 21.960008000 | XXXX 1  | xx      | Pd           | 0.000 |  |
| Pd13 | 1.968585000 | 1.392028000 | 20.568023000 | XXXX 1  | xx      | Pd           | 0.000 |  |
| Pd14 | 1.968585000 | 4.176000000 | 20.568023000 | XXXX 1  | xx      | Pd           | 0.000 |  |
| Pd15 | 1.968585000 | 6.959972000 | 20.568023000 | XXXX 1  | xx      | Pd           | 0.000 |  |
| Pd16 | 3.937171000 | 0.000000000 | 21.960008000 | XXXX 1  | xx      | Pd           | 0.000 |  |
| Pd17 | 3.937171000 | 2.783972000 | 21.960008000 | XXXX 1  | xx      | Pd           | 0.000 |  |
| Pd18 | 3.937171000 | 5.568028000 | 21.960008000 | XXXX 1  | xx      | Pd           | 0.000 |  |
| Pd19 | 5.905756000 | 1.392028000 | 20.568023000 | XXXX 1  | xx      | Pd           | 0.000 |  |
| Pd20 | 5.905756000 | 4.176000000 | 20.568023000 | XXXX 1  | xx      | Pd           | 0.000 |  |
| Pd21 | 5.905756000 | 6.959972000 | 20.568023000 | XXXX 1  | xx      | Pd           | 0.000 |  |
| Pd22 | 3.937171000 | 0.000000000 | 19.176038000 | XXXX 1  | xx      | Pd           | 0.000 |  |
| Pd23 | 3.937171000 | 2.783972000 | 19.176038000 | XXXX 1  | xx      | Pd           | 0.000 |  |
| Pd24 | 3.937171000 | 5.568028000 | 19.176038000 | XXXX 1  | xx      | Pd           | 0.000 |  |
| Pd25 | 0.030552000 | 0.000585000 | 19.175585000 | XXXX 1  | xx      | Pd           | 0.000 |  |
| Pd26 | 0.030552000 | 2.784640000 | 19.175585000 | XXXX 1  | xx      | Pd           | 0.000 |  |
| Pd27 | 0.030474000 | 5.568612000 | 19.175585000 | XXXX 1  | xx      | Pd           | 0.000 |  |
| Pd28 | 1.984491000 | 1.391777000 | 17.725601000 | XXXX 1  | xx      | Pd           | 0.000 |  |
| Pd29 | 1.984413000 | 4.175749000 | 17.725148000 | XXXX 1  | xx      | Pd           | 0.000 |  |
| Pd30 | 1.984334000 | 6.959638000 | 17.725148000 | XXXX 1  | xx      | Pd           | 0.000 |  |
| Pd31 | 5.921662000 | 1.392362000 | 17.831631000 | XXXX 1  | xx      | Pd           | 0.000 |  |
| Pd32 | 5.921426000 | 4.176251000 | 17.831178000 | XXXX 1  | xx      | Pd           | 0.000 |  |
| Pd33 | 5.921505000 | 6.960139000 | 17.831178000 | XXXX 1  | xx      | Pd           | 0.000 |  |
| Pd34 | 0.040002000 | 8.351749000 | 16.401585000 | XXXX 1  | xx      | Pd           | 0.000 |  |
| Pd35 | 0.040159000 | 2.783638000 | 16.401585000 | XXXX 1  | xx      | Pd           | 0.000 |  |
| Pd36 | 0.039844000 | 5.567527000 | 16.401132000 | XXXX 1  | xx      | Pd           | 0.000 |  |
| Pd37 | 3.928115000 | 2.783388000 | 16.402491000 | XXXX 1  | xx      | Pd           | 0.000 |  |
| Pd38 | 3.928036000 | 5.567193000 | 16.402038000 | XXXX 1  | xx      | Pd           | 0.000 |  |
| Pd39 | 3.928351000 | 8.351499000 | 16.402944000 | XXXX 1  | xx      | Pd           | 0.000 |  |
| Pd40 | 5.920323000 | 1.391026000 | 15.136474000 | XXXX 1  | xx      | Pd           | 0.000 |  |
| Pd41 | 5.920087000 | 4.174831000 | 15.136020000 | XXXX 1  | xx      | Pd           | 0.000 |  |
| Pd42 | 5.920008000 | 6.958803000 | 15.136020000 | XXXX 1  | xx      | Pd           | 0.000 |  |

|      |              |             |              |      |   |    |    |       |
|------|--------------|-------------|--------------|------|---|----|----|-------|
| H43  | 4.784448000  | 2.783509000 | 14.813653000 | XXXX | 1 | xx | H  | 0.000 |
| H44  | 4.784327000  | 5.567528000 | 14.813308000 | XXXX | 1 | xx | H  | 0.000 |
| H45  | 4.784472000  | 8.351801000 | 14.814017000 | XXXX | 1 | xx | H  | 0.000 |
| H46  | 1.083094000  | 1.397647000 | 16.146732000 | XXXX | 1 | xx | H  | 0.000 |
| H47  | 1.082973000  | 4.181726000 | 16.146330000 | XXXX | 1 | xx | H  | 0.000 |
| H48  | 1.082856000  | 6.965576000 | 16.146515000 | XXXX | 1 | xx | H  | 0.000 |
| H49  | 2.883673000  | 1.392031000 | 16.147297000 | XXXX | 1 | xx | H  | 0.000 |
| H50  | 2.883493000  | 4.175967000 | 16.146767000 | XXXX | 1 | xx | H  | 0.000 |
| H51  | 2.883790000  | 6.960290000 | 16.147130000 | XXXX | 1 | xx | H  | 0.000 |
| H52  | 7.056651000  | 8.350437000 | 14.813892000 | XXXX | 1 | xx | H  | 0.000 |
| H53  | 7.056827000  | 2.782554000 | 14.813815000 | XXXX | 1 | xx | H  | 0.000 |
| H54  | 7.056528000  | 5.566429000 | 14.813346000 | XXXX | 1 | xx | H  | 0.000 |
| Pd55 | 3.937500000  | 0.000525000 | 24.753379000 | XXXX | 1 | xx | Pd | 0.000 |
| Pd56 | 3.947483000  | 2.781006000 | 24.779725000 | XXXX | 1 | xx | Pd | 0.000 |
| Pd57 | 3.946744000  | 5.571453000 | 24.777989000 | XXXX | 1 | xx | Pd | 0.000 |
| Pd58 | 2.257662000  | 1.381228000 | 29.235998000 | XXXX | 1 | xx | Pd | 0.000 |
| Pd59 | 2.199957000  | 4.182381000 | 29.203876000 | XXXX | 1 | xx | Pd | 0.000 |
| Pd60 | 2.269017000  | 6.986598000 | 29.243275000 | XXXX | 1 | xx | Pd | 0.000 |
| Pd61 | 7.892933000  | 0.005741000 | 30.493332000 | XXXX | 1 | xx | Pd | 0.000 |
| Pd62 | 0.024583000  | 2.780734000 | 30.512010000 | XXXX | 1 | xx | Pd | 0.000 |
| Pd63 | 7.905482000  | 5.584422000 | 30.504272000 | XXXX | 1 | xx | Pd | 0.000 |
| Pd64 | 5.601133000  | 1.365678000 | 29.298564000 | XXXX | 1 | xx | Pd | 0.000 |
| Pd65 | 5.850655000  | 4.181058000 | 29.082610000 | XXXX | 1 | xx | Pd | 0.000 |
| Pd66 | 5.639262000  | 7.007826000 | 29.245701000 | XXXX | 1 | xx | Pd | 0.000 |
| Pd67 | 0.005183000  | 8.353922000 | 27.709711000 | XXXX | 1 | xx | Pd | 0.000 |
| Pd68 | -0.013029000 | 2.721010000 | 27.725426000 | XXXX | 1 | xx | Pd | 0.000 |
| Pd69 | 7.866251000  | 5.631912000 | 27.718391000 | XXXX | 1 | xx | Pd | 0.000 |
| Pd70 | 1.922415000  | 1.392269000 | 26.188110000 | XXXX | 1 | xx | Pd | 0.000 |
| Pd71 | 1.940092000  | 4.176521000 | 26.160691000 | XXXX | 1 | xx | Pd | 0.000 |
| Pd72 | 1.924003000  | 6.963617000 | 26.188039000 | XXXX | 1 | xx | Pd | 0.000 |
| Pd73 | 3.943021000  | 0.004902000 | 27.444499000 | XXXX | 1 | xx | Pd | 0.000 |
| Pd74 | 3.932948000  | 2.800838000 | 27.537483000 | XXXX | 1 | xx | Pd | 0.000 |
| Pd75 | 3.930032000  | 5.557280000 | 27.535245000 | XXXX | 1 | xx | Pd | 0.000 |
| Pd76 | 5.960486000  | 1.394940000 | 26.195792000 | XXXX | 1 | xx | Pd | 0.000 |
| Pd77 | 5.962075000  | 4.176859000 | 26.193559000 | XXXX | 1 | xx | Pd | 0.000 |
| Pd78 | 5.959968000  | 6.959455000 | 26.191523000 | XXXX | 1 | xx | Pd | 0.000 |
| N79  | 3.868065000  | 8.369751000 | 29.405343000 | XXXX | 1 | xx | N  | 0.000 |
| H80  | 4.607071000  | 5.477162000 | 29.196275000 | XXXX | 1 | xx | H  | 0.000 |
| H81  | 1.189065000  | 1.400754000 | 30.706360000 | XXXX | 1 | xx | H  | 0.000 |
| H82  | 1.197854000  | 4.180234000 | 30.687300000 | XXXX | 1 | xx | H  | 0.000 |
| H83  | 1.194165000  | 6.964126000 | 30.702941000 | XXXX | 1 | xx | H  | 0.000 |
| H84  | 6.731758000  | 6.959916000 | 30.692466000 | XXXX | 1 | xx | H  | 0.000 |
| H85  | 6.729983000  | 4.185074000 | 30.646752000 | XXXX | 1 | xx | H  | 0.000 |
| H86  | 6.731435000  | 1.400336000 | 30.721556000 | XXXX | 1 | xx | H  | 0.000 |
| H87  | 1.108904000  | 4.172676000 | 27.775150000 | XXXX | 1 | xx | H  | 0.000 |
| H88  | 4.576773000  | 2.916822000 | 29.210746000 | XXXX | 1 | xx | H  | 0.000 |
| end  |              |             |              |      |   |    |    |       |

**$H_{r_i}$ -N/Pd(110) ( $r_i = 0.5$ )**

| PBC  | 7.8743      | 8.3520      | 45.3120      | 90.0000 | 90.0000 | 90.0000 (P1) |    |       |
|------|-------------|-------------|--------------|---------|---------|--------------|----|-------|
| Pd1  | 5.905756000 | 1.392028000 | 23.351992000 | XXXX    | 1       | xx           | Pd | 0.000 |
| Pd2  | 5.905756000 | 4.176000000 | 23.351992000 | XXXX    | 1       | xx           | Pd | 0.000 |
| Pd3  | 5.905756000 | 6.959972000 | 23.351992000 | XXXX    | 1       | xx           | Pd | 0.000 |
| Pd4  | 1.968585000 | 1.392028000 | 23.351992000 | XXXX    | 1       | xx           | Pd | 0.000 |
| Pd5  | 1.968585000 | 4.176000000 | 23.351992000 | XXXX    | 1       | xx           | Pd | 0.000 |
| Pd6  | 1.968585000 | 6.959972000 | 23.351992000 | XXXX    | 1       | xx           | Pd | 0.000 |
| Pd7  | 0.000000000 | 2.783972000 | 24.743977000 | XXXX    | 1       | xx           | Pd | 0.000 |
| Pd8  | 0.000000000 | 5.568028000 | 24.743977000 | XXXX    | 1       | xx           | Pd | 0.000 |
| Pd9  | 0.000000000 | 0.000000000 | 24.743977000 | XXXX    | 1       | xx           | Pd | 0.000 |
| Pd10 | 0.000000000 | 0.000000000 | 21.960008000 | XXXX    | 1       | xx           | Pd | 0.000 |
| Pd11 | 0.000000000 | 2.783972000 | 21.960008000 | XXXX    | 1       | xx           | Pd | 0.000 |
| Pd12 | 0.000000000 | 5.568028000 | 21.960008000 | XXXX    | 1       | xx           | Pd | 0.000 |
| Pd13 | 1.968585000 | 1.392028000 | 20.568023000 | XXXX    | 1       | xx           | Pd | 0.000 |
| Pd14 | 1.968585000 | 4.176000000 | 20.568023000 | XXXX    | 1       | xx           | Pd | 0.000 |
| Pd15 | 1.968585000 | 6.959972000 | 20.568023000 | XXXX    | 1       | xx           | Pd | 0.000 |
| Pd16 | 3.937171000 | 0.000000000 | 21.960008000 | XXXX    | 1       | xx           | Pd | 0.000 |
| Pd17 | 3.937171000 | 2.783972000 | 21.960008000 | XXXX    | 1       | xx           | Pd | 0.000 |
| Pd18 | 3.937171000 | 5.568028000 | 21.960008000 | XXXX    | 1       | xx           | Pd | 0.000 |
| Pd19 | 5.905756000 | 1.392028000 | 20.568023000 | XXXX    | 1       | xx           | Pd | 0.000 |

|      |             |             |              |        |    |    |       |
|------|-------------|-------------|--------------|--------|----|----|-------|
| Pd20 | 5.905756000 | 4.176000000 | 20.568023000 | XXXX 1 | xx | Pd | 0.000 |
| Pd21 | 5.905756000 | 6.959972000 | 20.568023000 | XXXX 1 | xx | Pd | 0.000 |
| Pd22 | 3.937171000 | 0.000000000 | 19.176038000 | XXXX 1 | xx | Pd | 0.000 |
| Pd23 | 3.937171000 | 2.783972000 | 19.176038000 | XXXX 1 | xx | Pd | 0.000 |
| Pd24 | 3.937171000 | 5.568028000 | 19.176038000 | XXXX 1 | xx | Pd | 0.000 |
| Pd25 | 0.030552000 | 0.000585000 | 19.175585000 | XXXX 1 | xx | Pd | 0.000 |
| Pd26 | 0.030552000 | 2.784640000 | 19.175585000 | XXXX 1 | xx | Pd | 0.000 |
| Pd27 | 0.030474000 | 5.568612000 | 19.175585000 | XXXX 1 | xx | Pd | 0.000 |
| Pd28 | 1.984491000 | 1.391777000 | 17.725601000 | XXXX 1 | xx | Pd | 0.000 |
| Pd29 | 1.984413000 | 4.175749000 | 17.725148000 | XXXX 1 | xx | Pd | 0.000 |
| Pd30 | 1.984334000 | 6.959638000 | 17.725148000 | XXXX 1 | xx | Pd | 0.000 |
| Pd31 | 5.921662000 | 1.392362000 | 17.831631000 | XXXX 1 | xx | Pd | 0.000 |
| Pd32 | 5.921426000 | 4.176251000 | 17.831178000 | XXXX 1 | xx | Pd | 0.000 |
| Pd33 | 5.921505000 | 6.960139000 | 17.831178000 | XXXX 1 | xx | Pd | 0.000 |
| Pd34 | 0.040002000 | 8.351749000 | 16.401585000 | XXXX 1 | xx | Pd | 0.000 |
| Pd35 | 0.040159000 | 2.783638000 | 16.401585000 | XXXX 1 | xx | Pd | 0.000 |
| Pd36 | 0.039844000 | 5.567527000 | 16.401132000 | XXXX 1 | xx | Pd | 0.000 |
| Pd37 | 3.928115000 | 2.783388000 | 16.402491000 | XXXX 1 | xx | Pd | 0.000 |
| Pd38 | 3.928036000 | 5.567193000 | 16.402038000 | XXXX 1 | xx | Pd | 0.000 |
| Pd39 | 3.928351000 | 8.351499000 | 16.402944000 | XXXX 1 | xx | Pd | 0.000 |
| Pd40 | 5.920323000 | 1.391026000 | 15.136474000 | XXXX 1 | xx | Pd | 0.000 |
| Pd41 | 5.920087000 | 4.174831000 | 15.136020000 | XXXX 1 | xx | Pd | 0.000 |
| Pd42 | 5.920008000 | 6.958803000 | 15.136020000 | XXXX 1 | xx | Pd | 0.000 |
| H43  | 4.784448000 | 2.783509000 | 14.813653000 | XXXX 1 | xx | H  | 0.000 |
| H44  | 4.784327000 | 5.567528000 | 14.813308000 | XXXX 1 | xx | H  | 0.000 |
| H45  | 4.784472000 | 8.351801000 | 14.814017000 | XXXX 1 | xx | H  | 0.000 |
| H46  | 1.083094000 | 1.397647000 | 16.146732000 | XXXX 1 | xx | H  | 0.000 |
| H47  | 1.082973000 | 4.181726000 | 16.146330000 | XXXX 1 | xx | H  | 0.000 |
| H48  | 1.082856000 | 6.965576000 | 16.146515000 | XXXX 1 | xx | H  | 0.000 |
| H49  | 2.883673000 | 1.392031000 | 16.147297000 | XXXX 1 | xx | H  | 0.000 |
| H50  | 2.883493000 | 4.175967000 | 16.146767000 | XXXX 1 | xx | H  | 0.000 |
| H51  | 2.883790000 | 6.960290000 | 16.147130000 | XXXX 1 | xx | H  | 0.000 |
| H52  | 7.056651000 | 8.350437000 | 14.813892000 | XXXX 1 | xx | H  | 0.000 |
| H53  | 7.056827000 | 2.782554000 | 14.813815000 | XXXX 1 | xx | H  | 0.000 |
| H54  | 7.056528000 | 5.566429000 | 14.813346000 | XXXX 1 | xx | H  | 0.000 |
| Pd55 | 3.921324000 | 8.342170000 | 24.781049000 | XXXX 1 | xx | Pd | 0.000 |
| Pd56 | 3.947635000 | 2.778541000 | 24.828705000 | XXXX 1 | xx | Pd | 0.000 |
| Pd57 | 3.947357000 | 5.550962000 | 24.827730000 | XXXX 1 | xx | Pd | 0.000 |
| Pd58 | 6.039866000 | 4.114250000 | 29.330683000 | XXXX 1 | xx | Pd | 0.000 |
| Pd59 | 1.627347000 | 6.904946000 | 29.538254000 | XXXX 1 | xx | Pd | 0.000 |
| Pd60 | 1.769937000 | 4.112429000 | 29.399971000 | XXXX 1 | xx | Pd | 0.000 |
| Pd61 | 6.235556000 | 1.304060000 | 29.521537000 | XXXX 1 | xx | Pd | 0.000 |
| Pd62 | 3.942869000 | 8.277683000 | 30.832029000 | XXXX 1 | xx | Pd | 0.000 |
| Pd63 | 3.947781000 | 2.701690000 | 30.755280000 | XXXX 1 | xx | Pd | 0.000 |
| Pd64 | 3.944625000 | 5.501603000 | 30.748839000 | XXXX 1 | xx | Pd | 0.000 |
| Pd65 | 1.615924000 | 1.326073000 | 29.552566000 | XXXX 1 | xx | Pd | 0.000 |
| Pd66 | 6.224918000 | 6.923749000 | 29.496866000 | XXXX 1 | xx | Pd | 0.000 |
| Pd67 | 3.963224000 | 8.318912000 | 28.044273000 | XXXX 1 | xx | Pd | 0.000 |
| Pd68 | 0.000249000 | 8.312598000 | 27.584753000 | XXXX 1 | xx | Pd | 0.000 |
| Pd69 | 7.893952000 | 2.760785000 | 27.670137000 | XXXX 1 | xx | Pd | 0.000 |
| Pd70 | 2.000324000 | 1.374207000 | 26.267654000 | XXXX 1 | xx | Pd | 0.000 |
| Pd71 | 1.994553000 | 4.154688000 | 26.253476000 | XXXX 1 | xx | Pd | 0.000 |
| Pd72 | 1.997593000 | 6.935737000 | 26.258962000 | XXXX 1 | xx | Pd | 0.000 |
| Pd73 | 0.018476000 | 5.508192000 | 27.666692000 | XXXX 1 | xx | Pd | 0.000 |
| Pd74 | 4.009431000 | 2.728285000 | 27.914014000 | XXXX 1 | xx | Pd | 0.000 |
| Pd75 | 4.009470000 | 5.551285000 | 27.911371000 | XXXX 1 | xx | Pd | 0.000 |
| Pd76 | 5.908935000 | 1.398322000 | 26.269676000 | XXXX 1 | xx | Pd | 0.000 |
| Pd77 | 5.889403000 | 4.153367000 | 26.284475000 | XXXX 1 | xx | Pd | 0.000 |
| Pd78 | 5.905098000 | 6.909740000 | 26.269298000 | XXXX 1 | xx | Pd | 0.000 |
| H79  | 7.322071000 | 2.830352000 | 29.381559000 | XXXX 1 | xx | H  | 0.000 |
| H80  | 2.782321000 | 1.326800000 | 30.991378000 | XXXX 1 | xx | H  | 0.000 |
| H81  | 5.110837000 | 1.322987000 | 30.993393000 | XXXX 1 | xx | H  | 0.000 |
| H82  | 7.309248000 | 5.367405000 | 29.372911000 | XXXX 1 | xx | H  | 0.000 |
| H83  | 5.128235000 | 4.102101000 | 30.902445000 | XXXX 1 | xx | H  | 0.000 |
| H84  | 2.736872000 | 1.394970000 | 27.928765000 | XXXX 1 | xx | H  | 0.000 |
| H85  | 2.780052000 | 6.873200000 | 30.985113000 | XXXX 1 | xx | H  | 0.000 |
| H86  | 4.716361000 | 8.334486000 | 26.414874000 | XXXX 1 | xx | H  | 0.000 |
| H87  | 2.796341000 | 4.134842000 | 27.901089000 | XXXX 1 | xx | H  | 0.000 |
| H88  | 5.112121000 | 6.874220000 | 30.969249000 | XXXX 1 | xx | H  | 0.000 |

|     |             |             |              |        |    |   |       |
|-----|-------------|-------------|--------------|--------|----|---|-------|
| H89 | 2.749386000 | 6.891686000 | 27.899599000 | XXXX 1 | xx | H | 0.000 |
| H90 | 2.766829000 | 4.098545000 | 30.914980000 | XXXX 1 | xx | H | 0.000 |
| N91 | 7.876463000 | 8.280381000 | 29.556271000 | XXXX 1 | xx | N | 0.000 |

end

$H_{r_i} - N/Pd(110)$  ( $r_i = 1$ )

|      |             |              |              |         |         |              |       |
|------|-------------|--------------|--------------|---------|---------|--------------|-------|
| PBC  | 7.8743      | 8.3520       | 45.3120      | 90.0000 | 90.0000 | 90.0000 (P1) |       |
| Pd1  | 5.905756000 | 1.392028000  | 23.351992000 | XXXX 1  | xx      | Pd           | 0.000 |
| Pd2  | 5.905756000 | 4.176000000  | 23.351992000 | XXXX 1  | xx      | Pd           | 0.000 |
| Pd3  | 5.905756000 | 6.959972000  | 23.351992000 | XXXX 1  | xx      | Pd           | 0.000 |
| Pd4  | 1.968585000 | 1.392028000  | 23.351992000 | XXXX 1  | xx      | Pd           | 0.000 |
| Pd5  | 1.968585000 | 4.176000000  | 23.351992000 | XXXX 1  | xx      | Pd           | 0.000 |
| Pd6  | 1.968585000 | 6.959972000  | 23.351992000 | XXXX 1  | xx      | Pd           | 0.000 |
| Pd7  | 0.000000000 | 2.783972000  | 24.743977000 | XXXX 1  | xx      | Pd           | 0.000 |
| Pd8  | 0.000000000 | 5.568028000  | 24.743977000 | XXXX 1  | xx      | Pd           | 0.000 |
| Pd9  | 0.000000000 | 0.000000000  | 24.743977000 | XXXX 1  | xx      | Pd           | 0.000 |
| Pd10 | 0.000000000 | 0.000000000  | 21.960008000 | XXXX 1  | xx      | Pd           | 0.000 |
| Pd11 | 0.000000000 | 2.783972000  | 21.960008000 | XXXX 1  | xx      | Pd           | 0.000 |
| Pd12 | 0.000000000 | 5.568028000  | 21.960008000 | XXXX 1  | xx      | Pd           | 0.000 |
| Pd13 | 1.968585000 | 1.392028000  | 20.568023000 | XXXX 1  | xx      | Pd           | 0.000 |
| Pd14 | 1.968585000 | 4.176000000  | 20.568023000 | XXXX 1  | xx      | Pd           | 0.000 |
| Pd15 | 1.968585000 | 6.959972000  | 20.568023000 | XXXX 1  | xx      | Pd           | 0.000 |
| Pd16 | 3.937171000 | 0.000000000  | 21.960008000 | XXXX 1  | xx      | Pd           | 0.000 |
| Pd17 | 3.937171000 | 2.783972000  | 21.960008000 | XXXX 1  | xx      | Pd           | 0.000 |
| Pd18 | 3.937171000 | 5.568028000  | 21.960008000 | XXXX 1  | xx      | Pd           | 0.000 |
| Pd19 | 5.905756000 | 1.392028000  | 20.568023000 | XXXX 1  | xx      | Pd           | 0.000 |
| Pd20 | 5.905756000 | 4.176000000  | 20.568023000 | XXXX 1  | xx      | Pd           | 0.000 |
| Pd21 | 5.905756000 | 6.959972000  | 20.568023000 | XXXX 1  | xx      | Pd           | 0.000 |
| Pd22 | 3.937171000 | 0.000000000  | 19.176038000 | XXXX 1  | xx      | Pd           | 0.000 |
| Pd23 | 3.937171000 | 2.783972000  | 19.176038000 | XXXX 1  | xx      | Pd           | 0.000 |
| Pd24 | 3.937171000 | 5.568028000  | 19.176038000 | XXXX 1  | xx      | Pd           | 0.000 |
| Pd25 | 0.030552000 | 0.000585000  | 19.175585000 | XXXX 1  | xx      | Pd           | 0.000 |
| Pd26 | 0.030552000 | 2.784640000  | 19.175585000 | XXXX 1  | xx      | Pd           | 0.000 |
| Pd27 | 0.030474000 | 5.568612000  | 19.175585000 | XXXX 1  | xx      | Pd           | 0.000 |
| Pd28 | 1.984491000 | 1.391777000  | 17.725601000 | XXXX 1  | xx      | Pd           | 0.000 |
| Pd29 | 1.984413000 | 4.175749000  | 17.725148000 | XXXX 1  | xx      | Pd           | 0.000 |
| Pd30 | 1.984334000 | 6.959638000  | 17.725148000 | XXXX 1  | xx      | Pd           | 0.000 |
| Pd31 | 5.921662000 | 1.392362000  | 17.831631000 | XXXX 1  | xx      | Pd           | 0.000 |
| Pd32 | 5.921426000 | 4.176251000  | 17.831178000 | XXXX 1  | xx      | Pd           | 0.000 |
| Pd33 | 5.921505000 | 6.960139000  | 17.831178000 | XXXX 1  | xx      | Pd           | 0.000 |
| Pd34 | 0.040002000 | 8.351749000  | 16.401585000 | XXXX 1  | xx      | Pd           | 0.000 |
| Pd35 | 0.040159000 | 2.783638000  | 16.401585000 | XXXX 1  | xx      | Pd           | 0.000 |
| Pd36 | 0.039844000 | 5.567527000  | 16.401132000 | XXXX 1  | xx      | Pd           | 0.000 |
| Pd37 | 3.928115000 | 2.783388000  | 16.402491000 | XXXX 1  | xx      | Pd           | 0.000 |
| Pd38 | 3.928036000 | 5.567193000  | 16.402038000 | XXXX 1  | xx      | Pd           | 0.000 |
| Pd39 | 3.928351000 | 8.351499000  | 16.402944000 | XXXX 1  | xx      | Pd           | 0.000 |
| Pd40 | 5.920323000 | 1.391026000  | 15.136474000 | XXXX 1  | xx      | Pd           | 0.000 |
| Pd41 | 5.920087000 | 4.174831000  | 15.136020000 | XXXX 1  | xx      | Pd           | 0.000 |
| Pd42 | 5.920008000 | 6.958803000  | 15.136020000 | XXXX 1  | xx      | Pd           | 0.000 |
| H43  | 4.784448000 | 2.783509000  | 14.813653000 | XXXX 1  | xx      | H            | 0.000 |
| H44  | 4.784327000 | 5.567528000  | 14.813308000 | XXXX 1  | xx      | H            | 0.000 |
| H45  | 4.784472000 | 8.351801000  | 14.814017000 | XXXX 1  | xx      | H            | 0.000 |
| H46  | 1.083094000 | 1.397647000  | 16.146732000 | XXXX 1  | xx      | H            | 0.000 |
| H47  | 1.082973000 | 4.181726000  | 16.146330000 | XXXX 1  | xx      | H            | 0.000 |
| H48  | 1.082856000 | 6.965576000  | 16.146515000 | XXXX 1  | xx      | H            | 0.000 |
| H49  | 2.883673000 | 1.392031000  | 16.147297000 | XXXX 1  | xx      | H            | 0.000 |
| H50  | 2.883493000 | 4.175967000  | 16.146767000 | XXXX 1  | xx      | H            | 0.000 |
| H51  | 2.883790000 | 6.960290000  | 16.147130000 | XXXX 1  | xx      | H            | 0.000 |
| H52  | 7.056651000 | 8.350437000  | 14.813892000 | XXXX 1  | xx      | H            | 0.000 |
| H53  | 7.056827000 | 2.782554000  | 14.813815000 | XXXX 1  | xx      | H            | 0.000 |
| H54  | 7.056528000 | 5.566429000  | 14.813346000 | XXXX 1  | xx      | H            | 0.000 |
| Pd55 | 4.003708000 | -0.000195000 | 24.897273000 | XXXX 1  | xx      | Pd           | 0.000 |
| Pd56 | 4.002111000 | 2.785547000  | 24.899743000 | XXXX 1  | xx      | Pd           | 0.000 |
| Pd57 | 3.904268000 | 5.570883000  | 25.064920000 | XXXX 1  | xx      | Pd           | 0.000 |
| Pd58 | 3.871533000 | 2.788583000  | 31.135740000 | XXXX 1  | xx      | Pd           | 0.000 |
| Pd59 | 3.940914000 | 0.016071000  | 28.292017000 | XXXX 1  | xx      | Pd           | 0.000 |
| Pd60 | 1.689564000 | 6.962333000  | 29.747010000 | XXXX 1  | xx      | Pd           | 0.000 |
| Pd61 | 6.167909000 | 1.423212000  | 29.880899000 | XXXX 1  | xx      | Pd           | 0.000 |
| Pd62 | 1.577208000 | 1.400234000  | 29.866717000 | XXXX 1  | xx      | Pd           | 0.000 |

|      |              |              |              |        |    |    |       |
|------|--------------|--------------|--------------|--------|----|----|-------|
| Pd63 | 3.863159000  | 0.009165000  | 31.084006000 | XXXX 1 | xx | Pd | 0.000 |
| Pd64 | 6.169100000  | 4.145169000  | 29.882108000 | XXXX 1 | xx | Pd | 0.000 |
| Pd65 | 1.565448000  | 4.170276000  | 29.880902000 | XXXX 1 | xx | Pd | 0.000 |
| Pd66 | 3.862290000  | 5.562428000  | 31.103680000 | XXXX 1 | xx | Pd | 0.000 |
| Pd67 | -0.051126000 | 5.582532000  | 28.080323000 | XXXX 1 | xx | Pd | 0.000 |
| Pd68 | 7.824707000  | 8.343898000  | 28.075461000 | XXXX 1 | xx | Pd | 0.000 |
| Pd69 | 7.809028000  | 2.776142000  | 27.963972000 | XXXX 1 | xx | Pd | 0.000 |
| Pd70 | 2.022405000  | 1.384641000  | 26.581171000 | XXXX 1 | xx | Pd | 0.000 |
| Pd71 | 1.985456000  | 4.172277000  | 26.617893000 | XXXX 1 | xx | Pd | 0.000 |
| Pd72 | 1.939336000  | 6.967173000  | 26.579649000 | XXXX 1 | xx | Pd | 0.000 |
| Pd73 | 3.963768000  | 2.781367000  | 28.335381000 | XXXX 1 | xx | Pd | 0.000 |
| Pd74 | 3.919869000  | 5.548594000  | 28.323663000 | XXXX 1 | xx | Pd | 0.000 |
| Pd75 | 5.970531000  | 6.960179000  | 29.695448000 | XXXX 1 | xx | Pd | 0.000 |
| Pd76 | 5.880600000  | 1.390382000  | 26.597993000 | XXXX 1 | xx | Pd | 0.000 |
| Pd77 | 5.891816000  | 4.172675000  | 26.612977000 | XXXX 1 | xx | Pd | 0.000 |
| Pd78 | 5.913577000  | 6.966196000  | 26.625469000 | XXXX 1 | xx | Pd | 0.000 |
| H79  | 5.028141000  | 6.964491000  | 31.244543000 | XXXX 1 | xx | H  | 0.000 |
| H80  | 4.713341000  | 5.575819000  | 26.707661000 | XXXX 1 | xx | H  | 0.000 |
| H81  | 5.022513000  | 1.383216000  | 31.317874000 | XXXX 1 | xx | H  | 0.000 |
| H82  | -0.657696000 | 5.676084000  | 29.805557000 | XXXX 1 | xx | H  | 0.000 |
| H83  | 2.723137000  | 4.150020000  | 28.356225000 | XXXX 1 | xx | H  | 0.000 |
| H84  | 4.650364000  | -0.010234000 | 26.605472000 | XXXX 1 | xx | H  | 0.000 |
| H85  | 5.024871000  | 4.188441000  | 31.320515000 | XXXX 1 | xx | H  | 0.000 |
| H86  | 2.707803000  | 4.182998000  | 31.314539000 | XXXX 1 | xx | H  | 0.000 |
| H87  | 2.731486000  | 1.402439000  | 28.340124000 | XXXX 1 | xx | H  | 0.000 |
| H88  | 2.708973000  | 1.389985000  | 31.306676000 | XXXX 1 | xx | H  | 0.000 |
| H89  | 4.629793000  | 2.785328000  | 26.629219000 | XXXX 1 | xx | H  | 0.000 |
| H90  | 2.729685000  | 6.970486000  | 28.278242000 | XXXX 1 | xx | H  | 0.000 |
| H91  | 2.690258000  | 6.963139000  | 31.243406000 | XXXX 1 | xx | H  | 0.000 |
| H92  | 6.679879000  | 4.176414000  | 25.003158000 | XXXX 1 | xx | H  | 0.000 |
| H93  | 6.668363000  | 1.390353000  | 24.987417000 | XXXX 1 | xx | H  | 0.000 |
| H94  | 6.680672000  | 6.962414000  | 24.995212000 | XXXX 1 | xx | H  | 0.000 |
| H95  | 7.214158000  | 8.245211000  | 29.800198000 | XXXX 1 | xx | H  | 0.000 |
| H96  | 2.754409000  | 4.116442000  | 24.931511000 | XXXX 1 | xx | H  | 0.000 |
| H97  | 0.755818000  | 5.546053000  | 26.405725000 | XXXX 1 | xx | H  | 0.000 |
| H98  | 2.751232000  | 7.026322000  | 24.928501000 | XXXX 1 | xx | H  | 0.000 |
| H99  | 4.765655000  | 5.567570000  | 23.511258000 | XXXX 1 | xx | H  | 0.000 |
| H100 | 0.853129000  | 2.764244000  | 26.295540000 | XXXX 1 | xx | H  | 0.000 |
| H101 | 2.814243000  | 1.392596000  | 24.908668000 | XXXX 1 | xx | H  | 0.000 |
| H102 | 0.756815000  | 8.391391000  | 26.409586000 | XXXX 1 | xx | H  | 0.000 |
| N103 | 7.809180000  | 2.781529000  | 29.958527000 | XXXX 1 | xx | N  | 0.000 |
| end  |              |              |              |        |    |    |       |

### $H_{r_i}$ -NH/Pd(110) ( $r_i = 0.25$ )

|      |             |             |              |         |         |              |       |
|------|-------------|-------------|--------------|---------|---------|--------------|-------|
| PBC  | 7.8743      | 8.3520      | 45.3120      | 90.0000 | 90.0000 | 90.0000 (P1) |       |
| Pd1  | 5.905756000 | 1.392028000 | 23.351992000 | XXXX 1  | xx      | Pd           | 0.000 |
| Pd2  | 5.905756000 | 4.176000000 | 23.351992000 | XXXX 1  | xx      | Pd           | 0.000 |
| Pd3  | 5.905756000 | 6.959972000 | 23.351992000 | XXXX 1  | xx      | Pd           | 0.000 |
| Pd4  | 1.968585000 | 1.392028000 | 23.351992000 | XXXX 1  | xx      | Pd           | 0.000 |
| Pd5  | 1.968585000 | 4.176000000 | 23.351992000 | XXXX 1  | xx      | Pd           | 0.000 |
| Pd6  | 1.968585000 | 6.959972000 | 23.351992000 | XXXX 1  | xx      | Pd           | 0.000 |
| Pd7  | 0.000000000 | 2.783972000 | 24.743977000 | XXXX 1  | xx      | Pd           | 0.000 |
| Pd8  | 0.000000000 | 5.568028000 | 24.743977000 | XXXX 1  | xx      | Pd           | 0.000 |
| Pd9  | 0.000000000 | 0.000000000 | 24.743977000 | XXXX 1  | xx      | Pd           | 0.000 |
| Pd10 | 0.000000000 | 0.000000000 | 21.960008000 | XXXX 1  | xx      | Pd           | 0.000 |
| Pd11 | 0.000000000 | 2.783972000 | 21.960008000 | XXXX 1  | xx      | Pd           | 0.000 |
| Pd12 | 0.000000000 | 5.568028000 | 21.960008000 | XXXX 1  | xx      | Pd           | 0.000 |
| Pd13 | 1.968585000 | 1.392028000 | 20.568023000 | XXXX 1  | xx      | Pd           | 0.000 |
| Pd14 | 1.968585000 | 4.176000000 | 20.568023000 | XXXX 1  | xx      | Pd           | 0.000 |
| Pd15 | 1.968585000 | 6.959972000 | 20.568023000 | XXXX 1  | xx      | Pd           | 0.000 |
| Pd16 | 3.937171000 | 0.000000000 | 21.960008000 | XXXX 1  | xx      | Pd           | 0.000 |
| Pd17 | 3.937171000 | 2.783972000 | 21.960008000 | XXXX 1  | xx      | Pd           | 0.000 |
| Pd18 | 3.937171000 | 5.568028000 | 21.960008000 | XXXX 1  | xx      | Pd           | 0.000 |
| Pd19 | 5.905756000 | 1.392028000 | 20.568023000 | XXXX 1  | xx      | Pd           | 0.000 |
| Pd20 | 5.905756000 | 4.176000000 | 20.568023000 | XXXX 1  | xx      | Pd           | 0.000 |
| Pd21 | 5.905756000 | 6.959972000 | 20.568023000 | XXXX 1  | xx      | Pd           | 0.000 |
| Pd22 | 3.937171000 | 0.000000000 | 19.176038000 | XXXX 1  | xx      | Pd           | 0.000 |
| Pd23 | 3.937171000 | 2.783972000 | 19.176038000 | XXXX 1  | xx      | Pd           | 0.000 |

|      |              |             |              |        |    |    |       |
|------|--------------|-------------|--------------|--------|----|----|-------|
| Pd24 | 3.937171000  | 5.568028000 | 19.176038000 | XXXX 1 | xx | Pd | 0.000 |
| Pd25 | 0.030552000  | 0.000585000 | 19.175585000 | XXXX 1 | xx | Pd | 0.000 |
| Pd26 | 0.030552000  | 2.784640000 | 19.175585000 | XXXX 1 | xx | Pd | 0.000 |
| Pd27 | 0.030474000  | 5.568612000 | 19.175585000 | XXXX 1 | xx | Pd | 0.000 |
| Pd28 | 1.984491000  | 1.391777000 | 17.725601000 | XXXX 1 | xx | Pd | 0.000 |
| Pd29 | 1.984413000  | 4.175749000 | 17.725148000 | XXXX 1 | xx | Pd | 0.000 |
| Pd30 | 1.984334000  | 6.959638000 | 17.725148000 | XXXX 1 | xx | Pd | 0.000 |
| Pd31 | 5.921662000  | 1.392362000 | 17.831631000 | XXXX 1 | xx | Pd | 0.000 |
| Pd32 | 5.921426000  | 4.176251000 | 17.831178000 | XXXX 1 | xx | Pd | 0.000 |
| Pd33 | 5.921505000  | 6.960139000 | 17.831178000 | XXXX 1 | xx | Pd | 0.000 |
| Pd34 | 0.040002000  | 8.351749000 | 16.401585000 | XXXX 1 | xx | Pd | 0.000 |
| Pd35 | 0.040159000  | 2.783638000 | 16.401585000 | XXXX 1 | xx | Pd | 0.000 |
| Pd36 | 0.039844000  | 5.567527000 | 16.401132000 | XXXX 1 | xx | Pd | 0.000 |
| Pd37 | 3.928115000  | 2.783388000 | 16.402491000 | XXXX 1 | xx | Pd | 0.000 |
| Pd38 | 3.928036000  | 5.567193000 | 16.402038000 | XXXX 1 | xx | Pd | 0.000 |
| Pd39 | 3.928351000  | 8.351499000 | 16.402944000 | XXXX 1 | xx | Pd | 0.000 |
| Pd40 | 5.920323000  | 1.391026000 | 15.136474000 | XXXX 1 | xx | Pd | 0.000 |
| Pd41 | 5.920087000  | 4.174831000 | 15.136020000 | XXXX 1 | xx | Pd | 0.000 |
| Pd42 | 5.920008000  | 6.958803000 | 15.136020000 | XXXX 1 | xx | Pd | 0.000 |
| H43  | 4.784472000  | 2.783509000 | 14.813653000 | XXXX 1 | xx | H  | 0.000 |
| H44  | 4.784352000  | 5.567528000 | 14.813308000 | XXXX 1 | xx | H  | 0.000 |
| H45  | 4.784497000  | 8.351801000 | 14.814017000 | XXXX 1 | xx | H  | 0.000 |
| H46  | 1.083100000  | 1.397647000 | 16.146732000 | XXXX 1 | xx | H  | 0.000 |
| H47  | 1.082979000  | 4.181726000 | 16.146330000 | XXXX 1 | xx | H  | 0.000 |
| H48  | 1.082862000  | 6.965576000 | 16.146515000 | XXXX 1 | xx | H  | 0.000 |
| H49  | 2.883688000  | 1.392031000 | 16.147297000 | XXXX 1 | xx | H  | 0.000 |
| H50  | 2.883508000  | 4.175967000 | 16.146767000 | XXXX 1 | xx | H  | 0.000 |
| H51  | 2.883805000  | 6.960290000 | 16.147130000 | XXXX 1 | xx | H  | 0.000 |
| H52  | 7.056688000  | 8.350437000 | 14.813892000 | XXXX 1 | xx | H  | 0.000 |
| H53  | 7.056864000  | 2.782554000 | 14.813815000 | XXXX 1 | xx | H  | 0.000 |
| H54  | 7.056564000  | 5.566429000 | 14.813346000 | XXXX 1 | xx | H  | 0.000 |
| Pd55 | 3.925726000  | 8.349452000 | 24.787019000 | XXXX 1 | xx | Pd | 0.000 |
| Pd56 | 3.926170000  | 2.787210000 | 24.787024000 | XXXX 1 | xx | Pd | 0.000 |
| Pd57 | 3.933285000  | 5.568290000 | 24.787863000 | XXXX 1 | xx | Pd | 0.000 |
| Pd58 | 2.030628000  | 6.977798000 | 29.103923000 | XXXX 1 | xx | Pd | 0.000 |
| Pd59 | 2.090103000  | 1.395074000 | 29.045028000 | XXXX 1 | xx | Pd | 0.000 |
| Pd60 | 2.030788000  | 4.164419000 | 29.103897000 | XXXX 1 | xx | Pd | 0.000 |
| Pd61 | 7.790035000  | 5.573261000 | 30.516000000 | XXXX 1 | xx | Pd | 0.000 |
| Pd62 | 7.814793000  | 8.331515000 | 30.527490000 | XXXX 1 | xx | Pd | 0.000 |
| Pd63 | 7.815050000  | 2.813604000 | 30.527598000 | XXXX 1 | xx | Pd | 0.000 |
| Pd64 | 5.831274000  | 1.395024000 | 29.041339000 | XXXX 1 | xx | Pd | 0.000 |
| Pd65 | 5.783770000  | 4.168669000 | 29.083821000 | XXXX 1 | xx | Pd | 0.000 |
| Pd66 | 5.783617000  | 6.974044000 | 29.083980000 | XXXX 1 | xx | Pd | 0.000 |
| Pd67 | 7.849084000  | 8.351175000 | 27.641046000 | XXXX 1 | xx | Pd | 0.000 |
| Pd68 | 7.849160000  | 2.787365000 | 27.640919000 | XXXX 1 | xx | Pd | 0.000 |
| Pd69 | 7.859172000  | 5.569464000 | 27.656765000 | XXXX 1 | xx | Pd | 0.000 |
| Pd70 | 1.939609000  | 1.393114000 | 26.212870000 | XXXX 1 | xx | Pd | 0.000 |
| Pd71 | 1.937923000  | 4.173545000 | 26.212740000 | XXXX 1 | xx | Pd | 0.000 |
| Pd72 | 1.937647000  | 6.964250000 | 26.212239000 | XXXX 1 | xx | Pd | 0.000 |
| Pd73 | 3.944000000  | 8.357410000 | 27.601746000 | XXXX 1 | xx | Pd | 0.000 |
| Pd74 | 3.943733000  | 2.782760000 | 27.602321000 | XXXX 1 | xx | Pd | 0.000 |
| Pd75 | 3.945724000  | 5.570879000 | 27.596134000 | XXXX 1 | xx | Pd | 0.000 |
| Pd76 | 5.914332000  | 1.392811000 | 26.172981000 | XXXX 1 | xx | Pd | 0.000 |
| Pd77 | 5.922336000  | 4.177281000 | 26.192779000 | XXXX 1 | xx | Pd | 0.000 |
| Pd78 | 5.923858000  | 6.961240000 | 26.190085000 | XXXX 1 | xx | Pd | 0.000 |
| N79  | 1.317611000  | 1.397892000 | 30.882450000 | XXXX 1 | xx | N  | 0.000 |
| H80  | 1.958971000  | 1.396849000 | 31.690554000 | XXXX 1 | xx | H  | 0.000 |
| H81  | 3.177778000  | 5.571400000 | 29.215151000 | XXXX 1 | xx | H  | 0.000 |
| H82  | 1.130548000  | 6.889019000 | 30.656603000 | XXXX 1 | xx | H  | 0.000 |
| H83  | 1.131219000  | 4.257537000 | 30.657519000 | XXXX 1 | xx | H  | 0.000 |
| H84  | -1.322012000 | 4.131936000 | 30.662973000 | XXXX 1 | xx | H  | 0.000 |
| H85  | 6.553088000  | 7.014823000 | 30.663330000 | XXXX 1 | xx | H  | 0.000 |
| end  |              |             |              |        |    |    |       |

**$H_{r_i} - NH/Pd(110)$  ( $r_i = 0.375$ )**

|     |             |             |              |         |         |              |       |
|-----|-------------|-------------|--------------|---------|---------|--------------|-------|
| PBC | 7.8743      | 8.3520      | 45.3120      | 90.0000 | 90.0000 | 90.0000 (P1) |       |
| Pd1 | 5.905756000 | 1.392028000 | 23.351992000 | XXXX 1  | xx      | Pd           | 0.000 |
| Pd2 | 5.905756000 | 4.176000000 | 23.351992000 | XXXX 1  | xx      | Pd           | 0.000 |

|      |             |             |              |        |    |    |       |
|------|-------------|-------------|--------------|--------|----|----|-------|
| Pd3  | 5.905756000 | 6.959972000 | 23.351992000 | XXXX 1 | xx | Pd | 0.000 |
| Pd4  | 1.968585000 | 1.392028000 | 23.351992000 | XXXX 1 | xx | Pd | 0.000 |
| Pd5  | 1.968585000 | 4.176000000 | 23.351992000 | XXXX 1 | xx | Pd | 0.000 |
| Pd6  | 1.968585000 | 6.959972000 | 23.351992000 | XXXX 1 | xx | Pd | 0.000 |
| Pd7  | 0.000000000 | 2.783972000 | 24.743977000 | XXXX 1 | xx | Pd | 0.000 |
| Pd8  | 0.000000000 | 5.568028000 | 24.743977000 | XXXX 1 | xx | Pd | 0.000 |
| Pd9  | 0.000000000 | 0.000000000 | 24.743977000 | XXXX 1 | xx | Pd | 0.000 |
| Pd10 | 0.000000000 | 0.000000000 | 21.960008000 | XXXX 1 | xx | Pd | 0.000 |
| Pd11 | 0.000000000 | 2.783972000 | 21.960008000 | XXXX 1 | xx | Pd | 0.000 |
| Pd12 | 0.000000000 | 5.568028000 | 21.960008000 | XXXX 1 | xx | Pd | 0.000 |
| Pd13 | 1.968585000 | 1.392028000 | 20.568023000 | XXXX 1 | xx | Pd | 0.000 |
| Pd14 | 1.968585000 | 4.176000000 | 20.568023000 | XXXX 1 | xx | Pd | 0.000 |
| Pd15 | 1.968585000 | 6.959972000 | 20.568023000 | XXXX 1 | xx | Pd | 0.000 |
| Pd16 | 3.937171000 | 0.000000000 | 21.960008000 | XXXX 1 | xx | Pd | 0.000 |
| Pd17 | 3.937171000 | 2.783972000 | 21.960008000 | XXXX 1 | xx | Pd | 0.000 |
| Pd18 | 3.937171000 | 5.568028000 | 21.960008000 | XXXX 1 | xx | Pd | 0.000 |
| Pd19 | 5.905756000 | 1.392028000 | 20.568023000 | XXXX 1 | xx | Pd | 0.000 |
| Pd20 | 5.905756000 | 4.176000000 | 20.568023000 | XXXX 1 | xx | Pd | 0.000 |
| Pd21 | 5.905756000 | 6.959972000 | 20.568023000 | XXXX 1 | xx | Pd | 0.000 |
| Pd22 | 3.937171000 | 0.000000000 | 19.176038000 | XXXX 1 | xx | Pd | 0.000 |
| Pd23 | 3.937171000 | 2.783972000 | 19.176038000 | XXXX 1 | xx | Pd | 0.000 |
| Pd24 | 3.937171000 | 5.568028000 | 19.176038000 | XXXX 1 | xx | Pd | 0.000 |
| Pd25 | 0.030552000 | 0.000585000 | 19.175585000 | XXXX 1 | xx | Pd | 0.000 |
| Pd26 | 0.030552000 | 2.784640000 | 19.175585000 | XXXX 1 | xx | Pd | 0.000 |
| Pd27 | 0.030474000 | 5.568612000 | 19.175585000 | XXXX 1 | xx | Pd | 0.000 |
| Pd28 | 1.984491000 | 1.391777000 | 17.725601000 | XXXX 1 | xx | Pd | 0.000 |
| Pd29 | 1.984413000 | 4.175749000 | 17.725148000 | XXXX 1 | xx | Pd | 0.000 |
| Pd30 | 1.984334000 | 6.959638000 | 17.725148000 | XXXX 1 | xx | Pd | 0.000 |
| Pd31 | 5.921662000 | 1.392362000 | 17.831631000 | XXXX 1 | xx | Pd | 0.000 |
| Pd32 | 5.921426000 | 4.176251000 | 17.831178000 | XXXX 1 | xx | Pd | 0.000 |
| Pd33 | 5.921505000 | 6.960139000 | 17.831178000 | XXXX 1 | xx | Pd | 0.000 |
| Pd34 | 0.040002000 | 8.351749000 | 16.401585000 | XXXX 1 | xx | Pd | 0.000 |
| Pd35 | 0.040159000 | 2.783638000 | 16.401585000 | XXXX 1 | xx | Pd | 0.000 |
| Pd36 | 0.039844000 | 5.567527000 | 16.401132000 | XXXX 1 | xx | Pd | 0.000 |
| Pd37 | 3.928115000 | 2.783388000 | 16.402491000 | XXXX 1 | xx | Pd | 0.000 |
| Pd38 | 3.928036000 | 5.567193000 | 16.402038000 | XXXX 1 | xx | Pd | 0.000 |
| Pd39 | 3.928351000 | 8.351499000 | 16.402944000 | XXXX 1 | xx | Pd | 0.000 |
| Pd40 | 5.920323000 | 1.391026000 | 15.136474000 | XXXX 1 | xx | Pd | 0.000 |
| Pd41 | 5.920087000 | 4.174831000 | 15.136020000 | XXXX 1 | xx | Pd | 0.000 |
| Pd42 | 5.920008000 | 6.958803000 | 15.136020000 | XXXX 1 | xx | Pd | 0.000 |
| H43  | 4.784472000 | 2.783509000 | 14.813653000 | XXXX 1 | xx | H  | 0.000 |
| H44  | 4.784352000 | 5.567528000 | 14.813308000 | XXXX 1 | xx | H  | 0.000 |
| H45  | 4.784497000 | 8.351801000 | 14.814017000 | XXXX 1 | xx | H  | 0.000 |
| H46  | 1.083100000 | 1.397647000 | 16.146732000 | XXXX 1 | xx | H  | 0.000 |
| H47  | 1.082979000 | 4.181726000 | 16.146330000 | XXXX 1 | xx | H  | 0.000 |
| H48  | 1.082862000 | 6.965576000 | 16.146515000 | XXXX 1 | xx | H  | 0.000 |
| H49  | 2.883688000 | 1.392031000 | 16.147297000 | XXXX 1 | xx | H  | 0.000 |
| H50  | 2.883508000 | 4.175967000 | 16.146767000 | XXXX 1 | xx | H  | 0.000 |
| H51  | 2.883805000 | 6.960290000 | 16.147130000 | XXXX 1 | xx | H  | 0.000 |
| H52  | 7.056688000 | 8.350437000 | 14.813892000 | XXXX 1 | xx | H  | 0.000 |
| H53  | 7.056864000 | 2.782554000 | 14.813815000 | XXXX 1 | xx | H  | 0.000 |
| H54  | 7.056564000 | 5.566429000 | 14.813346000 | XXXX 1 | xx | H  | 0.000 |
| Pd55 | 3.936384000 | 8.351879000 | 24.795597000 | XXXX 1 | xx | Pd | 0.000 |
| Pd56 | 3.927788000 | 2.781059000 | 24.808279000 | XXXX 1 | xx | Pd | 0.000 |
| Pd57 | 3.936783000 | 5.564805000 | 24.795488000 | XXXX 1 | xx | Pd | 0.000 |
| Pd58 | 2.027672000 | 1.397610000 | 29.151537000 | XXXX 1 | xx | Pd | 0.000 |
| Pd59 | 2.026495000 | 4.157961000 | 29.151283000 | XXXX 1 | xx | Pd | 0.000 |
| Pd60 | 2.026345000 | 6.954042000 | 29.160652000 | XXXX 1 | xx | Pd | 0.000 |
| Pd61 | 7.852838000 | 8.350924000 | 30.659753000 | XXXX 1 | xx | Pd | 0.000 |
| Pd62 | 0.021094000 | 2.774159000 | 30.604337000 | XXXX 1 | xx | Pd | 0.000 |
| Pd63 | 7.855261000 | 5.548670000 | 30.659128000 | XXXX 1 | xx | Pd | 0.000 |
| Pd64 | 5.841970000 | 1.372266000 | 29.133103000 | XXXX 1 | xx | Pd | 0.000 |
| Pd65 | 5.842335000 | 4.183799000 | 29.134196000 | XXXX 1 | xx | Pd | 0.000 |
| Pd66 | 5.787536000 | 6.954335000 | 29.036792000 | XXXX 1 | xx | Pd | 0.000 |
| Pd67 | 0.009963000 | 8.349035000 | 27.672350000 | XXXX 1 | xx | Pd | 0.000 |
| Pd68 | 7.863547000 | 2.779614000 | 27.696790000 | XXXX 1 | xx | Pd | 0.000 |
| Pd69 | 0.009649000 | 5.561689000 | 27.672609000 | XXXX 1 | xx | Pd | 0.000 |
| Pd70 | 1.930510000 | 1.390107000 | 26.220440000 | XXXX 1 | xx | Pd | 0.000 |
| Pd71 | 1.930491000 | 4.171067000 | 26.220946000 | XXXX 1 | xx | Pd | 0.000 |

|      |             |             |              |        |    |    |       |
|------|-------------|-------------|--------------|--------|----|----|-------|
| Pd72 | 1.942547000 | 6.957189000 | 26.207291000 | XXXX 1 | xx | Pd | 0.000 |
| Pd73 | 3.932904000 | 8.355682000 | 27.597629000 | XXXX 1 | xx | Pd | 0.000 |
| Pd74 | 3.907458000 | 2.779111000 | 27.631881000 | XXXX 1 | xx | Pd | 0.000 |
| Pd75 | 3.933295000 | 5.553685000 | 27.598559000 | XXXX 1 | xx | Pd | 0.000 |
| Pd76 | 5.931613000 | 1.388530000 | 26.217356000 | XXXX 1 | xx | Pd | 0.000 |
| Pd77 | 5.931919000 | 4.171028000 | 26.217085000 | XXXX 1 | xx | Pd | 0.000 |
| Pd78 | 5.933071000 | 6.955904000 | 26.221341000 | XXXX 1 | xx | Pd | 0.000 |
| N79  | 6.402194000 | 6.947930000 | 30.923349000 | XXXX 1 | xx | N  | 0.000 |
| H80  | 1.219173000 | 1.317799000 | 30.743348000 | XXXX 1 | xx | H  | 0.000 |
| H81  | 3.181821000 | 8.368122000 | 29.229584000 | XXXX 1 | xx | H  | 0.000 |
| H82  | 6.690213000 | 1.435585000 | 30.739222000 | XXXX 1 | xx | H  | 0.000 |
| H83  | 4.688731000 | 2.778123000 | 29.243130000 | XXXX 1 | xx | H  | 0.000 |
| H84  | 5.695299000 | 6.944211000 | 31.676065000 | XXXX 1 | xx | H  | 0.000 |
| H85  | 3.181401000 | 5.539323000 | 29.229882000 | XXXX 1 | xx | H  | 0.000 |
| H86  | 6.691053000 | 4.110808000 | 30.739860000 | XXXX 1 | xx | H  | 0.000 |
| H87  | 1.220466000 | 4.227845000 | 30.744272000 | XXXX 1 | xx | H  | 0.000 |
| H88  | 1.251673000 | 6.949708000 | 30.765639000 | XXXX 1 | xx | H  | 0.000 |
| end  |             |             |              |        |    |    |       |

**$H_{r_i}$ -NH/Pd(110) ( $r_i = 0.5$ )**

| PBC  | 7.8743      | 8.3520      | 45.3120      | 90.0000 | 90.0000 | 90.0000 (P1) |       |  |
|------|-------------|-------------|--------------|---------|---------|--------------|-------|--|
| Pd1  | 5.905756000 | 1.392028000 | 23.351992000 | XXXX 1  | xx      | Pd           | 0.000 |  |
| Pd2  | 5.905756000 | 4.176000000 | 23.351992000 | XXXX 1  | xx      | Pd           | 0.000 |  |
| Pd3  | 5.905756000 | 6.959972000 | 23.351992000 | XXXX 1  | xx      | Pd           | 0.000 |  |
| Pd4  | 1.968585000 | 1.392028000 | 23.351992000 | XXXX 1  | xx      | Pd           | 0.000 |  |
| Pd5  | 1.968585000 | 4.176000000 | 23.351992000 | XXXX 1  | xx      | Pd           | 0.000 |  |
| Pd6  | 1.968585000 | 6.959972000 | 23.351992000 | XXXX 1  | xx      | Pd           | 0.000 |  |
| Pd7  | 0.000000000 | 2.783972000 | 24.743977000 | XXXX 1  | xx      | Pd           | 0.000 |  |
| Pd8  | 0.000000000 | 5.568028000 | 24.743977000 | XXXX 1  | xx      | Pd           | 0.000 |  |
| Pd9  | 0.000000000 | 0.000000000 | 24.743977000 | XXXX 1  | xx      | Pd           | 0.000 |  |
| Pd10 | 0.000000000 | 0.000000000 | 21.960008000 | XXXX 1  | xx      | Pd           | 0.000 |  |
| Pd11 | 0.000000000 | 2.783972000 | 21.960008000 | XXXX 1  | xx      | Pd           | 0.000 |  |
| Pd12 | 0.000000000 | 5.568028000 | 21.960008000 | XXXX 1  | xx      | Pd           | 0.000 |  |
| Pd13 | 1.968585000 | 1.392028000 | 20.568023000 | XXXX 1  | xx      | Pd           | 0.000 |  |
| Pd14 | 1.968585000 | 4.176000000 | 20.568023000 | XXXX 1  | xx      | Pd           | 0.000 |  |
| Pd15 | 1.968585000 | 6.959972000 | 20.568023000 | XXXX 1  | xx      | Pd           | 0.000 |  |
| Pd16 | 3.937171000 | 0.000000000 | 21.960008000 | XXXX 1  | xx      | Pd           | 0.000 |  |
| Pd17 | 3.937171000 | 2.783972000 | 21.960008000 | XXXX 1  | xx      | Pd           | 0.000 |  |
| Pd18 | 3.937171000 | 5.568028000 | 21.960008000 | XXXX 1  | xx      | Pd           | 0.000 |  |
| Pd19 | 5.905756000 | 1.392028000 | 20.568023000 | XXXX 1  | xx      | Pd           | 0.000 |  |
| Pd20 | 5.905756000 | 4.176000000 | 20.568023000 | XXXX 1  | xx      | Pd           | 0.000 |  |
| Pd21 | 5.905756000 | 6.959972000 | 20.568023000 | XXXX 1  | xx      | Pd           | 0.000 |  |
| Pd22 | 3.937171000 | 0.000000000 | 19.176038000 | XXXX 1  | xx      | Pd           | 0.000 |  |
| Pd23 | 3.937171000 | 2.783972000 | 19.176038000 | XXXX 1  | xx      | Pd           | 0.000 |  |
| Pd24 | 3.937171000 | 5.568028000 | 19.176038000 | XXXX 1  | xx      | Pd           | 0.000 |  |
| Pd25 | 0.030552000 | 0.000585000 | 19.175585000 | XXXX 1  | xx      | Pd           | 0.000 |  |
| Pd26 | 0.030552000 | 2.784640000 | 19.175585000 | XXXX 1  | xx      | Pd           | 0.000 |  |
| Pd27 | 0.030474000 | 5.568612000 | 19.175585000 | XXXX 1  | xx      | Pd           | 0.000 |  |
| Pd28 | 1.984491000 | 1.391777000 | 17.725601000 | XXXX 1  | xx      | Pd           | 0.000 |  |
| Pd29 | 1.984413000 | 4.175749000 | 17.725148000 | XXXX 1  | xx      | Pd           | 0.000 |  |
| Pd30 | 1.984334000 | 6.959638000 | 17.725148000 | XXXX 1  | xx      | Pd           | 0.000 |  |
| Pd31 | 5.921662000 | 1.392362000 | 17.831631000 | XXXX 1  | xx      | Pd           | 0.000 |  |
| Pd32 | 5.921426000 | 4.176251000 | 17.831178000 | XXXX 1  | xx      | Pd           | 0.000 |  |
| Pd33 | 5.921505000 | 6.960139000 | 17.831178000 | XXXX 1  | xx      | Pd           | 0.000 |  |
| Pd34 | 0.040002000 | 8.351749000 | 16.401585000 | XXXX 1  | xx      | Pd           | 0.000 |  |
| Pd35 | 0.040159000 | 2.783638000 | 16.401585000 | XXXX 1  | xx      | Pd           | 0.000 |  |
| Pd36 | 0.039844000 | 5.567527000 | 16.401132000 | XXXX 1  | xx      | Pd           | 0.000 |  |
| Pd37 | 3.928115000 | 2.783388000 | 16.402491000 | XXXX 1  | xx      | Pd           | 0.000 |  |
| Pd38 | 3.928036000 | 5.567193000 | 16.402038000 | XXXX 1  | xx      | Pd           | 0.000 |  |
| Pd39 | 3.928351000 | 8.351499000 | 16.402944000 | XXXX 1  | xx      | Pd           | 0.000 |  |
| Pd40 | 5.920323000 | 1.391026000 | 15.136474000 | XXXX 1  | xx      | Pd           | 0.000 |  |
| Pd41 | 5.920087000 | 4.174831000 | 15.136020000 | XXXX 1  | xx      | Pd           | 0.000 |  |
| Pd42 | 5.920008000 | 6.958803000 | 15.136020000 | XXXX 1  | xx      | Pd           | 0.000 |  |
| H43  | 4.784448000 | 2.783509000 | 14.813653000 | XXXX 1  | xx      | H            | 0.000 |  |
| H44  | 4.784327000 | 5.567528000 | 14.813308000 | XXXX 1  | xx      | H            | 0.000 |  |
| H45  | 4.784472000 | 8.351801000 | 14.814017000 | XXXX 1  | xx      | H            | 0.000 |  |
| H46  | 1.083094000 | 1.397647000 | 16.146732000 | XXXX 1  | xx      | H            | 0.000 |  |
| H47  | 1.082973000 | 4.181726000 | 16.146330000 | XXXX 1  | xx      | H            | 0.000 |  |
| H48  | 1.082856000 | 6.965576000 | 16.146515000 | XXXX 1  | xx      | H            | 0.000 |  |



|      |             |             |              |        |    |    |       |
|------|-------------|-------------|--------------|--------|----|----|-------|
| H49  | 2.883673000 | 1.392031000 | 16.147297000 | XXXX 1 | xx | H  | 0.000 |
| H50  | 2.883493000 | 4.175967000 | 16.146767000 | XXXX 1 | xx | H  | 0.000 |
| H51  | 2.883790000 | 6.960290000 | 16.147130000 | XXXX 1 | xx | H  | 0.000 |
| H52  | 7.056651000 | 8.350437000 | 14.813892000 | XXXX 1 | xx | H  | 0.000 |
| H53  | 7.056827000 | 2.782554000 | 14.813815000 | XXXX 1 | xx | H  | 0.000 |
| H54  | 7.056528000 | 5.566429000 | 14.813346000 | XXXX 1 | xx | H  | 0.000 |
| Pd55 | 3.929526000 | 8.350637000 | 24.805141000 | XXXX 1 | xx | Pd | 0.000 |
| Pd56 | 3.924454000 | 2.783381000 | 24.801541000 | XXXX 1 | xx | Pd | 0.000 |
| Pd57 | 3.930144000 | 5.568470000 | 24.805193000 | XXXX 1 | xx | Pd | 0.000 |
| Pd58 | 1.821308000 | 4.158414000 | 29.220533000 | XXXX 1 | xx | Pd | 0.000 |
| Pd59 | 1.791009000 | 6.955836000 | 29.262756000 | XXXX 1 | xx | Pd | 0.000 |
| Pd60 | 1.821435000 | 1.402593000 | 29.220810000 | XXXX 1 | xx | Pd | 0.000 |
| Pd61 | 6.101897000 | 4.207441000 | 29.333725000 | XXXX 1 | xx | Pd | 0.000 |
| Pd62 | 6.312352000 | 6.956425000 | 29.310317000 | XXXX 1 | xx | Pd | 0.000 |
| Pd63 | 6.102840000 | 1.353582000 | 29.333559000 | XXXX 1 | xx | Pd | 0.000 |
| Pd64 | 3.910721000 | 8.355922000 | 30.710468000 | XXXX 1 | xx | Pd | 0.000 |
| Pd65 | 3.883328000 | 2.777640000 | 30.645954000 | XXXX 1 | xx | Pd | 0.000 |
| Pd66 | 3.910185000 | 5.554018000 | 30.711375000 | XXXX 1 | xx | Pd | 0.000 |
| Pd67 | 7.877598000 | 5.547442000 | 27.574813000 | XXXX 1 | xx | Pd | 0.000 |
| Pd68 | 7.877430000 | 0.015879000 | 27.574105000 | XXXX 1 | xx | Pd | 0.000 |
| Pd69 | 0.023067000 | 2.781545000 | 27.621513000 | XXXX 1 | xx | Pd | 0.000 |
| Pd70 | 1.979940000 | 1.389850000 | 26.216218000 | XXXX 1 | xx | Pd | 0.000 |
| Pd71 | 1.979815000 | 4.175562000 | 26.216164000 | XXXX 1 | xx | Pd | 0.000 |
| Pd72 | 1.976671000 | 6.959131000 | 26.223812000 | XXXX 1 | xx | Pd | 0.000 |
| Pd73 | 3.872989000 | 8.345760000 | 27.787875000 | XXXX 1 | xx | Pd | 0.000 |
| Pd74 | 3.873384000 | 2.781275000 | 27.776181000 | XXXX 1 | xx | Pd | 0.000 |
| Pd75 | 3.872301000 | 5.569989000 | 27.788259000 | XXXX 1 | xx | Pd | 0.000 |
| Pd76 | 5.899258000 | 1.393407000 | 26.199208000 | XXXX 1 | xx | Pd | 0.000 |
| Pd77 | 5.899716000 | 4.172658000 | 26.198843000 | XXXX 1 | xx | Pd | 0.000 |
| Pd78 | 5.896626000 | 6.958731000 | 26.206958000 | XXXX 1 | xx | Pd | 0.000 |
| H79  | 7.257832000 | 2.779412000 | 29.282386000 | XXXX 1 | xx | H  | 0.000 |
| H80  | 2.677747000 | 4.223468000 | 30.781166000 | XXXX 1 | xx | H  | 0.000 |
| H81  | 5.894993000 | 6.952551000 | 31.936692000 | XXXX 1 | xx | H  | 0.000 |
| H82  | 5.083622000 | 4.178134000 | 27.803651000 | XXXX 1 | xx | H  | 0.000 |
| H83  | 2.678953000 | 1.332020000 | 30.780026000 | XXXX 1 | xx | H  | 0.000 |
| H84  | 0.649236000 | 5.535530000 | 29.281110000 | XXXX 1 | xx | H  | 0.000 |
| H85  | 2.645194000 | 6.954588000 | 30.834557000 | XXXX 1 | xx | H  | 0.000 |
| H86  | 5.066884000 | 4.108042000 | 30.848633000 | XXXX 1 | xx | H  | 0.000 |
| H87  | 5.066901000 | 1.448403000 | 30.848423000 | XXXX 1 | xx | H  | 0.000 |
| H88  | 0.648329000 | 0.024617000 | 29.281112000 | XXXX 1 | xx | H  | 0.000 |
| H89  | 5.083943000 | 1.384257000 | 27.803894000 | XXXX 1 | xx | H  | 0.000 |
| H90  | 5.087377000 | 6.956793000 | 27.821969000 | XXXX 1 | xx | H  | 0.000 |
| N91  | 5.337701000 | 6.952328000 | 31.065809000 | XXXX 1 | xx | N  | 0.000 |

end

### $H_{r_i} - NH/Pd(110)$ ( $r_i = 1$ )

| PBC  | 7.8743      | 8.3520      | 45.3120      | 90.0000 | 90.0000 | 90.0000 (P1) |       |  |
|------|-------------|-------------|--------------|---------|---------|--------------|-------|--|
| Pd1  | 5.905756000 | 1.392028000 | 23.351992000 | XXXX 1  | xx      | Pd           | 0.000 |  |
| Pd2  | 5.905756000 | 4.176000000 | 23.351992000 | XXXX 1  | xx      | Pd           | 0.000 |  |
| Pd3  | 5.905756000 | 6.959972000 | 23.351992000 | XXXX 1  | xx      | Pd           | 0.000 |  |
| Pd4  | 1.968585000 | 1.392028000 | 23.351992000 | XXXX 1  | xx      | Pd           | 0.000 |  |
| Pd5  | 1.968585000 | 4.176000000 | 23.351992000 | XXXX 1  | xx      | Pd           | 0.000 |  |
| Pd6  | 1.968585000 | 6.959972000 | 23.351992000 | XXXX 1  | xx      | Pd           | 0.000 |  |
| Pd7  | 0.000000000 | 2.783972000 | 24.743977000 | XXXX 1  | xx      | Pd           | 0.000 |  |
| Pd8  | 0.000000000 | 5.568028000 | 24.743977000 | XXXX 1  | xx      | Pd           | 0.000 |  |
| Pd9  | 0.000000000 | 0.000000000 | 24.743977000 | XXXX 1  | xx      | Pd           | 0.000 |  |
| Pd10 | 0.000000000 | 0.000000000 | 21.960008000 | XXXX 1  | xx      | Pd           | 0.000 |  |
| Pd11 | 0.000000000 | 2.783972000 | 21.960008000 | XXXX 1  | xx      | Pd           | 0.000 |  |
| Pd12 | 0.000000000 | 5.568028000 | 21.960008000 | XXXX 1  | xx      | Pd           | 0.000 |  |
| Pd13 | 1.968585000 | 1.392028000 | 20.568023000 | XXXX 1  | xx      | Pd           | 0.000 |  |
| Pd14 | 1.968585000 | 4.176000000 | 20.568023000 | XXXX 1  | xx      | Pd           | 0.000 |  |
| Pd15 | 1.968585000 | 6.959972000 | 20.568023000 | XXXX 1  | xx      | Pd           | 0.000 |  |
| Pd16 | 3.937171000 | 0.000000000 | 21.960008000 | XXXX 1  | xx      | Pd           | 0.000 |  |
| Pd17 | 3.937171000 | 2.783972000 | 21.960008000 | XXXX 1  | xx      | Pd           | 0.000 |  |
| Pd18 | 3.937171000 | 5.568028000 | 21.960008000 | XXXX 1  | xx      | Pd           | 0.000 |  |
| Pd19 | 5.905756000 | 1.392028000 | 20.568023000 | XXXX 1  | xx      | Pd           | 0.000 |  |
| Pd20 | 5.905756000 | 4.176000000 | 20.568023000 | XXXX 1  | xx      | Pd           | 0.000 |  |
| Pd21 | 5.905756000 | 6.959972000 | 20.568023000 | XXXX 1  | xx      | Pd           | 0.000 |  |

|      |             |             |              |        |    |    |       |
|------|-------------|-------------|--------------|--------|----|----|-------|
| Pd22 | 3.937171000 | 0.000000000 | 19.176038000 | XXXX 1 | xx | Pd | 0.000 |
| Pd23 | 3.937171000 | 2.783972000 | 19.176038000 | XXXX 1 | xx | Pd | 0.000 |
| Pd24 | 3.937171000 | 5.568028000 | 19.176038000 | XXXX 1 | xx | Pd | 0.000 |
| Pd25 | 0.030552000 | 0.000585000 | 19.175585000 | XXXX 1 | xx | Pd | 0.000 |
| Pd26 | 0.030552000 | 2.784640000 | 19.175585000 | XXXX 1 | xx | Pd | 0.000 |
| Pd27 | 0.030474000 | 5.568612000 | 19.175585000 | XXXX 1 | xx | Pd | 0.000 |
| Pd28 | 1.984491000 | 1.391777000 | 17.725601000 | XXXX 1 | xx | Pd | 0.000 |
| Pd29 | 1.984413000 | 4.175749000 | 17.725148000 | XXXX 1 | xx | Pd | 0.000 |
| Pd30 | 1.984334000 | 6.959638000 | 17.725148000 | XXXX 1 | xx | Pd | 0.000 |
| Pd31 | 5.921662000 | 1.392362000 | 17.831631000 | XXXX 1 | xx | Pd | 0.000 |
| Pd32 | 5.921426000 | 4.176251000 | 17.831178000 | XXXX 1 | xx | Pd | 0.000 |
| Pd33 | 5.921505000 | 6.960139000 | 17.831178000 | XXXX 1 | xx | Pd | 0.000 |
| Pd34 | 0.040002000 | 8.351749000 | 16.401585000 | XXXX 1 | xx | Pd | 0.000 |
| Pd35 | 0.040159000 | 2.783638000 | 16.401585000 | XXXX 1 | xx | Pd | 0.000 |
| Pd36 | 0.039844000 | 5.567527000 | 16.401132000 | XXXX 1 | xx | Pd | 0.000 |
| Pd37 | 3.928115000 | 2.783388000 | 16.402491000 | XXXX 1 | xx | Pd | 0.000 |
| Pd38 | 3.928036000 | 5.567193000 | 16.402038000 | XXXX 1 | xx | Pd | 0.000 |
| Pd39 | 3.928351000 | 8.351499000 | 16.402944000 | XXXX 1 | xx | Pd | 0.000 |
| Pd40 | 5.920323000 | 1.391026000 | 15.136474000 | XXXX 1 | xx | Pd | 0.000 |
| Pd41 | 5.920087000 | 4.174831000 | 15.136020000 | XXXX 1 | xx | Pd | 0.000 |
| Pd42 | 5.920008000 | 6.958803000 | 15.136020000 | XXXX 1 | xx | Pd | 0.000 |
| H43  | 4.784448000 | 2.783509000 | 14.813653000 | XXXX 1 | xx | H  | 0.000 |
| H44  | 4.784327000 | 5.567528000 | 14.813308000 | XXXX 1 | xx | H  | 0.000 |
| H45  | 4.784472000 | 8.351801000 | 14.814017000 | XXXX 1 | xx | H  | 0.000 |
| H46  | 1.083094000 | 1.397647000 | 16.146732000 | XXXX 1 | xx | H  | 0.000 |
| H47  | 1.082973000 | 4.181726000 | 16.146330000 | XXXX 1 | xx | H  | 0.000 |
| H48  | 1.082856000 | 6.965576000 | 16.146515000 | XXXX 1 | xx | H  | 0.000 |
| H49  | 2.883673000 | 1.392031000 | 16.147297000 | XXXX 1 | xx | H  | 0.000 |
| H50  | 2.883493000 | 4.175967000 | 16.146767000 | XXXX 1 | xx | H  | 0.000 |
| H51  | 2.883790000 | 6.960290000 | 16.147130000 | XXXX 1 | xx | H  | 0.000 |
| H52  | 7.056651000 | 8.350437000 | 14.813892000 | XXXX 1 | xx | H  | 0.000 |
| H53  | 7.056827000 | 2.782554000 | 14.813815000 | XXXX 1 | xx | H  | 0.000 |
| H54  | 7.056528000 | 5.566429000 | 14.813346000 | XXXX 1 | xx | H  | 0.000 |
| Pd55 | 4.018123000 | 8.340731000 | 24.895961000 | XXXX 1 | xx | Pd | 0.000 |
| Pd56 | 4.022707000 | 2.772673000 | 24.900828000 | XXXX 1 | xx | Pd | 0.000 |
| Pd57 | 4.022531000 | 5.556774000 | 24.900840000 | XXXX 1 | xx | Pd | 0.000 |
| Pd58 | 3.909905000 | 2.710159000 | 31.165121000 | XXXX 1 | xx | Pd | 0.000 |
| Pd59 | 3.939691000 | 8.309775000 | 28.233960000 | XXXX 1 | xx | Pd | 0.000 |
| Pd60 | 1.730445000 | 6.906294000 | 29.756034000 | XXXX 1 | xx | Pd | 0.000 |
| Pd61 | 5.992543000 | 1.341161000 | 29.677715000 | XXXX 1 | xx | Pd | 0.000 |
| Pd62 | 1.732516000 | 1.352100000 | 29.758985000 | XXXX 1 | xx | Pd | 0.000 |
| Pd63 | 3.931413000 | 8.288883000 | 31.087484000 | XXXX 1 | xx | Pd | 0.000 |
| Pd64 | 6.018440000 | 4.120743000 | 29.692819000 | XXXX 1 | xx | Pd | 0.000 |
| Pd65 | 1.610908000 | 4.130436000 | 29.763752000 | XXXX 1 | xx | Pd | 0.000 |
| Pd66 | 3.905736000 | 5.515264000 | 31.164260000 | XXXX 1 | xx | Pd | 0.000 |
| Pd67 | 7.865645000 | 5.536648000 | 28.068788000 | XXXX 1 | xx | Pd | 0.000 |
| Pd68 | 7.874998000 | 8.310782000 | 28.115810000 | XXXX 1 | xx | Pd | 0.000 |
| Pd69 | 7.865965000 | 2.732106000 | 28.070224000 | XXXX 1 | xx | Pd | 0.000 |
| Pd70 | 1.974265000 | 1.363089000 | 26.527047000 | XXXX 1 | xx | Pd | 0.000 |
| Pd71 | 1.966915000 | 4.149647000 | 26.521294000 | XXXX 1 | xx | Pd | 0.000 |
| Pd72 | 1.972677000 | 6.936686000 | 26.525889000 | XXXX 1 | xx | Pd | 0.000 |
| Pd73 | 3.926377000 | 2.747641000 | 28.241326000 | XXXX 1 | xx | Pd | 0.000 |
| Pd74 | 3.926044000 | 5.520148000 | 28.239529000 | XXXX 1 | xx | Pd | 0.000 |
| Pd75 | 5.992755000 | 6.898596000 | 29.676892000 | XXXX 1 | xx | Pd | 0.000 |
| Pd76 | 5.940210000 | 1.362859000 | 26.617765000 | XXXX 1 | xx | Pd | 0.000 |
| Pd77 | 5.938882000 | 4.147109000 | 26.618402000 | XXXX 1 | xx | Pd | 0.000 |
| Pd78 | 5.940858000 | 6.932472000 | 26.617879000 | XXXX 1 | xx | Pd | 0.000 |
| H79  | 4.696514000 | 5.538260000 | 26.595735000 | XXXX 1 | xx | H  | 0.000 |
| H80  | 2.714470000 | 4.130131000 | 28.199651000 | XXXX 1 | xx | H  | 0.000 |
| H81  | 4.704844000 | 8.321082000 | 26.579712000 | XXXX 1 | xx | H  | 0.000 |
| H82  | 2.710559000 | 1.345267000 | 28.252621000 | XXXX 1 | xx | H  | 0.000 |
| H83  | 4.695023000 | 2.751968000 | 26.596721000 | XXXX 1 | xx | H  | 0.000 |
| H84  | 2.710846000 | 6.915594000 | 28.249816000 | XXXX 1 | xx | H  | 0.000 |
| H85  | 6.669280000 | 4.176193000 | 24.978395000 | XXXX 1 | xx | H  | 0.000 |
| H86  | 6.669067000 | 1.393065000 | 24.978047000 | XXXX 1 | xx | H  | 0.000 |
| H87  | 6.669167000 | 6.959805000 | 24.977986000 | XXXX 1 | xx | H  | 0.000 |
| H88  | 2.834616000 | 4.164592000 | 24.895985000 | XXXX 1 | xx | H  | 0.000 |
| H89  | 0.762628000 | 5.547479000 | 26.391529000 | XXXX 1 | xx | H  | 0.000 |
| H90  | 2.828361000 | 6.946772000 | 24.899483000 | XXXX 1 | xx | H  | 0.000 |

|      |             |             |              |        |    |   |       |
|------|-------------|-------------|--------------|--------|----|---|-------|
| H91  | 0.762961000 | 2.752537000 | 26.391966000 | XXXX 1 | xx | H | 0.000 |
| H92  | 2.828792000 | 1.383117000 | 24.899330000 | XXXX 1 | xx | H | 0.000 |
| H93  | 0.760588000 | 8.327767000 | 26.396882000 | XXXX 1 | xx | H | 0.000 |
| H94  | 2.748540000 | 1.272514000 | 31.271898000 | XXXX 1 | xx | H | 0.000 |
| H95  | 2.744969000 | 6.950699000 | 31.268694000 | XXXX 1 | xx | H | 0.000 |
| H96  | 7.162064000 | 8.292114000 | 29.780604000 | XXXX 1 | xx | H | 0.000 |
| H97  | 5.111666000 | 6.853771000 | 31.254292000 | XXXX 1 | xx | H | 0.000 |
| H98  | 7.150845000 | 2.717272000 | 29.769204000 | XXXX 1 | xx | H | 0.000 |
| H99  | 5.155412000 | 4.113115000 | 31.258755000 | XXXX 1 | xx | H | 0.000 |
| H100 | 1.959475000 | 4.105465000 | 32.454506000 | XXXX 1 | xx | H | 0.000 |
| H101 | 5.114926000 | 1.366260000 | 31.256560000 | XXXX 1 | xx | H | 0.000 |
| H102 | 7.153191000 | 5.517182000 | 29.768043000 | XXXX 1 | xx | H | 0.000 |
| N103 | 2.500450000 | 4.109571000 | 31.572556000 | XXXX 1 | xx | N | 0.000 |
| end  |             |             |              |        |    |   |       |

**$H_{r_i} - NH_2/Pd(110)$  ( $r_i = 0.25$ )**

| PBC  | 7.8743      | 8.3520      | 45.3120      | 90.0000 | 90.0000 | 90.0000 (P1) |       |  |
|------|-------------|-------------|--------------|---------|---------|--------------|-------|--|
| Pd1  | 5.905756000 | 1.392028000 | 23.351992000 | XXXX 1  | xx      | Pd           | 0.000 |  |
| Pd2  | 5.905756000 | 4.176000000 | 23.351992000 | XXXX 1  | xx      | Pd           | 0.000 |  |
| Pd3  | 5.905756000 | 6.959972000 | 23.351992000 | XXXX 1  | xx      | Pd           | 0.000 |  |
| Pd4  | 1.968585000 | 1.392028000 | 23.351992000 | XXXX 1  | xx      | Pd           | 0.000 |  |
| Pd5  | 1.968585000 | 4.176000000 | 23.351992000 | XXXX 1  | xx      | Pd           | 0.000 |  |
| Pd6  | 1.968585000 | 6.959972000 | 23.351992000 | XXXX 1  | xx      | Pd           | 0.000 |  |
| Pd7  | 0.000000000 | 2.783972000 | 24.743977000 | XXXX 1  | xx      | Pd           | 0.000 |  |
| Pd8  | 0.000000000 | 5.568028000 | 24.743977000 | XXXX 1  | xx      | Pd           | 0.000 |  |
| Pd9  | 0.000000000 | 0.000000000 | 24.743977000 | XXXX 1  | xx      | Pd           | 0.000 |  |
| Pd10 | 0.000000000 | 0.000000000 | 21.960008000 | XXXX 1  | xx      | Pd           | 0.000 |  |
| Pd11 | 0.000000000 | 2.783972000 | 21.960008000 | XXXX 1  | xx      | Pd           | 0.000 |  |
| Pd12 | 0.000000000 | 5.568028000 | 21.960008000 | XXXX 1  | xx      | Pd           | 0.000 |  |
| Pd13 | 1.968585000 | 1.392028000 | 20.568023000 | XXXX 1  | xx      | Pd           | 0.000 |  |
| Pd14 | 1.968585000 | 4.176000000 | 20.568023000 | XXXX 1  | xx      | Pd           | 0.000 |  |
| Pd15 | 1.968585000 | 6.959972000 | 20.568023000 | XXXX 1  | xx      | Pd           | 0.000 |  |
| Pd16 | 3.937171000 | 0.000000000 | 21.960008000 | XXXX 1  | xx      | Pd           | 0.000 |  |
| Pd17 | 3.937171000 | 2.783972000 | 21.960008000 | XXXX 1  | xx      | Pd           | 0.000 |  |
| Pd18 | 3.937171000 | 5.568028000 | 21.960008000 | XXXX 1  | xx      | Pd           | 0.000 |  |
| Pd19 | 5.905756000 | 1.392028000 | 20.568023000 | XXXX 1  | xx      | Pd           | 0.000 |  |
| Pd20 | 5.905756000 | 4.176000000 | 20.568023000 | XXXX 1  | xx      | Pd           | 0.000 |  |
| Pd21 | 5.905756000 | 6.959972000 | 20.568023000 | XXXX 1  | xx      | Pd           | 0.000 |  |
| Pd22 | 3.937171000 | 0.000000000 | 19.176038000 | XXXX 1  | xx      | Pd           | 0.000 |  |
| Pd23 | 3.937171000 | 2.783972000 | 19.176038000 | XXXX 1  | xx      | Pd           | 0.000 |  |
| Pd24 | 3.937171000 | 5.568028000 | 19.176038000 | XXXX 1  | xx      | Pd           | 0.000 |  |
| Pd25 | 0.030552000 | 0.000585000 | 19.175585000 | XXXX 1  | xx      | Pd           | 0.000 |  |
| Pd26 | 0.030552000 | 2.784640000 | 19.175585000 | XXXX 1  | xx      | Pd           | 0.000 |  |
| Pd27 | 0.030474000 | 5.568612000 | 19.175585000 | XXXX 1  | xx      | Pd           | 0.000 |  |
| Pd28 | 1.984491000 | 1.391777000 | 17.725601000 | XXXX 1  | xx      | Pd           | 0.000 |  |
| Pd29 | 1.984413000 | 4.175749000 | 17.725148000 | XXXX 1  | xx      | Pd           | 0.000 |  |
| Pd30 | 1.984334000 | 6.959638000 | 17.725148000 | XXXX 1  | xx      | Pd           | 0.000 |  |
| Pd31 | 5.921662000 | 1.392362000 | 17.831631000 | XXXX 1  | xx      | Pd           | 0.000 |  |
| Pd32 | 5.921426000 | 4.176251000 | 17.831178000 | XXXX 1  | xx      | Pd           | 0.000 |  |
| Pd33 | 5.921505000 | 6.960139000 | 17.831178000 | XXXX 1  | xx      | Pd           | 0.000 |  |
| Pd34 | 0.040002000 | 8.351749000 | 16.401585000 | XXXX 1  | xx      | Pd           | 0.000 |  |
| Pd35 | 0.040159000 | 2.783638000 | 16.401585000 | XXXX 1  | xx      | Pd           | 0.000 |  |
| Pd36 | 0.039844000 | 5.567527000 | 16.401132000 | XXXX 1  | xx      | Pd           | 0.000 |  |
| Pd37 | 3.928115000 | 2.783388000 | 16.402491000 | XXXX 1  | xx      | Pd           | 0.000 |  |
| Pd38 | 3.928036000 | 5.567193000 | 16.402038000 | XXXX 1  | xx      | Pd           | 0.000 |  |
| Pd39 | 3.928351000 | 8.351499000 | 16.402944000 | XXXX 1  | xx      | Pd           | 0.000 |  |
| Pd40 | 5.920323000 | 1.391026000 | 15.136474000 | XXXX 1  | xx      | Pd           | 0.000 |  |
| Pd41 | 5.920087000 | 4.174831000 | 15.136020000 | XXXX 1  | xx      | Pd           | 0.000 |  |
| Pd42 | 5.920008000 | 6.958803000 | 15.136020000 | XXXX 1  | xx      | Pd           | 0.000 |  |
| H43  | 4.784472000 | 2.783509000 | 14.813653000 | XXXX 1  | xx      | H            | 0.000 |  |
| H44  | 4.784352000 | 5.567528000 | 14.813308000 | XXXX 1  | xx      | H            | 0.000 |  |
| H45  | 4.784497000 | 8.351801000 | 14.814017000 | XXXX 1  | xx      | H            | 0.000 |  |
| H46  | 1.083100000 | 1.397647000 | 16.146732000 | XXXX 1  | xx      | H            | 0.000 |  |
| H47  | 1.082979000 | 4.181726000 | 16.146330000 | XXXX 1  | xx      | H            | 0.000 |  |
| H48  | 1.082862000 | 6.965576000 | 16.146515000 | XXXX 1  | xx      | H            | 0.000 |  |
| H49  | 2.883688000 | 1.392031000 | 16.147297000 | XXXX 1  | xx      | H            | 0.000 |  |
| H50  | 2.883508000 | 4.175967000 | 16.146767000 | XXXX 1  | xx      | H            | 0.000 |  |
| H51  | 2.883805000 | 6.960290000 | 16.147130000 | XXXX 1  | xx      | H            | 0.000 |  |

|      |              |             |              |        |    |    |       |
|------|--------------|-------------|--------------|--------|----|----|-------|
| H52  | 7.056688000  | 8.350437000 | 14.813892000 | XXXX 1 | xx | H  | 0.000 |
| H53  | 7.056864000  | 2.782554000 | 14.813815000 | XXXX 1 | xx | H  | 0.000 |
| H54  | 7.056564000  | 5.566429000 | 14.813346000 | XXXX 1 | xx | H  | 0.000 |
| Pd55 | 3.930696000  | 8.354159000 | 24.805257000 | XXXX 1 | xx | Pd | 0.000 |
| Pd56 | 3.929680000  | 2.783749000 | 24.798558000 | XXXX 1 | xx | Pd | 0.000 |
| Pd57 | 3.929947000  | 5.572079000 | 24.798546000 | XXXX 1 | xx | Pd | 0.000 |
| Pd58 | 3.933520000  | 2.838094000 | 30.492131000 | XXXX 1 | xx | Pd | 0.000 |
| Pd59 | 5.987151000  | 4.190903000 | 29.050613000 | XXXX 1 | xx | Pd | 0.000 |
| Pd60 | 6.021582000  | 6.975276000 | 29.112017000 | XXXX 1 | xx | Pd | 0.000 |
| Pd61 | 3.927138000  | 0.024761000 | 30.512340000 | XXXX 1 | xx | Pd | 0.000 |
| Pd62 | 1.849041000  | 1.411805000 | 29.110788000 | XXXX 1 | xx | Pd | 0.000 |
| Pd63 | 3.933664000  | 5.565106000 | 30.486474000 | XXXX 1 | xx | Pd | 0.000 |
| Pd64 | 1.849300000  | 6.971642000 | 29.109881000 | XXXX 1 | xx | Pd | 0.000 |
| Pd65 | 6.022066000  | 1.406535000 | 29.111499000 | XXXX 1 | xx | Pd | 0.000 |
| Pd66 | 1.866341000  | 4.191549000 | 29.065771000 | XXXX 1 | xx | Pd | 0.000 |
| Pd67 | 7.866667000  | 0.010869000 | 27.617323000 | XXXX 1 | xx | Pd | 0.000 |
| Pd68 | 7.868882000  | 2.796774000 | 27.619035000 | XXXX 1 | xx | Pd | 0.000 |
| Pd69 | -0.005439000 | 5.576758000 | 27.619652000 | XXXX 1 | xx | Pd | 0.000 |
| Pd70 | 1.972441000  | 1.397904000 | 26.229204000 | XXXX 1 | xx | Pd | 0.000 |
| Pd71 | 1.977528000  | 4.180997000 | 26.211333000 | XXXX 1 | xx | Pd | 0.000 |
| Pd72 | 1.972169000  | 6.964100000 | 26.228535000 | XXXX 1 | xx | Pd | 0.000 |
| Pd73 | 3.938896000  | 8.360077000 | 27.690997000 | XXXX 1 | xx | Pd | 0.000 |
| Pd74 | 3.928375000  | 2.783678000 | 27.695294000 | XXXX 1 | xx | Pd | 0.000 |
| Pd75 | 3.928076000  | 5.585112000 | 27.693385000 | XXXX 1 | xx | Pd | 0.000 |
| Pd76 | 5.891821000  | 1.398952000 | 26.221115000 | XXXX 1 | xx | Pd | 0.000 |
| Pd77 | 5.885311000  | 4.180275000 | 26.203511000 | XXXX 1 | xx | Pd | 0.000 |
| Pd78 | 5.892237000  | 6.962124000 | 26.220448000 | XXXX 1 | xx | Pd | 0.000 |
| N79  | 4.318132000  | 4.205270000 | 32.023586000 | XXXX 1 | xx | N  | 0.000 |
| H80  | 5.136811000  | 6.984337000 | 30.659174000 | XXXX 1 | xx | H  | 0.000 |
| H81  | 5.138997000  | 1.422695000 | 30.658760000 | XXXX 1 | xx | H  | 0.000 |
| H82  | 2.708585000  | 1.398256000 | 30.658568000 | XXXX 1 | xx | H  | 0.000 |
| H83  | 3.634428000  | 4.205653000 | 32.789156000 | XXXX 1 | xx | H  | 0.000 |
| H84  | 5.273152000  | 4.207520000 | 32.398584000 | XXXX 1 | xx | H  | 0.000 |
| H85  | 2.707127000  | 7.011319000 | 30.658555000 | XXXX 1 | xx | H  | 0.000 |
| end  |              |             |              |        |    |    |       |

**$H_{r_i}$ -NH<sub>2</sub>/Pd(110) ( $r_i = 0.375$ )**

|      |             |             |              |         |         |              |       |
|------|-------------|-------------|--------------|---------|---------|--------------|-------|
| PBC  | 7.8743      | 8.3520      | 45.3120      | 90.0000 | 90.0000 | 90.0000 (P1) |       |
| Pd1  | 5.905756000 | 1.392028000 | 23.351992000 | XXXX 1  | xx      | Pd           | 0.000 |
| Pd2  | 5.905756000 | 4.176000000 | 23.351992000 | XXXX 1  | xx      | Pd           | 0.000 |
| Pd3  | 5.905756000 | 6.959972000 | 23.351992000 | XXXX 1  | xx      | Pd           | 0.000 |
| Pd4  | 1.968585000 | 1.392028000 | 23.351992000 | XXXX 1  | xx      | Pd           | 0.000 |
| Pd5  | 1.968585000 | 4.176000000 | 23.351992000 | XXXX 1  | xx      | Pd           | 0.000 |
| Pd6  | 1.968585000 | 6.959972000 | 23.351992000 | XXXX 1  | xx      | Pd           | 0.000 |
| Pd7  | 0.000000000 | 2.783972000 | 24.743977000 | XXXX 1  | xx      | Pd           | 0.000 |
| Pd8  | 0.000000000 | 5.568028000 | 24.743977000 | XXXX 1  | xx      | Pd           | 0.000 |
| Pd9  | 0.000000000 | 0.000000000 | 24.743977000 | XXXX 1  | xx      | Pd           | 0.000 |
| Pd10 | 0.000000000 | 0.000000000 | 21.960008000 | XXXX 1  | xx      | Pd           | 0.000 |
| Pd11 | 0.000000000 | 2.783972000 | 21.960008000 | XXXX 1  | xx      | Pd           | 0.000 |
| Pd12 | 0.000000000 | 5.568028000 | 21.960008000 | XXXX 1  | xx      | Pd           | 0.000 |
| Pd13 | 1.968585000 | 1.392028000 | 20.568023000 | XXXX 1  | xx      | Pd           | 0.000 |
| Pd14 | 1.968585000 | 4.176000000 | 20.568023000 | XXXX 1  | xx      | Pd           | 0.000 |
| Pd15 | 1.968585000 | 6.959972000 | 20.568023000 | XXXX 1  | xx      | Pd           | 0.000 |
| Pd16 | 3.937171000 | 0.000000000 | 21.960008000 | XXXX 1  | xx      | Pd           | 0.000 |
| Pd17 | 3.937171000 | 2.783972000 | 21.960008000 | XXXX 1  | xx      | Pd           | 0.000 |
| Pd18 | 3.937171000 | 5.568028000 | 21.960008000 | XXXX 1  | xx      | Pd           | 0.000 |
| Pd19 | 5.905756000 | 1.392028000 | 20.568023000 | XXXX 1  | xx      | Pd           | 0.000 |
| Pd20 | 5.905756000 | 4.176000000 | 20.568023000 | XXXX 1  | xx      | Pd           | 0.000 |
| Pd21 | 5.905756000 | 6.959972000 | 20.568023000 | XXXX 1  | xx      | Pd           | 0.000 |
| Pd22 | 3.937171000 | 0.000000000 | 19.176038000 | XXXX 1  | xx      | Pd           | 0.000 |
| Pd23 | 3.937171000 | 2.783972000 | 19.176038000 | XXXX 1  | xx      | Pd           | 0.000 |
| Pd24 | 3.937171000 | 5.568028000 | 19.176038000 | XXXX 1  | xx      | Pd           | 0.000 |
| Pd25 | 0.030552000 | 0.000585000 | 19.175585000 | XXXX 1  | xx      | Pd           | 0.000 |
| Pd26 | 0.030552000 | 2.784640000 | 19.175585000 | XXXX 1  | xx      | Pd           | 0.000 |
| Pd27 | 0.030474000 | 5.568612000 | 19.175585000 | XXXX 1  | xx      | Pd           | 0.000 |
| Pd28 | 1.984491000 | 1.391777000 | 17.725601000 | XXXX 1  | xx      | Pd           | 0.000 |
| Pd29 | 1.984413000 | 4.175749000 | 17.725148000 | XXXX 1  | xx      | Pd           | 0.000 |

|      |             |              |              |        |    |    |       |
|------|-------------|--------------|--------------|--------|----|----|-------|
| Pd30 | 1.984334000 | 6.959638000  | 17.725148000 | XXXX 1 | xx | Pd | 0.000 |
| Pd31 | 5.921662000 | 1.392362000  | 17.831631000 | XXXX 1 | xx | Pd | 0.000 |
| Pd32 | 5.921426000 | 4.176251000  | 17.831178000 | XXXX 1 | xx | Pd | 0.000 |
| Pd33 | 5.921505000 | 6.960139000  | 17.831178000 | XXXX 1 | xx | Pd | 0.000 |
| Pd34 | 0.040002000 | 8.351749000  | 16.401585000 | XXXX 1 | xx | Pd | 0.000 |
| Pd35 | 0.040159000 | 2.783638000  | 16.401585000 | XXXX 1 | xx | Pd | 0.000 |
| Pd36 | 0.039844000 | 5.567527000  | 16.401132000 | XXXX 1 | xx | Pd | 0.000 |
| Pd37 | 3.928115000 | 2.783388000  | 16.402491000 | XXXX 1 | xx | Pd | 0.000 |
| Pd38 | 3.928036000 | 5.567193000  | 16.402038000 | XXXX 1 | xx | Pd | 0.000 |
| Pd39 | 3.928351000 | 8.351499000  | 16.402944000 | XXXX 1 | xx | Pd | 0.000 |
| Pd40 | 5.920323000 | 1.391026000  | 15.136474000 | XXXX 1 | xx | Pd | 0.000 |
| Pd41 | 5.920087000 | 4.174831000  | 15.136020000 | XXXX 1 | xx | Pd | 0.000 |
| Pd42 | 5.920008000 | 6.958803000  | 15.136020000 | XXXX 1 | xx | Pd | 0.000 |
| H43  | 4.784448000 | 2.783509000  | 14.813653000 | XXXX 1 | xx | H  | 0.000 |
| H44  | 4.784327000 | 5.567528000  | 14.813308000 | XXXX 1 | xx | H  | 0.000 |
| H45  | 4.784472000 | 8.351801000  | 14.814017000 | XXXX 1 | xx | H  | 0.000 |
| H46  | 1.083094000 | 1.397647000  | 16.146732000 | XXXX 1 | xx | H  | 0.000 |
| H47  | 1.082973000 | 4.181726000  | 16.146330000 | XXXX 1 | xx | H  | 0.000 |
| H48  | 1.082856000 | 6.965576000  | 16.146515000 | XXXX 1 | xx | H  | 0.000 |
| H49  | 2.883673000 | 1.392031000  | 16.147297000 | XXXX 1 | xx | H  | 0.000 |
| H50  | 2.883493000 | 4.175967000  | 16.146767000 | XXXX 1 | xx | H  | 0.000 |
| H51  | 2.883790000 | 6.960290000  | 16.147130000 | XXXX 1 | xx | H  | 0.000 |
| H52  | 7.056651000 | 8.350437000  | 14.813892000 | XXXX 1 | xx | H  | 0.000 |
| H53  | 7.056827000 | 2.782554000  | 14.813815000 | XXXX 1 | xx | H  | 0.000 |
| H54  | 7.056528000 | 5.566429000  | 14.813346000 | XXXX 1 | xx | H  | 0.000 |
| Pd55 | 3.937483000 | 8.352332000  | 24.782980000 | XXXX 1 | xx | Pd | 0.000 |
| Pd56 | 3.939098000 | 2.788260000  | 24.792720000 | XXXX 1 | xx | Pd | 0.000 |
| Pd57 | 3.938360000 | 5.565254000  | 24.804044000 | XXXX 1 | xx | Pd | 0.000 |
| Pd58 | 1.770765000 | 4.165239000  | 29.161879000 | XXXX 1 | xx | Pd | 0.000 |
| Pd59 | 1.865001000 | 6.960465000  | 29.089801000 | XXXX 1 | xx | Pd | 0.000 |
| Pd60 | 1.885828000 | 1.390308000  | 29.034685000 | XXXX 1 | xx | Pd | 0.000 |
| Pd61 | 5.999997000 | 1.390204000  | 29.035761000 | XXXX 1 | xx | Pd | 0.000 |
| Pd62 | 6.126302000 | 4.164536000  | 29.171331000 | XXXX 1 | xx | Pd | 0.000 |
| Pd63 | 6.020621000 | 6.960691000  | 29.091343000 | XXXX 1 | xx | Pd | 0.000 |
| Pd64 | 3.943420000 | -0.000300000 | 30.474792000 | XXXX 1 | xx | Pd | 0.000 |
| Pd65 | 3.945221000 | 2.785424000  | 30.500653000 | XXXX 1 | xx | Pd | 0.000 |
| Pd66 | 3.944260000 | 5.567872000  | 30.519721000 | XXXX 1 | xx | Pd | 0.000 |
| Pd67 | 0.004751000 | 2.780478000  | 27.561641000 | XXXX 1 | xx | Pd | 0.000 |
| Pd68 | 0.002679000 | 5.561272000  | 27.552169000 | XXXX 1 | xx | Pd | 0.000 |
| Pd69 | 0.003684000 | 0.011675000  | 27.565458000 | XXXX 1 | xx | Pd | 0.000 |
| Pd70 | 1.982831000 | 1.395811000  | 26.182176000 | XXXX 1 | xx | Pd | 0.000 |
| Pd71 | 1.996464000 | 4.173974000  | 26.217941000 | XXXX 1 | xx | Pd | 0.000 |
| Pd72 | 1.991889000 | 6.955372000  | 26.195554000 | XXXX 1 | xx | Pd | 0.000 |
| Pd73 | 3.942235000 | 8.347797000  | 27.635384000 | XXXX 1 | xx | Pd | 0.000 |
| Pd74 | 3.944272000 | 2.796228000  | 27.687420000 | XXXX 1 | xx | Pd | 0.000 |
| Pd75 | 3.944553000 | 5.546060000  | 27.714551000 | XXXX 1 | xx | Pd | 0.000 |
| Pd76 | 5.894478000 | 1.396316000  | 26.180087000 | XXXX 1 | xx | Pd | 0.000 |
| Pd77 | 5.885027000 | 4.173987000  | 26.216323000 | XXXX 1 | xx | Pd | 0.000 |
| Pd78 | 5.885961000 | 6.955768000  | 26.193263000 | XXXX 1 | xx | Pd | 0.000 |
| H79  | 2.741625000 | 1.380142000  | 30.603025000 | XXXX 1 | xx | H  | 0.000 |
| H80  | 2.771500000 | 4.174013000  | 30.665981000 | XXXX 1 | xx | H  | 0.000 |
| H81  | 5.147352000 | 1.378625000  | 30.602546000 | XXXX 1 | xx | H  | 0.000 |
| H82  | 0.004140000 | 7.024024000  | 28.895593000 | XXXX 1 | xx | H  | 0.000 |
| H83  | 5.135486000 | 6.979394000  | 30.654304000 | XXXX 1 | xx | H  | 0.000 |
| H84  | 0.018973000 | 3.229136000  | 30.897625000 | XXXX 1 | xx | H  | 0.000 |
| H85  | 5.115935000 | 4.174034000  | 30.669079000 | XXXX 1 | xx | H  | 0.000 |
| H86  | 0.017874000 | 4.884739000  | 30.999794000 | XXXX 1 | xx | H  | 0.000 |
| N87  | 0.016531000 | 4.095154000  | 30.341650000 | XXXX 1 | xx | N  | 0.000 |
| H88  | 2.753630000 | 6.977783000  | 30.655248000 | XXXX 1 | xx | H  | 0.000 |
| end  |             |              |              |        |    |    |       |

**$H_{r_i} - NH_2/Pd(110)$  ( $r_i = 0.5$ )**

|     |             |             |              |         |         |              |       |
|-----|-------------|-------------|--------------|---------|---------|--------------|-------|
| PBC | 7.8743      | 8.3520      | 45.3120      | 90.0000 | 90.0000 | 90.0000 (P1) |       |
| Pd1 | 5.905756000 | 1.392028000 | 23.351992000 | XXXX 1  | xx      | Pd           | 0.000 |
| Pd2 | 5.905756000 | 4.176000000 | 23.351992000 | XXXX 1  | xx      | Pd           | 0.000 |
| Pd3 | 5.905756000 | 6.959972000 | 23.351992000 | XXXX 1  | xx      | Pd           | 0.000 |
| Pd4 | 1.968585000 | 1.392028000 | 23.351992000 | XXXX 1  | xx      | Pd           | 0.000 |
| Pd5 | 1.968585000 | 4.176000000 | 23.351992000 | XXXX 1  | xx      | Pd           | 0.000 |

|      |             |             |              |        |    |    |       |
|------|-------------|-------------|--------------|--------|----|----|-------|
| Pd6  | 1.968585000 | 6.959972000 | 23.351992000 | XXXX 1 | xx | Pd | 0.000 |
| Pd7  | 0.000000000 | 2.783972000 | 24.743977000 | XXXX 1 | xx | Pd | 0.000 |
| Pd8  | 0.000000000 | 5.568028000 | 24.743977000 | XXXX 1 | xx | Pd | 0.000 |
| Pd9  | 0.000000000 | 0.000000000 | 24.743977000 | XXXX 1 | xx | Pd | 0.000 |
| Pd10 | 0.000000000 | 0.000000000 | 21.960008000 | XXXX 1 | xx | Pd | 0.000 |
| Pd11 | 0.000000000 | 2.783972000 | 21.960008000 | XXXX 1 | xx | Pd | 0.000 |
| Pd12 | 0.000000000 | 5.568028000 | 21.960008000 | XXXX 1 | xx | Pd | 0.000 |
| Pd13 | 1.968585000 | 1.392028000 | 20.568023000 | XXXX 1 | xx | Pd | 0.000 |
| Pd14 | 1.968585000 | 4.176000000 | 20.568023000 | XXXX 1 | xx | Pd | 0.000 |
| Pd15 | 1.968585000 | 6.959972000 | 20.568023000 | XXXX 1 | xx | Pd | 0.000 |
| Pd16 | 3.937171000 | 0.000000000 | 21.960008000 | XXXX 1 | xx | Pd | 0.000 |
| Pd17 | 3.937171000 | 2.783972000 | 21.960008000 | XXXX 1 | xx | Pd | 0.000 |
| Pd18 | 3.937171000 | 5.568028000 | 21.960008000 | XXXX 1 | xx | Pd | 0.000 |
| Pd19 | 5.905756000 | 1.392028000 | 20.568023000 | XXXX 1 | xx | Pd | 0.000 |
| Pd20 | 5.905756000 | 4.176000000 | 20.568023000 | XXXX 1 | xx | Pd | 0.000 |
| Pd21 | 5.905756000 | 6.959972000 | 20.568023000 | XXXX 1 | xx | Pd | 0.000 |
| Pd22 | 3.937171000 | 0.000000000 | 19.176038000 | XXXX 1 | xx | Pd | 0.000 |
| Pd23 | 3.937171000 | 2.783972000 | 19.176038000 | XXXX 1 | xx | Pd | 0.000 |
| Pd24 | 3.937171000 | 5.568028000 | 19.176038000 | XXXX 1 | xx | Pd | 0.000 |
| Pd25 | 0.030552000 | 0.000585000 | 19.175585000 | XXXX 1 | xx | Pd | 0.000 |
| Pd26 | 0.030552000 | 2.784640000 | 19.175585000 | XXXX 1 | xx | Pd | 0.000 |
| Pd27 | 0.030474000 | 5.568612000 | 19.175585000 | XXXX 1 | xx | Pd | 0.000 |
| Pd28 | 1.984491000 | 1.391777000 | 17.725601000 | XXXX 1 | xx | Pd | 0.000 |
| Pd29 | 1.984413000 | 4.175749000 | 17.725148000 | XXXX 1 | xx | Pd | 0.000 |
| Pd30 | 1.984334000 | 6.959638000 | 17.725148000 | XXXX 1 | xx | Pd | 0.000 |
| Pd31 | 5.921662000 | 1.392362000 | 17.831631000 | XXXX 1 | xx | Pd | 0.000 |
| Pd32 | 5.921426000 | 4.176251000 | 17.831178000 | XXXX 1 | xx | Pd | 0.000 |
| Pd33 | 5.921505000 | 6.960139000 | 17.831178000 | XXXX 1 | xx | Pd | 0.000 |
| Pd34 | 0.040002000 | 8.351749000 | 16.401585000 | XXXX 1 | xx | Pd | 0.000 |
| Pd35 | 0.040159000 | 2.783638000 | 16.401585000 | XXXX 1 | xx | Pd | 0.000 |
| Pd36 | 0.039844000 | 5.567527000 | 16.401132000 | XXXX 1 | xx | Pd | 0.000 |
| Pd37 | 3.928115000 | 2.783388000 | 16.402491000 | XXXX 1 | xx | Pd | 0.000 |
| Pd38 | 3.928036000 | 5.567193000 | 16.402038000 | XXXX 1 | xx | Pd | 0.000 |
| Pd39 | 3.928351000 | 8.351499000 | 16.402944000 | XXXX 1 | xx | Pd | 0.000 |
| Pd40 | 5.920323000 | 1.391026000 | 15.136474000 | XXXX 1 | xx | Pd | 0.000 |
| Pd41 | 5.920087000 | 4.174831000 | 15.136020000 | XXXX 1 | xx | Pd | 0.000 |
| Pd42 | 5.920008000 | 6.958803000 | 15.136020000 | XXXX 1 | xx | Pd | 0.000 |
| H43  | 4.784448000 | 2.783509000 | 14.813653000 | XXXX 1 | xx | H  | 0.000 |
| H44  | 4.784327000 | 5.567528000 | 14.813308000 | XXXX 1 | xx | H  | 0.000 |
| H45  | 4.784472000 | 8.351801000 | 14.814017000 | XXXX 1 | xx | H  | 0.000 |
| H46  | 1.083094000 | 1.397647000 | 16.146732000 | XXXX 1 | xx | H  | 0.000 |
| H47  | 1.082973000 | 4.181726000 | 16.146330000 | XXXX 1 | xx | H  | 0.000 |
| H48  | 1.082856000 | 6.965576000 | 16.146515000 | XXXX 1 | xx | H  | 0.000 |
| H49  | 2.883673000 | 1.392031000 | 16.147297000 | XXXX 1 | xx | H  | 0.000 |
| H50  | 2.883493000 | 4.175967000 | 16.146767000 | XXXX 1 | xx | H  | 0.000 |
| H51  | 2.883790000 | 6.960290000 | 16.147130000 | XXXX 1 | xx | H  | 0.000 |
| H52  | 7.056651000 | 8.350437000 | 14.813892000 | XXXX 1 | xx | H  | 0.000 |
| H53  | 7.056827000 | 2.782554000 | 14.813815000 | XXXX 1 | xx | H  | 0.000 |
| H54  | 7.056528000 | 5.566429000 | 14.813346000 | XXXX 1 | xx | H  | 0.000 |
| Pd55 | 3.925275000 | 0.000583000 | 24.788301000 | XXXX 1 | xx | Pd | 0.000 |
| Pd56 | 3.930306000 | 2.790112000 | 24.798702000 | XXXX 1 | xx | Pd | 0.000 |
| Pd57 | 3.930304000 | 5.563296000 | 24.799603000 | XXXX 1 | xx | Pd | 0.000 |
| Pd58 | 1.754506000 | 4.178137000 | 29.197052000 | XXXX 1 | xx | Pd | 0.000 |
| Pd59 | 1.855692000 | 6.955815000 | 29.125534000 | XXXX 1 | xx | Pd | 0.000 |
| Pd60 | 1.856068000 | 1.397755000 | 29.125185000 | XXXX 1 | xx | Pd | 0.000 |
| Pd61 | 6.097474000 | 1.394656000 | 29.263098000 | XXXX 1 | xx | Pd | 0.000 |
| Pd62 | 6.123257000 | 4.177648000 | 29.225524000 | XXXX 1 | xx | Pd | 0.000 |
| Pd63 | 6.100192000 | 6.961945000 | 29.265858000 | XXXX 1 | xx | Pd | 0.000 |
| Pd64 | 3.918235000 | 0.005904000 | 30.549279000 | XXXX 1 | xx | Pd | 0.000 |
| Pd65 | 3.927958000 | 2.790280000 | 30.551503000 | XXXX 1 | xx | Pd | 0.000 |
| Pd66 | 3.927888000 | 5.570131000 | 30.553126000 | XXXX 1 | xx | Pd | 0.000 |
| Pd67 | 7.867088000 | 2.797858000 | 27.565011000 | XXXX 1 | xx | Pd | 0.000 |
| Pd68 | 7.867424000 | 5.557868000 | 27.567628000 | XXXX 1 | xx | Pd | 0.000 |
| Pd69 | 7.871551000 | 0.001687000 | 27.573563000 | XXXX 1 | xx | Pd | 0.000 |
| Pd70 | 1.973398000 | 1.402262000 | 26.194542000 | XXXX 1 | xx | Pd | 0.000 |
| Pd71 | 1.973162000 | 4.177430000 | 26.207595000 | XXXX 1 | xx | Pd | 0.000 |
| Pd72 | 1.973047000 | 6.952148000 | 26.194780000 | XXXX 1 | xx | Pd | 0.000 |
| Pd73 | 3.882511000 | 0.000635000 | 27.690349000 | XXXX 1 | xx | Pd | 0.000 |
| Pd74 | 3.903113000 | 2.826372000 | 27.727793000 | XXXX 1 | xx | Pd | 0.000 |

|      |             |             |              |        |    |    |       |
|------|-------------|-------------|--------------|--------|----|----|-------|
| Pd75 | 3.902995000 | 5.528517000 | 27.731015000 | XXXX 1 | xx | Pd | 0.000 |
| Pd76 | 5.906997000 | 1.400965000 | 26.164596000 | XXXX 1 | xx | Pd | 0.000 |
| Pd77 | 5.880552000 | 4.177344000 | 26.217658000 | XXXX 1 | xx | Pd | 0.000 |
| Pd78 | 5.906616000 | 6.953099000 | 26.166132000 | XXXX 1 | xx | Pd | 0.000 |
| H79  | 2.737390000 | 1.391015000 | 30.697324000 | XXXX 1 | xx | H  | 0.000 |
| H80  | 2.759253000 | 4.182571000 | 30.702859000 | XXXX 1 | xx | H  | 0.000 |
| H81  | 5.083034000 | 1.382630000 | 30.767007000 | XXXX 1 | xx | H  | 0.000 |
| H82  | 0.040920000 | 6.967304000 | 28.891539000 | XXXX 1 | xx | H  | 0.000 |
| H83  | 5.083797000 | 6.980956000 | 30.768425000 | XXXX 1 | xx | H  | 0.000 |
| H84  | 0.022558000 | 3.313948000 | 30.997350000 | XXXX 1 | xx | H  | 0.000 |
| H85  | 5.098577000 | 4.181967000 | 30.716971000 | XXXX 1 | xx | H  | 0.000 |
| H86  | 0.021621000 | 4.973243000 | 31.034888000 | XXXX 1 | xx | H  | 0.000 |
| H87  | 0.040648000 | 1.387571000 | 28.888217000 | XXXX 1 | xx | H  | 0.000 |
| N88  | 0.013820000 | 4.157484000 | 30.402532000 | XXXX 1 | xx | N  | 0.000 |
| H89  | 5.060679000 | 6.943622000 | 27.746447000 | XXXX 1 | xx | H  | 0.000 |
| H90  | 2.737240000 | 6.972107000 | 30.698850000 | XXXX 1 | xx | H  | 0.000 |
| H91  | 5.059265000 | 1.410625000 | 27.745142000 | XXXX 1 | xx | H  | 0.000 |
| end  |             |             |              |        |    |    |       |

**$H_{r_i} - NH_2/Pd(110)$  ( $r_i = 1$ )**

|      |             |             |              |         |         |              |       |  |
|------|-------------|-------------|--------------|---------|---------|--------------|-------|--|
| PBC  | 7.8743      | 8.3520      | 45.3120      | 90.0000 | 90.0000 | 90.0000 (P1) |       |  |
| Pd1  | 5.905756000 | 1.392028000 | 23.351992000 | XXXX 1  | xx      | Pd           | 0.000 |  |
| Pd2  | 5.905756000 | 4.176000000 | 23.351992000 | XXXX 1  | xx      | Pd           | 0.000 |  |
| Pd3  | 5.905756000 | 6.959972000 | 23.351992000 | XXXX 1  | xx      | Pd           | 0.000 |  |
| Pd4  | 1.968585000 | 1.392028000 | 23.351992000 | XXXX 1  | xx      | Pd           | 0.000 |  |
| Pd5  | 1.968585000 | 4.176000000 | 23.351992000 | XXXX 1  | xx      | Pd           | 0.000 |  |
| Pd6  | 1.968585000 | 6.959972000 | 23.351992000 | XXXX 1  | xx      | Pd           | 0.000 |  |
| Pd7  | 0.000000000 | 2.783972000 | 24.743977000 | XXXX 1  | xx      | Pd           | 0.000 |  |
| Pd8  | 0.000000000 | 5.568028000 | 24.743977000 | XXXX 1  | xx      | Pd           | 0.000 |  |
| Pd9  | 0.000000000 | 0.000000000 | 24.743977000 | XXXX 1  | xx      | Pd           | 0.000 |  |
| Pd10 | 0.000000000 | 0.000000000 | 21.960008000 | XXXX 1  | xx      | Pd           | 0.000 |  |
| Pd11 | 0.000000000 | 2.783972000 | 21.960008000 | XXXX 1  | xx      | Pd           | 0.000 |  |
| Pd12 | 0.000000000 | 5.568028000 | 21.960008000 | XXXX 1  | xx      | Pd           | 0.000 |  |
| Pd13 | 1.968585000 | 1.392028000 | 20.568023000 | XXXX 1  | xx      | Pd           | 0.000 |  |
| Pd14 | 1.968585000 | 4.176000000 | 20.568023000 | XXXX 1  | xx      | Pd           | 0.000 |  |
| Pd15 | 1.968585000 | 6.959972000 | 20.568023000 | XXXX 1  | xx      | Pd           | 0.000 |  |
| Pd16 | 3.937171000 | 0.000000000 | 21.960008000 | XXXX 1  | xx      | Pd           | 0.000 |  |
| Pd17 | 3.937171000 | 2.783972000 | 21.960008000 | XXXX 1  | xx      | Pd           | 0.000 |  |
| Pd18 | 3.937171000 | 5.568028000 | 21.960008000 | XXXX 1  | xx      | Pd           | 0.000 |  |
| Pd19 | 5.905756000 | 1.392028000 | 20.568023000 | XXXX 1  | xx      | Pd           | 0.000 |  |
| Pd20 | 5.905756000 | 4.176000000 | 20.568023000 | XXXX 1  | xx      | Pd           | 0.000 |  |
| Pd21 | 5.905756000 | 6.959972000 | 20.568023000 | XXXX 1  | xx      | Pd           | 0.000 |  |
| Pd22 | 3.937171000 | 0.000000000 | 19.176038000 | XXXX 1  | xx      | Pd           | 0.000 |  |
| Pd23 | 3.937171000 | 2.783972000 | 19.176038000 | XXXX 1  | xx      | Pd           | 0.000 |  |
| Pd24 | 3.937171000 | 5.568028000 | 19.176038000 | XXXX 1  | xx      | Pd           | 0.000 |  |
| Pd25 | 0.030552000 | 0.000585000 | 19.175585000 | XXXX 1  | xx      | Pd           | 0.000 |  |
| Pd26 | 0.030552000 | 2.784640000 | 19.175585000 | XXXX 1  | xx      | Pd           | 0.000 |  |
| Pd27 | 0.030474000 | 5.568612000 | 19.175585000 | XXXX 1  | xx      | Pd           | 0.000 |  |
| Pd28 | 1.984491000 | 1.391777000 | 17.725601000 | XXXX 1  | xx      | Pd           | 0.000 |  |
| Pd29 | 1.984413000 | 4.175749000 | 17.725148000 | XXXX 1  | xx      | Pd           | 0.000 |  |
| Pd30 | 1.984334000 | 6.959638000 | 17.725148000 | XXXX 1  | xx      | Pd           | 0.000 |  |
| Pd31 | 5.921662000 | 1.392362000 | 17.831631000 | XXXX 1  | xx      | Pd           | 0.000 |  |
| Pd32 | 5.921426000 | 4.176251000 | 17.831178000 | XXXX 1  | xx      | Pd           | 0.000 |  |
| Pd33 | 5.921505000 | 6.960139000 | 17.831178000 | XXXX 1  | xx      | Pd           | 0.000 |  |
| Pd34 | 0.040002000 | 8.351749000 | 16.401585000 | XXXX 1  | xx      | Pd           | 0.000 |  |
| Pd35 | 0.040159000 | 2.783638000 | 16.401585000 | XXXX 1  | xx      | Pd           | 0.000 |  |
| Pd36 | 0.039844000 | 5.567527000 | 16.401132000 | XXXX 1  | xx      | Pd           | 0.000 |  |
| Pd37 | 3.928115000 | 2.783388000 | 16.402491000 | XXXX 1  | xx      | Pd           | 0.000 |  |
| Pd38 | 3.928036000 | 5.567193000 | 16.402038000 | XXXX 1  | xx      | Pd           | 0.000 |  |
| Pd39 | 3.928351000 | 8.351499000 | 16.402944000 | XXXX 1  | xx      | Pd           | 0.000 |  |
| Pd40 | 5.920323000 | 1.391026000 | 15.136474000 | XXXX 1  | xx      | Pd           | 0.000 |  |
| Pd41 | 5.920087000 | 4.174831000 | 15.136020000 | XXXX 1  | xx      | Pd           | 0.000 |  |
| Pd42 | 5.920008000 | 6.958803000 | 15.136020000 | XXXX 1  | xx      | Pd           | 0.000 |  |
| H43  | 4.784448000 | 2.783509000 | 14.813653000 | XXXX 1  | xx      | H            | 0.000 |  |
| H44  | 4.784327000 | 5.567528000 | 14.813308000 | XXXX 1  | xx      | H            | 0.000 |  |
| H45  | 4.784472000 | 8.351801000 | 14.814017000 | XXXX 1  | xx      | H            | 0.000 |  |
| H46  | 1.083094000 | 1.397647000 | 16.146732000 | XXXX 1  | xx      | H            | 0.000 |  |
| H47  | 1.082973000 | 4.181726000 | 16.146330000 | XXXX 1  | xx      | H            | 0.000 |  |

|      |             |              |              |        |    |    |       |
|------|-------------|--------------|--------------|--------|----|----|-------|
| H48  | 1.082856000 | 6.965576000  | 16.146515000 | XXXX 1 | xx | H  | 0.000 |
| H49  | 2.883673000 | 1.392031000  | 16.147297000 | XXXX 1 | xx | H  | 0.000 |
| H50  | 2.883493000 | 4.175967000  | 16.146767000 | XXXX 1 | xx | H  | 0.000 |
| H51  | 2.883790000 | 6.960290000  | 16.147130000 | XXXX 1 | xx | H  | 0.000 |
| H52  | 7.056651000 | 8.350437000  | 14.813892000 | XXXX 1 | xx | H  | 0.000 |
| H53  | 7.056827000 | 2.782554000  | 14.813815000 | XXXX 1 | xx | H  | 0.000 |
| H54  | 7.056528000 | 5.566429000  | 14.813346000 | XXXX 1 | xx | H  | 0.000 |
| Pd55 | 4.013665000 | -0.000748000 | 24.885890000 | XXXX 1 | xx | Pd | 0.000 |
| Pd56 | 4.010226000 | 2.785910000  | 24.885896000 | XXXX 1 | xx | Pd | 0.000 |
| Pd57 | 4.005853000 | 5.563042000  | 24.894063000 | XXXX 1 | xx | Pd | 0.000 |
| Pd58 | 3.878718000 | 2.782057000  | 31.086004000 | XXXX 1 | xx | Pd | 0.000 |
| Pd59 | 3.964010000 | 0.003721000  | 28.196204000 | XXXX 1 | xx | Pd | 0.000 |
| Pd60 | 1.721917000 | 6.959017000  | 29.732703000 | XXXX 1 | xx | Pd | 0.000 |
| Pd61 | 5.999116000 | 1.387218000  | 29.662123000 | XXXX 1 | xx | Pd | 0.000 |
| Pd62 | 1.730360000 | 1.388163000  | 29.710149000 | XXXX 1 | xx | Pd | 0.000 |
| Pd63 | 3.889406000 | 8.350391000  | 31.039333000 | XXXX 1 | xx | Pd | 0.000 |
| Pd64 | 6.081637000 | 4.170334000  | 29.771253000 | XXXX 1 | xx | Pd | 0.000 |
| Pd65 | 1.622336000 | 4.167990000  | 29.806434000 | XXXX 1 | xx | Pd | 0.000 |
| Pd66 | 3.876172000 | 5.566568000  | 31.114343000 | XXXX 1 | xx | Pd | 0.000 |
| Pd67 | 7.806326000 | 5.548237000  | 28.053791000 | XXXX 1 | xx | Pd | 0.000 |
| Pd68 | 7.804087000 | 8.347899000  | 28.047043000 | XXXX 1 | xx | Pd | 0.000 |
| Pd69 | 7.798465000 | 2.794522000  | 28.039457000 | XXXX 1 | xx | Pd | 0.000 |
| Pd70 | 1.946106000 | 1.391921000  | 26.508288000 | XXXX 1 | xx | Pd | 0.000 |
| Pd71 | 1.982991000 | 4.173813000  | 26.569754000 | XXXX 1 | xx | Pd | 0.000 |
| Pd72 | 1.961591000 | 6.954287000  | 26.523976000 | XXXX 1 | xx | Pd | 0.000 |
| Pd73 | 3.983524000 | 2.783689000  | 28.248119000 | XXXX 1 | xx | Pd | 0.000 |
| Pd74 | 3.957829000 | 5.554569000  | 28.297548000 | XXXX 1 | xx | Pd | 0.000 |
| Pd75 | 6.006706000 | 6.954931000  | 29.693362000 | XXXX 1 | xx | Pd | 0.000 |
| Pd76 | 5.999428000 | 1.396746000  | 26.426296000 | XXXX 1 | xx | Pd | 0.000 |
| Pd77 | 5.908703000 | 4.174734000  | 26.581864000 | XXXX 1 | xx | Pd | 0.000 |
| Pd78 | 5.905351000 | 6.949699000  | 26.589267000 | XXXX 1 | xx | Pd | 0.000 |
| H79  | 5.052691000 | 6.967123000  | 31.241983000 | XXXX 1 | xx | H  | 0.000 |
| H80  | 4.642990000 | 5.549992000  | 26.614731000 | XXXX 1 | xx | H  | 0.000 |
| H81  | 5.063277000 | 1.383082000  | 31.209219000 | XXXX 1 | xx | H  | 0.000 |
| H82  | 7.791626000 | 6.941475000  | 29.416531000 | XXXX 1 | xx | H  | 0.000 |
| H83  | 2.721561000 | 4.159275000  | 28.353911000 | XXXX 1 | xx | H  | 0.000 |
| H84  | 4.749068000 | 0.066609000  | 26.563077000 | XXXX 1 | xx | H  | 0.000 |
| H85  | 5.041631000 | 4.174225000  | 31.263617000 | XXXX 1 | xx | H  | 0.000 |
| H86  | 2.702447000 | 4.172865000  | 31.267750000 | XXXX 1 | xx | H  | 0.000 |
| H87  | 2.753137000 | 1.387927000  | 28.158016000 | XXXX 1 | xx | H  | 0.000 |
| H88  | 2.727280000 | 1.372315000  | 31.241231000 | XXXX 1 | xx | H  | 0.000 |
| H89  | 4.724657000 | 2.718905000  | 26.583164000 | XXXX 1 | xx | H  | 0.000 |
| H90  | 2.748376000 | 6.979053000  | 28.180609000 | XXXX 1 | xx | H  | 0.000 |
| H91  | 2.726557000 | 6.979336000  | 31.263858000 | XXXX 1 | xx | H  | 0.000 |
| H92  | 6.681240000 | 4.160025000  | 24.972723000 | XXXX 1 | xx | H  | 0.000 |
| H93  | 6.679590000 | 6.977390000  | 24.973220000 | XXXX 1 | xx | H  | 0.000 |
| H94  | 7.791181000 | 1.402999000  | 29.406363000 | XXXX 1 | xx | H  | 0.000 |
| H95  | 2.790730000 | 4.174447000  | 24.920175000 | XXXX 1 | xx | H  | 0.000 |
| H96  | 0.742164000 | 5.537922000  | 26.406023000 | XXXX 1 | xx | H  | 0.000 |
| H97  | 2.817300000 | 6.955600000  | 24.905077000 | XXXX 1 | xx | H  | 0.000 |
| H98  | 0.729722000 | 2.813433000  | 26.388211000 | XXXX 1 | xx | H  | 0.000 |
| H99  | 2.822802000 | 1.394523000  | 24.904217000 | XXXX 1 | xx | H  | 0.000 |
| H100 | 0.719901000 | 8.348192000  | 26.382081000 | XXXX 1 | xx | H  | 0.000 |
| H101 | 7.712108000 | 3.265829000  | 31.616032000 | XXXX 1 | xx | H  | 0.000 |
| H102 | 7.711569000 | 4.919896000  | 31.696989000 | XXXX 1 | xx | H  | 0.000 |
| N103 | 7.764777000 | 4.124515000  | 31.045209000 | XXXX 1 | xx | N  | 0.000 |
| end  |             |              |              |        |    |    |       |

**$H_{r_i} - NH_3/Pd(110)$  ( $r_i = 0.25$ )**

|     |             |             |              |         |         |              |       |
|-----|-------------|-------------|--------------|---------|---------|--------------|-------|
| PBC | 7.8743      | 8.3520      | 45.3120      | 90.0000 | 90.0000 | 90.0000 (P1) |       |
| Pd1 | 5.905756000 | 1.392028000 | 23.351992000 | XXXX 1  | xx      | Pd           | 0.000 |
| Pd2 | 5.905756000 | 4.176000000 | 23.351992000 | XXXX 1  | xx      | Pd           | 0.000 |
| Pd3 | 5.905756000 | 6.959972000 | 23.351992000 | XXXX 1  | xx      | Pd           | 0.000 |
| Pd4 | 1.968585000 | 1.392028000 | 23.351992000 | XXXX 1  | xx      | Pd           | 0.000 |
| Pd5 | 1.968585000 | 4.176000000 | 23.351992000 | XXXX 1  | xx      | Pd           | 0.000 |
| Pd6 | 1.968585000 | 6.959972000 | 23.351992000 | XXXX 1  | xx      | Pd           | 0.000 |
| Pd7 | 0.000000000 | 2.783972000 | 24.743977000 | XXXX 1  | xx      | Pd           | 0.000 |
| Pd8 | 0.000000000 | 5.568028000 | 24.743977000 | XXXX 1  | xx      | Pd           | 0.000 |



|      |              |              |                     |    |    |       |
|------|--------------|--------------|---------------------|----|----|-------|
| Pd9  | 0.00000000   | 0.00000000   | 24.743977000 XXXX 1 | xx | Pd | 0.000 |
| Pd10 | 0.00000000   | 0.00000000   | 21.960008000 XXXX 1 | xx | Pd | 0.000 |
| Pd11 | 0.00000000   | 2.783972000  | 21.960008000 XXXX 1 | xx | Pd | 0.000 |
| Pd12 | 0.00000000   | 5.568028000  | 21.960008000 XXXX 1 | xx | Pd | 0.000 |
| Pd13 | 1.968585000  | 1.392028000  | 20.568023000 XXXX 1 | xx | Pd | 0.000 |
| Pd14 | 1.968585000  | 4.176000000  | 20.568023000 XXXX 1 | xx | Pd | 0.000 |
| Pd15 | 1.968585000  | 6.959972000  | 20.568023000 XXXX 1 | xx | Pd | 0.000 |
| Pd16 | 3.937171000  | 0.000000000  | 21.960008000 XXXX 1 | xx | Pd | 0.000 |
| Pd17 | 3.937171000  | 2.783972000  | 21.960008000 XXXX 1 | xx | Pd | 0.000 |
| Pd18 | 3.937171000  | 5.568028000  | 21.960008000 XXXX 1 | xx | Pd | 0.000 |
| Pd19 | 5.905756000  | 1.392028000  | 20.568023000 XXXX 1 | xx | Pd | 0.000 |
| Pd20 | 5.905756000  | 4.176000000  | 20.568023000 XXXX 1 | xx | Pd | 0.000 |
| Pd21 | 5.905756000  | 6.959972000  | 20.568023000 XXXX 1 | xx | Pd | 0.000 |
| Pd22 | 3.937171000  | 0.000000000  | 19.176038000 XXXX 1 | xx | Pd | 0.000 |
| Pd23 | 3.937171000  | 2.783972000  | 19.176038000 XXXX 1 | xx | Pd | 0.000 |
| Pd24 | 3.937171000  | 5.568028000  | 19.176038000 XXXX 1 | xx | Pd | 0.000 |
| Pd25 | 0.030552000  | 0.000585000  | 19.175585000 XXXX 1 | xx | Pd | 0.000 |
| Pd26 | 0.030552000  | 2.784640000  | 19.175585000 XXXX 1 | xx | Pd | 0.000 |
| Pd27 | 0.030474000  | 5.568612000  | 19.175585000 XXXX 1 | xx | Pd | 0.000 |
| Pd28 | 1.984491000  | 1.391777000  | 17.725601000 XXXX 1 | xx | Pd | 0.000 |
| Pd29 | 1.984413000  | 4.175749000  | 17.725148000 XXXX 1 | xx | Pd | 0.000 |
| Pd30 | 1.984334000  | 6.959638000  | 17.725148000 XXXX 1 | xx | Pd | 0.000 |
| Pd31 | 5.921662000  | 1.392362000  | 17.831631000 XXXX 1 | xx | Pd | 0.000 |
| Pd32 | 5.921426000  | 4.176251000  | 17.831178000 XXXX 1 | xx | Pd | 0.000 |
| Pd33 | 5.921505000  | 6.960139000  | 17.831178000 XXXX 1 | xx | Pd | 0.000 |
| Pd34 | 0.040002000  | 8.351749000  | 16.401585000 XXXX 1 | xx | Pd | 0.000 |
| Pd35 | 0.040159000  | 2.783638000  | 16.401585000 XXXX 1 | xx | Pd | 0.000 |
| Pd36 | 0.039844000  | 5.567527000  | 16.401132000 XXXX 1 | xx | Pd | 0.000 |
| Pd37 | 3.928115000  | 2.783388000  | 16.402491000 XXXX 1 | xx | Pd | 0.000 |
| Pd38 | 3.928036000  | 5.567193000  | 16.402038000 XXXX 1 | xx | Pd | 0.000 |
| Pd39 | 3.928351000  | 8.351499000  | 16.402944000 XXXX 1 | xx | Pd | 0.000 |
| Pd40 | 5.920323000  | 1.391026000  | 15.136474000 XXXX 1 | xx | Pd | 0.000 |
| Pd41 | 5.920087000  | 4.174831000  | 15.136020000 XXXX 1 | xx | Pd | 0.000 |
| Pd42 | 5.920008000  | 6.958803000  | 15.136020000 XXXX 1 | xx | Pd | 0.000 |
| H43  | 4.784448000  | 2.783509000  | 14.813653000 XXXX 1 | xx | H  | 0.000 |
| H44  | 4.784327000  | 5.567528000  | 14.813308000 XXXX 1 | xx | H  | 0.000 |
| H45  | 4.784472000  | 8.351801000  | 14.814017000 XXXX 1 | xx | H  | 0.000 |
| H46  | 1.083094000  | 1.397647000  | 16.146732000 XXXX 1 | xx | H  | 0.000 |
| H47  | 1.082973000  | 4.181726000  | 16.146330000 XXXX 1 | xx | H  | 0.000 |
| H48  | 1.082856000  | 6.965576000  | 16.146515000 XXXX 1 | xx | H  | 0.000 |
| H49  | 2.883673000  | 1.392031000  | 16.147297000 XXXX 1 | xx | H  | 0.000 |
| H50  | 2.883493000  | 4.175967000  | 16.146767000 XXXX 1 | xx | H  | 0.000 |
| H51  | 2.883790000  | 6.960290000  | 16.147130000 XXXX 1 | xx | H  | 0.000 |
| H52  | 7.056651000  | 8.350437000  | 14.813892000 XXXX 1 | xx | H  | 0.000 |
| H53  | 7.056827000  | 2.782554000  | 14.813815000 XXXX 1 | xx | H  | 0.000 |
| H54  | 7.056528000  | 5.566429000  | 14.813346000 XXXX 1 | xx | H  | 0.000 |
| Pd55 | 3.940356000  | -0.000203000 | 24.803970000 XXXX 1 | xx | Pd | 0.000 |
| Pd56 | 3.939185000  | 2.782493000  | 24.803717000 XXXX 1 | xx | Pd | 0.000 |
| Pd57 | 3.941989000  | 5.567510000  | 24.803341000 XXXX 1 | xx | Pd | 0.000 |
| Pd58 | 1.886805000  | 6.958514000  | 29.084376000 XXXX 1 | xx | Pd | 0.000 |
| Pd59 | 3.937575000  | 0.001271000  | 27.670955000 XXXX 1 | xx | Pd | 0.000 |
| Pd60 | 6.012429000  | 4.171339000  | 29.106757000 XXXX 1 | xx | Pd | 0.000 |
| Pd61 | 5.984080000  | 1.390546000  | 29.085399000 XXXX 1 | xx | Pd | 0.000 |
| Pd62 | 6.012243000  | 6.962824000  | 29.110490000 XXXX 1 | xx | Pd | 0.000 |
| Pd63 | 3.884895000  | 5.564282000  | 30.472928000 XXXX 1 | xx | Pd | 0.000 |
| Pd64 | 3.945216000  | 5.567859000  | 27.692877000 XXXX 1 | xx | Pd | 0.000 |
| Pd65 | 0.002831000  | 5.567377000  | 27.645727000 XXXX 1 | xx | Pd | 0.000 |
| Pd66 | 3.936234000  | 2.780231000  | 27.665007000 XXXX 1 | xx | Pd | 0.000 |
| Pd67 | -0.000652000 | 2.779833000  | 27.637509000 XXXX 1 | xx | Pd | 0.000 |
| Pd68 | 1.887862000  | 4.174902000  | 29.081230000 XXXX 1 | xx | Pd | 0.000 |
| Pd69 | 7.873338000  | 0.002444000  | 27.638973000 XXXX 1 | xx | Pd | 0.000 |
| Pd70 | 1.971444000  | 4.177725000  | 26.218848000 XXXX 1 | xx | Pd | 0.000 |
| Pd71 | 1.971282000  | 6.958313000  | 26.220221000 XXXX 1 | xx | Pd | 0.000 |
| Pd72 | 1.968444000  | 1.391294000  | 26.215471000 XXXX 1 | xx | Pd | 0.000 |
| Pd73 | 3.943801000  | 8.354151000  | 30.448469000 XXXX 1 | xx | Pd | 0.000 |
| Pd74 | 1.861422000  | 1.390968000  | 29.109666000 XXXX 1 | xx | Pd | 0.000 |
| Pd75 | 3.945957000  | 2.776425000  | 30.445038000 XXXX 1 | xx | Pd | 0.000 |
| Pd76 | 5.906386000  | 6.957599000  | 26.223820000 XXXX 1 | xx | Pd | 0.000 |
| Pd77 | 5.915040000  | 1.391415000  | 26.214696000 XXXX 1 | xx | Pd | 0.000 |

|      |             |             |              |        |    |    |       |
|------|-------------|-------------|--------------|--------|----|----|-------|
| Pd78 | 5.906004000 | 4.178044000 | 26.222978000 | XXXX 1 | xx | Pd | 0.000 |
| N79  | 2.943769000 | 5.520875000 | 32.434981000 | XXXX 1 | xx | N  | 0.000 |
| H80  | 5.111231000 | 6.981639000 | 30.649265000 | XXXX 1 | xx | H  | 0.000 |
| H81  | 2.185924000 | 4.828379000 | 32.459442000 | XXXX 1 | xx | H  | 0.000 |
| H82  | 5.114284000 | 4.148731000 | 30.643573000 | XXXX 1 | xx | H  | 0.000 |
| H83  | 2.552733000 | 6.440795000 | 32.672359000 | XXXX 1 | xx | H  | 0.000 |
| H84  | 3.645463000 | 5.267452000 | 33.139739000 | XXXX 1 | xx | H  | 0.000 |
| H85  | 2.752595000 | 1.390707000 | 30.676628000 | XXXX 1 | xx | H  | 0.000 |
| end  |             |             |              |        |    |    |       |

**$H_{r_i} - NH_3/Pd(110)$  ( $r_i = 0.375$ )**

|      |             |              |              |         |         |              |       |  |
|------|-------------|--------------|--------------|---------|---------|--------------|-------|--|
| PBC  | 7.8743      | 8.3520       | 45.3120      | 90.0000 | 90.0000 | 90.0000 (P1) |       |  |
| Pd1  | 5.905756000 | 1.392028000  | 23.351992000 | XXXX 1  | xx      | Pd           | 0.000 |  |
| Pd2  | 5.905756000 | 4.176000000  | 23.351992000 | XXXX 1  | xx      | Pd           | 0.000 |  |
| Pd3  | 5.905756000 | 6.959972000  | 23.351992000 | XXXX 1  | xx      | Pd           | 0.000 |  |
| Pd4  | 1.968585000 | 1.392028000  | 23.351992000 | XXXX 1  | xx      | Pd           | 0.000 |  |
| Pd5  | 1.968585000 | 4.176000000  | 23.351992000 | XXXX 1  | xx      | Pd           | 0.000 |  |
| Pd6  | 1.968585000 | 6.959972000  | 23.351992000 | XXXX 1  | xx      | Pd           | 0.000 |  |
| Pd7  | 0.000000000 | 2.783972000  | 24.743977000 | XXXX 1  | xx      | Pd           | 0.000 |  |
| Pd8  | 0.000000000 | 5.568028000  | 24.743977000 | XXXX 1  | xx      | Pd           | 0.000 |  |
| Pd9  | 0.000000000 | 0.000000000  | 24.743977000 | XXXX 1  | xx      | Pd           | 0.000 |  |
| Pd10 | 0.000000000 | 0.000000000  | 21.960008000 | XXXX 1  | xx      | Pd           | 0.000 |  |
| Pd11 | 0.000000000 | 2.783972000  | 21.960008000 | XXXX 1  | xx      | Pd           | 0.000 |  |
| Pd12 | 0.000000000 | 5.568028000  | 21.960008000 | XXXX 1  | xx      | Pd           | 0.000 |  |
| Pd13 | 1.968585000 | 1.392028000  | 20.568023000 | XXXX 1  | xx      | Pd           | 0.000 |  |
| Pd14 | 1.968585000 | 4.176000000  | 20.568023000 | XXXX 1  | xx      | Pd           | 0.000 |  |
| Pd15 | 1.968585000 | 6.959972000  | 20.568023000 | XXXX 1  | xx      | Pd           | 0.000 |  |
| Pd16 | 3.937171000 | 0.000000000  | 21.960008000 | XXXX 1  | xx      | Pd           | 0.000 |  |
| Pd17 | 3.937171000 | 2.783972000  | 21.960008000 | XXXX 1  | xx      | Pd           | 0.000 |  |
| Pd18 | 3.937171000 | 5.568028000  | 21.960008000 | XXXX 1  | xx      | Pd           | 0.000 |  |
| Pd19 | 5.905756000 | 1.392028000  | 20.568023000 | XXXX 1  | xx      | Pd           | 0.000 |  |
| Pd20 | 5.905756000 | 4.176000000  | 20.568023000 | XXXX 1  | xx      | Pd           | 0.000 |  |
| Pd21 | 5.905756000 | 6.959972000  | 20.568023000 | XXXX 1  | xx      | Pd           | 0.000 |  |
| Pd22 | 3.937171000 | 0.000000000  | 19.176038000 | XXXX 1  | xx      | Pd           | 0.000 |  |
| Pd23 | 3.937171000 | 2.783972000  | 19.176038000 | XXXX 1  | xx      | Pd           | 0.000 |  |
| Pd24 | 3.937171000 | 5.568028000  | 19.176038000 | XXXX 1  | xx      | Pd           | 0.000 |  |
| Pd25 | 0.030552000 | 0.000585000  | 19.175585000 | XXXX 1  | xx      | Pd           | 0.000 |  |
| Pd26 | 0.030552000 | 2.784640000  | 19.175585000 | XXXX 1  | xx      | Pd           | 0.000 |  |
| Pd27 | 0.030474000 | 5.568612000  | 19.175585000 | XXXX 1  | xx      | Pd           | 0.000 |  |
| Pd28 | 1.984491000 | 1.391777000  | 17.725601000 | XXXX 1  | xx      | Pd           | 0.000 |  |
| Pd29 | 1.984413000 | 4.175749000  | 17.725148000 | XXXX 1  | xx      | Pd           | 0.000 |  |
| Pd30 | 1.984334000 | 6.959638000  | 17.725148000 | XXXX 1  | xx      | Pd           | 0.000 |  |
| Pd31 | 5.921662000 | 1.392362000  | 17.831631000 | XXXX 1  | xx      | Pd           | 0.000 |  |
| Pd32 | 5.921426000 | 4.176251000  | 17.831178000 | XXXX 1  | xx      | Pd           | 0.000 |  |
| Pd33 | 5.921505000 | 6.960139000  | 17.831178000 | XXXX 1  | xx      | Pd           | 0.000 |  |
| Pd34 | 0.040002000 | 8.351749000  | 16.401585000 | XXXX 1  | xx      | Pd           | 0.000 |  |
| Pd35 | 0.040159000 | 2.783638000  | 16.401585000 | XXXX 1  | xx      | Pd           | 0.000 |  |
| Pd36 | 0.039844000 | 5.567527000  | 16.401132000 | XXXX 1  | xx      | Pd           | 0.000 |  |
| Pd37 | 3.928115000 | 2.783388000  | 16.402491000 | XXXX 1  | xx      | Pd           | 0.000 |  |
| Pd38 | 3.928036000 | 5.567193000  | 16.402038000 | XXXX 1  | xx      | Pd           | 0.000 |  |
| Pd39 | 3.928351000 | 8.351499000  | 16.402944000 | XXXX 1  | xx      | Pd           | 0.000 |  |
| Pd40 | 5.920323000 | 1.391026000  | 15.136474000 | XXXX 1  | xx      | Pd           | 0.000 |  |
| Pd41 | 5.920087000 | 4.174831000  | 15.136020000 | XXXX 1  | xx      | Pd           | 0.000 |  |
| Pd42 | 5.920008000 | 6.958803000  | 15.136020000 | XXXX 1  | xx      | Pd           | 0.000 |  |
| H43  | 4.784448000 | 2.783509000  | 14.813653000 | XXXX 1  | xx      | H            | 0.000 |  |
| H44  | 4.784327000 | 5.567528000  | 14.813308000 | XXXX 1  | xx      | H            | 0.000 |  |
| H45  | 4.784472000 | 8.351801000  | 14.814017000 | XXXX 1  | xx      | H            | 0.000 |  |
| H46  | 1.083094000 | 1.397647000  | 16.146732000 | XXXX 1  | xx      | H            | 0.000 |  |
| H47  | 1.082973000 | 4.181726000  | 16.146330000 | XXXX 1  | xx      | H            | 0.000 |  |
| H48  | 1.082856000 | 6.965576000  | 16.146515000 | XXXX 1  | xx      | H            | 0.000 |  |
| H49  | 2.883673000 | 1.392031000  | 16.147297000 | XXXX 1  | xx      | H            | 0.000 |  |
| H50  | 2.883493000 | 4.175967000  | 16.146767000 | XXXX 1  | xx      | H            | 0.000 |  |
| H51  | 2.883790000 | 6.960290000  | 16.147130000 | XXXX 1  | xx      | H            | 0.000 |  |
| H52  | 7.056651000 | 8.350437000  | 14.813892000 | XXXX 1  | xx      | H            | 0.000 |  |
| H53  | 7.056827000 | 2.782554000  | 14.813815000 | XXXX 1  | xx      | H            | 0.000 |  |
| H54  | 7.056528000 | 5.566429000  | 14.813346000 | XXXX 1  | xx      | H            | 0.000 |  |
| Pd55 | 3.940681000 | -0.002803000 | 24.798001000 | XXXX 1  | xx      | Pd           | 0.000 |  |
| Pd56 | 3.940628000 | 2.787012000  | 24.797325000 | XXXX 1  | xx      | Pd           | 0.000 |  |

|      |              |              |              |        |    |    |       |
|------|--------------|--------------|--------------|--------|----|----|-------|
| Pd57 | 3.937448000  | 5.568417000  | 24.803061000 | XXXX 1 | xx | Pd | 0.000 |
| Pd58 | 2.083041000  | 1.392103000  | 29.085849000 | XXXX 1 | xx | Pd | 0.000 |
| Pd59 | 2.084261000  | 4.173355000  | 29.107602000 | XXXX 1 | xx | Pd | 0.000 |
| Pd60 | 2.083627000  | 6.963116000  | 29.111180000 | XXXX 1 | xx | Pd | 0.000 |
| Pd61 | 7.883358000  | 0.007180000  | 30.499008000 | XXXX 1 | xx | Pd | 0.000 |
| Pd62 | 7.883365000  | 2.777059000  | 30.494496000 | XXXX 1 | xx | Pd | 0.000 |
| Pd63 | 7.880071000  | 5.567545000  | 30.657295000 | XXXX 1 | xx | Pd | 0.000 |
| Pd64 | 5.794232000  | 1.392531000  | 29.091218000 | XXXX 1 | xx | Pd | 0.000 |
| Pd65 | 5.797972000  | 4.168266000  | 29.109017000 | XXXX 1 | xx | Pd | 0.000 |
| Pd66 | 5.799434000  | 6.969635000  | 29.112971000 | XXXX 1 | xx | Pd | 0.000 |
| Pd67 | 7.877311000  | 0.001326000  | 27.670237000 | XXXX 1 | xx | Pd | 0.000 |
| Pd68 | 7.877011000  | 2.784571000  | 27.667884000 | XXXX 1 | xx | Pd | 0.000 |
| Pd69 | 7.877719000  | 5.568928000  | 27.759167000 | XXXX 1 | xx | Pd | 0.000 |
| Pd70 | 1.942830000  | 1.392531000  | 26.201827000 | XXXX 1 | xx | Pd | 0.000 |
| Pd71 | 1.929825000  | 4.180226000  | 26.219417000 | XXXX 1 | xx | Pd | 0.000 |
| Pd72 | 1.929578000  | 6.957323000  | 26.220727000 | XXXX 1 | xx | Pd | 0.000 |
| Pd73 | 3.933806000  | 8.352149000  | 27.616197000 | XXXX 1 | xx | Pd | 0.000 |
| Pd74 | 3.933771000  | 2.784583000  | 27.614524000 | XXXX 1 | xx | Pd | 0.000 |
| Pd75 | 3.926580000  | 5.569269000  | 27.627409000 | XXXX 1 | xx | Pd | 0.000 |
| Pd76 | 5.933904000  | 1.392182000  | 26.210551000 | XXXX 1 | xx | Pd | 0.000 |
| Pd77 | 5.941154000  | 4.181998000  | 26.225999000 | XXXX 1 | xx | Pd | 0.000 |
| Pd78 | 5.941451000  | 6.954964000  | 26.227695000 | XXXX 1 | xx | Pd | 0.000 |
| N79  | -0.078514000 | -2.818185000 | 32.901313000 | XXXX 1 | xx | N  | 0.000 |
| H80  | 1.216257000  | 4.152853000  | 30.653804000 | XXXX 1 | xx | H  | 0.000 |
| H81  | 8.725506000  | 5.362769000  | 33.298453000 | XXXX 1 | xx | H  | 0.000 |
| H82  | 6.676532000  | 6.993154000  | 30.661912000 | XXXX 1 | xx | H  | 0.000 |
| H83  | 6.667007000  | 1.392988000  | 30.661008000 | XXXX 1 | xx | H  | 0.000 |
| H84  | 7.167194000  | 4.789043000  | 33.218297000 | XXXX 1 | xx | H  | 0.000 |
| H85  | -0.426858000 | 6.426006000  | 33.263770000 | XXXX 1 | xx | H  | 0.000 |
| H86  | 1.215798000  | 6.983715000  | 30.661218000 | XXXX 1 | xx | H  | 0.000 |
| H87  | 6.676241000  | 4.142850000  | 30.652302000 | XXXX 1 | xx | H  | 0.000 |
| H88  | 1.227242000  | 1.393145000  | 30.662176000 | XXXX 1 | xx | H  | 0.000 |
| end  |              |              |              |        |    |    |       |

**$H_{r_i}$ -NH<sub>3</sub>/Pd(110) ( $r_i = 0.5$ )**

| PBC  | 7.8743      | 8.3520      | 45.3120      | 90.0000 | 90.0000 | 90.0000 (P1) |       |  |
|------|-------------|-------------|--------------|---------|---------|--------------|-------|--|
| Pd1  | 5.905756000 | 1.392028000 | 23.351992000 | XXXX 1  | xx      | Pd           | 0.000 |  |
| Pd2  | 5.905756000 | 4.176000000 | 23.351992000 | XXXX 1  | xx      | Pd           | 0.000 |  |
| Pd3  | 5.905756000 | 6.959972000 | 23.351992000 | XXXX 1  | xx      | Pd           | 0.000 |  |
| Pd4  | 1.968585000 | 1.392028000 | 23.351992000 | XXXX 1  | xx      | Pd           | 0.000 |  |
| Pd5  | 1.968585000 | 4.176000000 | 23.351992000 | XXXX 1  | xx      | Pd           | 0.000 |  |
| Pd6  | 1.968585000 | 6.959972000 | 23.351992000 | XXXX 1  | xx      | Pd           | 0.000 |  |
| Pd7  | 0.000000000 | 2.783972000 | 24.743977000 | XXXX 1  | xx      | Pd           | 0.000 |  |
| Pd8  | 0.000000000 | 5.568028000 | 24.743977000 | XXXX 1  | xx      | Pd           | 0.000 |  |
| Pd9  | 0.000000000 | 0.000000000 | 24.743977000 | XXXX 1  | xx      | Pd           | 0.000 |  |
| Pd10 | 0.000000000 | 0.000000000 | 21.960008000 | XXXX 1  | xx      | Pd           | 0.000 |  |
| Pd11 | 0.000000000 | 2.783972000 | 21.960008000 | XXXX 1  | xx      | Pd           | 0.000 |  |
| Pd12 | 0.000000000 | 5.568028000 | 21.960008000 | XXXX 1  | xx      | Pd           | 0.000 |  |
| Pd13 | 1.968585000 | 1.392028000 | 20.568023000 | XXXX 1  | xx      | Pd           | 0.000 |  |
| Pd14 | 1.968585000 | 4.176000000 | 20.568023000 | XXXX 1  | xx      | Pd           | 0.000 |  |
| Pd15 | 1.968585000 | 6.959972000 | 20.568023000 | XXXX 1  | xx      | Pd           | 0.000 |  |
| Pd16 | 3.937171000 | 0.000000000 | 21.960008000 | XXXX 1  | xx      | Pd           | 0.000 |  |
| Pd17 | 3.937171000 | 2.783972000 | 21.960008000 | XXXX 1  | xx      | Pd           | 0.000 |  |
| Pd18 | 3.937171000 | 5.568028000 | 21.960008000 | XXXX 1  | xx      | Pd           | 0.000 |  |
| Pd19 | 5.905756000 | 1.392028000 | 20.568023000 | XXXX 1  | xx      | Pd           | 0.000 |  |
| Pd20 | 5.905756000 | 4.176000000 | 20.568023000 | XXXX 1  | xx      | Pd           | 0.000 |  |
| Pd21 | 5.905756000 | 6.959972000 | 20.568023000 | XXXX 1  | xx      | Pd           | 0.000 |  |
| Pd22 | 3.937171000 | 0.000000000 | 19.176038000 | XXXX 1  | xx      | Pd           | 0.000 |  |
| Pd23 | 3.937171000 | 2.783972000 | 19.176038000 | XXXX 1  | xx      | Pd           | 0.000 |  |
| Pd24 | 3.937171000 | 5.568028000 | 19.176038000 | XXXX 1  | xx      | Pd           | 0.000 |  |
| Pd25 | 0.030552000 | 0.000585000 | 19.175585000 | XXXX 1  | xx      | Pd           | 0.000 |  |
| Pd26 | 0.030552000 | 2.784640000 | 19.175585000 | XXXX 1  | xx      | Pd           | 0.000 |  |
| Pd27 | 0.030474000 | 5.568612000 | 19.175585000 | XXXX 1  | xx      | Pd           | 0.000 |  |
| Pd28 | 1.984491000 | 1.391777000 | 17.725601000 | XXXX 1  | xx      | Pd           | 0.000 |  |
| Pd29 | 1.984413000 | 4.175749000 | 17.725148000 | XXXX 1  | xx      | Pd           | 0.000 |  |
| Pd30 | 1.984334000 | 6.959638000 | 17.725148000 | XXXX 1  | xx      | Pd           | 0.000 |  |
| Pd31 | 5.921662000 | 1.392362000 | 17.831631000 | XXXX 1  | xx      | Pd           | 0.000 |  |
| Pd32 | 5.921426000 | 4.176251000 | 17.831178000 | XXXX 1  | xx      | Pd           | 0.000 |  |

|      |              |              |              |        |    |    |       |
|------|--------------|--------------|--------------|--------|----|----|-------|
| Pd33 | 5.921505000  | 6.960139000  | 17.831178000 | XXXX 1 | xx | Pd | 0.000 |
| Pd34 | 0.040002000  | 8.351749000  | 16.401585000 | XXXX 1 | xx | Pd | 0.000 |
| Pd35 | 0.040159000  | 2.783638000  | 16.401585000 | XXXX 1 | xx | Pd | 0.000 |
| Pd36 | 0.039844000  | 5.567527000  | 16.401132000 | XXXX 1 | xx | Pd | 0.000 |
| Pd37 | 3.928115000  | 2.783388000  | 16.402491000 | XXXX 1 | xx | Pd | 0.000 |
| Pd38 | 3.928036000  | 5.567193000  | 16.402038000 | XXXX 1 | xx | Pd | 0.000 |
| Pd39 | 3.928351000  | 8.351499000  | 16.402944000 | XXXX 1 | xx | Pd | 0.000 |
| Pd40 | 5.920323000  | 1.391026000  | 15.136474000 | XXXX 1 | xx | Pd | 0.000 |
| Pd41 | 5.920087000  | 4.174831000  | 15.136020000 | XXXX 1 | xx | Pd | 0.000 |
| Pd42 | 5.920008000  | 6.958803000  | 15.136020000 | XXXX 1 | xx | Pd | 0.000 |
| H43  | 4.784448000  | 2.783509000  | 14.813653000 | XXXX 1 | xx | H  | 0.000 |
| H44  | 4.784327000  | 5.567528000  | 14.813308000 | XXXX 1 | xx | H  | 0.000 |
| H45  | 4.784472000  | 8.351801000  | 14.814017000 | XXXX 1 | xx | H  | 0.000 |
| H46  | 1.083094000  | 1.397647000  | 16.146732000 | XXXX 1 | xx | H  | 0.000 |
| H47  | 1.082973000  | 4.181726000  | 16.146330000 | XXXX 1 | xx | H  | 0.000 |
| H48  | 1.082856000  | 6.965576000  | 16.146515000 | XXXX 1 | xx | H  | 0.000 |
| H49  | 2.883673000  | 1.392031000  | 16.147297000 | XXXX 1 | xx | H  | 0.000 |
| H50  | 2.883493000  | 4.175967000  | 16.146767000 | XXXX 1 | xx | H  | 0.000 |
| H51  | 2.883790000  | 6.960290000  | 16.147130000 | XXXX 1 | xx | H  | 0.000 |
| H52  | 7.056651000  | 8.350437000  | 14.813892000 | XXXX 1 | xx | H  | 0.000 |
| H53  | 7.056827000  | 2.782554000  | 14.813815000 | XXXX 1 | xx | H  | 0.000 |
| H54  | 7.056528000  | 5.566429000  | 14.813346000 | XXXX 1 | xx | H  | 0.000 |
| Pd55 | 3.936344000  | 0.001619000  | 24.795915000 | XXXX 1 | xx | Pd | 0.000 |
| Pd56 | 3.943977000  | 2.783661000  | 24.801796000 | XXXX 1 | xx | Pd | 0.000 |
| Pd57 | 3.937328000  | 5.566396000  | 24.796095000 | XXXX 1 | xx | Pd | 0.000 |
| Pd58 | 2.062194000  | 6.957474000  | 29.100426000 | XXXX 1 | xx | Pd | 0.000 |
| Pd59 | 2.053214000  | 1.368092000  | 29.113929000 | XXXX 1 | xx | Pd | 0.000 |
| Pd60 | 2.054382000  | 4.194818000  | 29.110215000 | XXXX 1 | xx | Pd | 0.000 |
| Pd61 | 0.014440000  | -0.009039000 | 30.551058000 | XXXX 1 | xx | Pd | 0.000 |
| Pd62 | 0.020992000  | 2.781763000  | 30.685087000 | XXXX 1 | xx | Pd | 0.000 |
| Pd63 | 0.013835000  | 5.570069000  | 30.545591000 | XXXX 1 | xx | Pd | 0.000 |
| Pd64 | 5.831795000  | 1.404522000  | 29.139331000 | XXXX 1 | xx | Pd | 0.000 |
| Pd65 | 5.830876000  | 4.157536000  | 29.137006000 | XXXX 1 | xx | Pd | 0.000 |
| Pd66 | 5.833597000  | 6.957358000  | 29.132097000 | XXXX 1 | xx | Pd | 0.000 |
| Pd67 | 7.874457000  | 0.000058000  | 27.681584000 | XXXX 1 | xx | Pd | 0.000 |
| Pd68 | 7.882691000  | 2.782378000  | 27.749224000 | XXXX 1 | xx | Pd | 0.000 |
| Pd69 | 7.873240000  | 5.566759000  | 27.678558000 | XXXX 1 | xx | Pd | 0.000 |
| Pd70 | 1.935950000  | 1.398532000  | 26.211412000 | XXXX 1 | xx | Pd | 0.000 |
| Pd71 | 1.935936000  | 4.167514000  | 26.210259000 | XXXX 1 | xx | Pd | 0.000 |
| Pd72 | 1.930014000  | 6.959307000  | 26.206874000 | XXXX 1 | xx | Pd | 0.000 |
| Pd73 | 3.918692000  | -0.002005000 | 27.600296000 | XXXX 1 | xx | Pd | 0.000 |
| Pd74 | 3.963484000  | 2.781984000  | 27.612275000 | XXXX 1 | xx | Pd | 0.000 |
| Pd75 | 3.919843000  | 5.567550000  | 27.598210000 | XXXX 1 | xx | Pd | 0.000 |
| Pd76 | 5.949083000  | 1.393279000  | 26.223773000 | XXXX 1 | xx | Pd | 0.000 |
| Pd77 | 5.948740000  | 4.176647000  | 26.222788000 | XXXX 1 | xx | Pd | 0.000 |
| Pd78 | 5.933044000  | 6.963738000  | 26.202250000 | XXXX 1 | xx | Pd | 0.000 |
| N79  | 0.249247000  | 2.815329000  | 32.918031000 | XXXX 1 | xx | N  | 0.000 |
| H80  | 3.191881000  | 2.779821000  | 29.233383000 | XXXX 1 | xx | H  | 0.000 |
| H81  | 1.218873000  | 6.955161000  | 30.693104000 | XXXX 1 | xx | H  | 0.000 |
| H82  | 6.690377000  | 4.192437000  | 30.704824000 | XXXX 1 | xx | H  | 0.000 |
| H83  | 0.727104000  | 3.672417000  | 33.217586000 | XXXX 1 | xx | H  | 0.000 |
| H84  | 4.665513000  | 5.542576000  | 29.227033000 | XXXX 1 | xx | H  | 0.000 |
| H85  | 4.665771000  | 0.018458000  | 29.228578000 | XXXX 1 | xx | H  | 0.000 |
| H86  | 0.801022000  | 2.012299000  | 33.233909000 | XXXX 1 | xx | H  | 0.000 |
| H87  | -0.667581000 | 2.780172000  | 33.374612000 | XXXX 1 | xx | H  | 0.000 |
| H88  | 1.212064000  | 4.196881000  | 30.668055000 | XXXX 1 | xx | H  | 0.000 |
| H89  | 6.700571000  | 6.956018000  | 30.727618000 | XXXX 1 | xx | H  | 0.000 |
| H90  | 1.210722000  | 1.363215000  | 30.675732000 | XXXX 1 | xx | H  | 0.000 |
| H91  | 6.691852000  | 1.366360000  | 30.708915000 | XXXX 1 | xx | H  | 0.000 |
| end  |              |              |              |        |    |    |       |

**$H_{r_i} - NH_3/Pd(110)$  ( $r_i = 1$ )**

|     |             |             |              |         |         |              |       |
|-----|-------------|-------------|--------------|---------|---------|--------------|-------|
| PBC | 7.8743      | 8.3520      | 45.3120      | 90.0000 | 90.0000 | 90.0000 (P1) |       |
| Pd1 | 5.905756000 | 1.392028000 | 23.351992000 | XXXX 1  | xx      | Pd           | 0.000 |
| Pd2 | 5.905756000 | 4.176000000 | 23.351992000 | XXXX 1  | xx      | Pd           | 0.000 |
| Pd3 | 5.905756000 | 6.959972000 | 23.351992000 | XXXX 1  | xx      | Pd           | 0.000 |
| Pd4 | 1.968585000 | 1.392028000 | 23.351992000 | XXXX 1  | xx      | Pd           | 0.000 |
| Pd5 | 1.968585000 | 4.176000000 | 23.351992000 | XXXX 1  | xx      | Pd           | 0.000 |

|      |             |             |              |        |    |    |       |
|------|-------------|-------------|--------------|--------|----|----|-------|
| Pd6  | 1.968585000 | 6.959972000 | 23.351992000 | XXXX 1 | xx | Pd | 0.000 |
| Pd7  | 0.000000000 | 2.783972000 | 24.743977000 | XXXX 1 | xx | Pd | 0.000 |
| Pd8  | 0.000000000 | 5.568028000 | 24.743977000 | XXXX 1 | xx | Pd | 0.000 |
| Pd9  | 0.000000000 | 0.000000000 | 24.743977000 | XXXX 1 | xx | Pd | 0.000 |
| Pd10 | 0.000000000 | 0.000000000 | 21.960008000 | XXXX 1 | xx | Pd | 0.000 |
| Pd11 | 0.000000000 | 2.783972000 | 21.960008000 | XXXX 1 | xx | Pd | 0.000 |
| Pd12 | 0.000000000 | 5.568028000 | 21.960008000 | XXXX 1 | xx | Pd | 0.000 |
| Pd13 | 1.968585000 | 1.392028000 | 20.568023000 | XXXX 1 | xx | Pd | 0.000 |
| Pd14 | 1.968585000 | 4.176000000 | 20.568023000 | XXXX 1 | xx | Pd | 0.000 |
| Pd15 | 1.968585000 | 6.959972000 | 20.568023000 | XXXX 1 | xx | Pd | 0.000 |
| Pd16 | 3.937171000 | 0.000000000 | 21.960008000 | XXXX 1 | xx | Pd | 0.000 |
| Pd17 | 3.937171000 | 2.783972000 | 21.960008000 | XXXX 1 | xx | Pd | 0.000 |
| Pd18 | 3.937171000 | 5.568028000 | 21.960008000 | XXXX 1 | xx | Pd | 0.000 |
| Pd19 | 5.905756000 | 1.392028000 | 20.568023000 | XXXX 1 | xx | Pd | 0.000 |
| Pd20 | 5.905756000 | 4.176000000 | 20.568023000 | XXXX 1 | xx | Pd | 0.000 |
| Pd21 | 5.905756000 | 6.959972000 | 20.568023000 | XXXX 1 | xx | Pd | 0.000 |
| Pd22 | 3.937171000 | 0.000000000 | 19.176038000 | XXXX 1 | xx | Pd | 0.000 |
| Pd23 | 3.937171000 | 2.783972000 | 19.176038000 | XXXX 1 | xx | Pd | 0.000 |
| Pd24 | 3.937171000 | 5.568028000 | 19.176038000 | XXXX 1 | xx | Pd | 0.000 |
| Pd25 | 0.030552000 | 0.000585000 | 19.175585000 | XXXX 1 | xx | Pd | 0.000 |
| Pd26 | 0.030552000 | 2.784640000 | 19.175585000 | XXXX 1 | xx | Pd | 0.000 |
| Pd27 | 0.030474000 | 5.568612000 | 19.175585000 | XXXX 1 | xx | Pd | 0.000 |
| Pd28 | 1.984491000 | 1.391777000 | 17.725601000 | XXXX 1 | xx | Pd | 0.000 |
| Pd29 | 1.984413000 | 4.175749000 | 17.725148000 | XXXX 1 | xx | Pd | 0.000 |
| Pd30 | 1.984334000 | 6.959638000 | 17.725148000 | XXXX 1 | xx | Pd | 0.000 |
| Pd31 | 5.921662000 | 1.392362000 | 17.831631000 | XXXX 1 | xx | Pd | 0.000 |
| Pd32 | 5.921426000 | 4.176251000 | 17.831178000 | XXXX 1 | xx | Pd | 0.000 |
| Pd33 | 5.921505000 | 6.960139000 | 17.831178000 | XXXX 1 | xx | Pd | 0.000 |
| Pd34 | 0.040002000 | 8.351749000 | 16.401585000 | XXXX 1 | xx | Pd | 0.000 |
| Pd35 | 0.040159000 | 2.783638000 | 16.401585000 | XXXX 1 | xx | Pd | 0.000 |
| Pd36 | 0.039844000 | 5.567527000 | 16.401132000 | XXXX 1 | xx | Pd | 0.000 |
| Pd37 | 3.928115000 | 2.783388000 | 16.402491000 | XXXX 1 | xx | Pd | 0.000 |
| Pd38 | 3.928036000 | 5.567193000 | 16.402038000 | XXXX 1 | xx | Pd | 0.000 |
| Pd39 | 3.928351000 | 8.351499000 | 16.402944000 | XXXX 1 | xx | Pd | 0.000 |
| Pd40 | 5.920323000 | 1.391026000 | 15.136474000 | XXXX 1 | xx | Pd | 0.000 |
| Pd41 | 5.920087000 | 4.174831000 | 15.136020000 | XXXX 1 | xx | Pd | 0.000 |
| Pd42 | 5.920008000 | 6.958803000 | 15.136020000 | XXXX 1 | xx | Pd | 0.000 |
| H43  | 4.784448000 | 2.783509000 | 14.813653000 | XXXX 1 | xx | H  | 0.000 |
| H44  | 4.784327000 | 5.567528000 | 14.813308000 | XXXX 1 | xx | H  | 0.000 |
| H45  | 4.784472000 | 8.351801000 | 14.814017000 | XXXX 1 | xx | H  | 0.000 |
| H46  | 1.083094000 | 1.397647000 | 16.146732000 | XXXX 1 | xx | H  | 0.000 |
| H47  | 1.082973000 | 4.181726000 | 16.146330000 | XXXX 1 | xx | H  | 0.000 |
| H48  | 1.082856000 | 6.965576000 | 16.146515000 | XXXX 1 | xx | H  | 0.000 |
| H49  | 2.883673000 | 1.392031000 | 16.147297000 | XXXX 1 | xx | H  | 0.000 |
| H50  | 2.883493000 | 4.175967000 | 16.146767000 | XXXX 1 | xx | H  | 0.000 |
| H51  | 2.883790000 | 6.960290000 | 16.147130000 | XXXX 1 | xx | H  | 0.000 |
| H52  | 7.056651000 | 8.350437000 | 14.813892000 | XXXX 1 | xx | H  | 0.000 |
| H53  | 7.056827000 | 2.782554000 | 14.813815000 | XXXX 1 | xx | H  | 0.000 |
| H54  | 7.056528000 | 5.566429000 | 14.813346000 | XXXX 1 | xx | H  | 0.000 |
| Pd55 | 3.935535000 | 8.347911000 | 24.821098000 | XXXX 1 | xx | Pd | 0.000 |
| Pd56 | 3.935219000 | 2.784332000 | 24.817667000 | XXXX 1 | xx | Pd | 0.000 |
| Pd57 | 3.934349000 | 5.566300000 | 24.830912000 | XXXX 1 | xx | Pd | 0.000 |
| Pd58 | 3.994503000 | 2.779830000 | 28.214248000 | XXXX 1 | xx | Pd | 0.000 |
| Pd59 | 6.234498000 | 1.386958000 | 29.700603000 | XXXX 1 | xx | Pd | 0.000 |
| Pd60 | 3.964619000 | 5.557068000 | 31.171607000 | XXXX 1 | xx | Pd | 0.000 |
| Pd61 | 1.838599000 | 1.385522000 | 29.630961000 | XXXX 1 | xx | Pd | 0.000 |
| Pd62 | 1.839352000 | 6.959429000 | 29.635297000 | XXXX 1 | xx | Pd | 0.000 |
| Pd63 | 3.997922000 | 2.768775000 | 31.002050000 | XXXX 1 | xx | Pd | 0.000 |
| Pd64 | 3.996197000 | 8.346229000 | 31.008906000 | XXXX 1 | xx | Pd | 0.000 |
| Pd65 | 1.839318000 | 4.163703000 | 29.625117000 | XXXX 1 | xx | Pd | 0.000 |
| Pd66 | 6.228693000 | 6.957709000 | 29.721993000 | XXXX 1 | xx | Pd | 0.000 |
| Pd67 | 0.004335000 | 8.348301000 | 27.941489000 | XXXX 1 | xx | Pd | 0.000 |
| Pd68 | 0.003844000 | 2.780281000 | 27.940262000 | XXXX 1 | xx | Pd | 0.000 |
| Pd69 | 0.002025000 | 5.565132000 | 27.955609000 | XXXX 1 | xx | Pd | 0.000 |
| Pd70 | 2.032226000 | 1.389336000 | 26.567872000 | XXXX 1 | xx | Pd | 0.000 |
| Pd71 | 2.040597000 | 4.179699000 | 26.582238000 | XXXX 1 | xx | Pd | 0.000 |
| Pd72 | 2.040351000 | 6.951258000 | 26.584515000 | XXXX 1 | xx | Pd | 0.000 |
| Pd73 | 3.990776000 | 5.564790000 | 28.325573000 | XXXX 1 | xx | Pd | 0.000 |
| Pd74 | 3.994262000 | 8.348657000 | 28.219315000 | XXXX 1 | xx | Pd | 0.000 |

|      |             |             |              |        |    |    |       |
|------|-------------|-------------|--------------|--------|----|----|-------|
| Pd75 | 6.229502000 | 4.170825000 | 29.719288000 | XXXX 1 | xx | Pd | 0.000 |
| Pd76 | 5.806989000 | 1.388868000 | 26.370565000 | XXXX 1 | xx | Pd | 0.000 |
| Pd77 | 5.796139000 | 4.178488000 | 26.391739000 | XXXX 1 | xx | Pd | 0.000 |
| Pd78 | 5.796079000 | 6.953857000 | 26.396604000 | XXXX 1 | xx | Pd | 0.000 |
| H79  | 5.262566000 | 6.945105000 | 28.197726000 | XXXX 1 | xx | H  | 0.000 |
| H80  | 2.793772000 | 4.118241000 | 31.155158000 | XXXX 1 | xx | H  | 0.000 |
| H81  | 5.269386000 | 1.387552000 | 28.160403000 | XXXX 1 | xx | H  | 0.000 |
| H82  | 5.261201000 | 4.183007000 | 28.197215000 | XXXX 1 | xx | H  | 0.000 |
| H83  | 1.228534000 | 6.959379000 | 24.987046000 | XXXX 1 | xx | H  | 0.000 |
| H84  | 6.986343000 | 2.787643000 | 26.329715000 | XXXX 1 | xx | H  | 0.000 |
| H85  | 5.163991000 | 4.165689000 | 31.173158000 | XXXX 1 | xx | H  | 0.000 |
| H86  | 6.986768000 | 8.339602000 | 26.329421000 | XXXX 1 | xx | H  | 0.000 |
| H87  | 0.645249000 | 8.345313000 | 29.653208000 | XXXX 1 | xx | H  | 0.000 |
| H88  | 3.311930000 | 5.564767000 | 26.551430000 | XXXX 1 | xx | H  | 0.000 |
| H89  | 3.297810000 | 2.779308000 | 26.521896000 | XXXX 1 | xx | H  | 0.000 |
| H90  | 3.297413000 | 8.348927000 | 26.527264000 | XXXX 1 | xx | H  | 0.000 |
| H91  | 1.216486000 | 1.392409000 | 24.977149000 | XXXX 1 | xx | H  | 0.000 |
| H92  | 2.792206000 | 6.991790000 | 31.173719000 | XXXX 1 | xx | H  | 0.000 |
| H93  | 5.163048000 | 6.948574000 | 31.179420000 | XXXX 1 | xx | H  | 0.000 |
| H94  | 0.670097000 | 5.562571000 | 29.663784000 | XXXX 1 | xx | H  | 0.000 |
| H95  | 0.645880000 | 2.775744000 | 29.653791000 | XXXX 1 | xx | H  | 0.000 |
| H96  | 1.227895000 | 4.176820000 | 24.986058000 | XXXX 1 | xx | H  | 0.000 |
| H97  | 3.683972000 | 6.461179000 | 33.830923000 | XXXX 1 | xx | H  | 0.000 |
| H98  | 6.990934000 | 5.563687000 | 26.334247000 | XXXX 1 | xx | H  | 0.000 |
| H99  | 4.425297000 | 4.976521000 | 33.908117000 | XXXX 1 | xx | H  | 0.000 |
| H100 | 2.817263000 | 1.381919000 | 31.185643000 | XXXX 1 | xx | H  | 0.000 |
| H101 | 5.189616000 | 1.379650000 | 31.177678000 | XXXX 1 | xx | H  | 0.000 |
| H102 | 2.789247000 | 5.077080000 | 33.647406000 | XXXX 1 | xx | H  | 0.000 |
| N103 | 3.692799000 | 5.516441000 | 33.437499000 | XXXX 1 | xx | N  | 0.000 |
| end  |             |             |              |        |    |    |       |
